# Supplementary material for: A Ru(ii)-catalyzed C–H activation and annulation cascade for the construction of highly coumarin-fused benzo[a]quinolizin-4-ones and pyridin-2-ones
Source: Royal Society of Chemistry journal article supplement (doi:10.1039/d3qo00255a), 2023-01-01
Supplement: d3qo00255a1.pdf [file d3qo00255a1.pdf]

*Electronic supplementary information*

**A Ru(II)-Catalyzed C–H Activation and Annulation Cascade for the Construction of Highly Coumarin-fused Benzo[*a*]quinolizin-4-ones and Pyridin-2-ones**

Jing Wang,<sup>a,b</sup> Xiaoxue Zhang,<sup>a,b</sup> Jianhui Zhou,<sup>a,b</sup> Liping Yan,<sup>a,b</sup> Yuan Li,<sup>b</sup> Naixuan Zhao,<sup>c</sup> Hong Liu,<sup>a,b</sup> He Huang<sup>\*b</sup> and Yu Zhou<sup>\*a,b,c</sup>

<sup>a</sup>School of Chinese Materia Medica, Nanjing University of Chinese Medicine, Nanjing 210023, China

<sup>b</sup>Drug Discovery & Development Center, Shanghai Institute of Materia Medica, Chinese Academy of Sciences, Shanghai 201203, China

<sup>c</sup>School of Pharmaceutical Science and Technology, Hangzhou Institute for Advanced Study, UCAS, Hangzhou 310024, China.

\*E-mail: hhuang@simm.ac.cn (He Huang); zhouyu@simm.ac.cn (Yu Zhou)

## Contents

|                                                                    |    |
|--------------------------------------------------------------------|----|
| I. Genral Information .....                                        | 2  |
| II. Synthesis of Substrates .....                                  | 2  |
| III. Genral procedur for the Reaction .....                        | 5  |
| IV. Synthesis application .....                                    | 6  |
| V. Mechanistic Studies .....                                       | 9  |
| VI. Charaterization Date of Products .....                         | 12 |
| VII. X-ray Crystallographic Data .....                             | 27 |
| VIII. Reference .....                                              | 30 |
| IV. NMR Spectra and HR-MS Spectra of Substrates and Products ..... | 31 |

## I. General Information

Unless otherwise specified, the reagents were purchased from commercial sources, and used without further purification. Analytical thin-layer chromatography (TLC) was performed on HSGF 254 (0.2-0.3 mm thickness). All products were characterized by their NMR and HRMS spectra.  $^1\text{H}$  and  $^{13}\text{C}$  NMR spectra were recorded on a 400 or 500 MHz instrument. The chemical shifts were reported in parts per million (ppm,  $\delta$ ) downfield from tetramethylsilane (TMS). Proton coupling patterns were described as singlet (s), doublet (d), triplet (t), quartet (q), multiplet (m), doublet of doublets (dd), and broad (br). High-resolution mass spectra (HRMS) were measured on a Micromass Ultra Q-TOF spectrometer. Column chromatography was performed on silica gel (300-400 mesh) using dichloromethane (DCM)/methanol (MeOH).

## II. Synthesis of Substrates

(1) General procedure for the synthesis of substrate **1a-1g**<sup>1</sup>

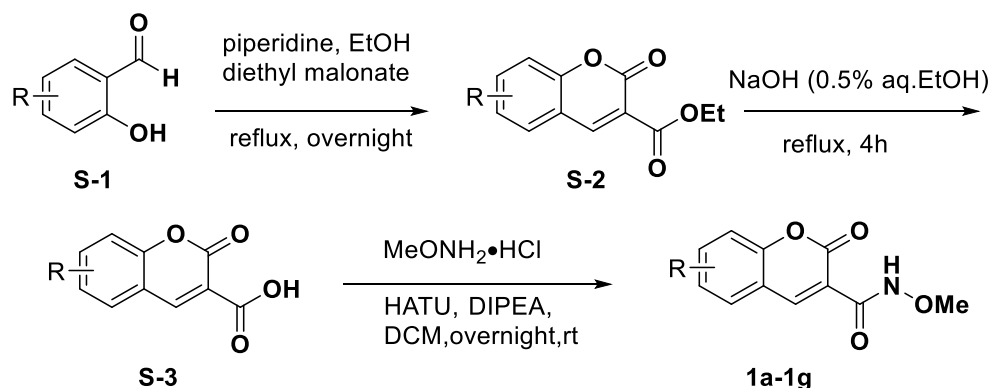

Firstly, salicylaldehyde compounds (**S-1**) (1 equiv), diethyl malonate (1 equiv) and catalytic amounts of piperidine were refluxed in ethanol overnight. After cooling to room temperature, the suspension was filtered off and **S-2** was attained. Afterwards, compound **S-2** was hydrolyzed in ethanolic solution with 0.5% NaOH (aq.) at reflux for 1h. After reaction 10% HCl (aq.) was added and the desired **S-3** was then filtered off and washed with water to yield 89%. Next, solution of **S-3** (1 equiv), MeONH<sub>2</sub> · HCl (1.3 equiv), HATU (1.5 equiv) and DIPEA (2 equiv) in DCM, the mixture was stirred at r.t. overnight. After that, the solution was directly concentrated

in vacuo then the crude product was purified by flash column chromatography on silica gel (PE/EA) to afford the pure product **1a-1g**.

*N*-methoxy-2-oxo-2*H*-chromene-3-carboxamide (**1a**)

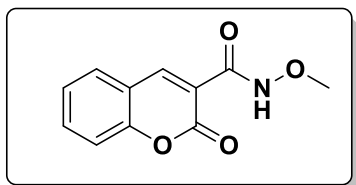

$^1\text{H}$  NMR (500 MHz,  $\text{CDCl}_3$ )  $\delta$  11.05 (s, 1H), 8.93 (s, 1H), 7.76 – 7.60 (m, 2H), 7.44 – 7.36 (m, 2H), 3.90 (s, 3H).  $^{13}\text{C}$  NMR (126 MHz,  $\text{CDCl}_3$ )  $\delta$  160.87, 159.60, 154.50, 149.13, 134.63, 129.99, 125.62, 118.48, 117.78, 116.87, 64.75. HRMS (ESI)  $m/z$   $[\text{M} + \text{H}]^+$  calculated for  $\text{C}_{11}\text{H}_{10}\text{NO}_4^+$ : 220.0604, found: 220.0603.

*N*-methoxy-6-methyl-2-oxo-2*H*-chromene-3-carboxamide (**1b**)

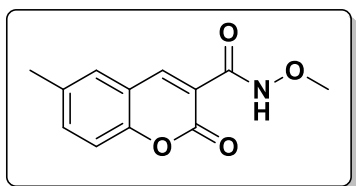

$^1\text{H}$  NMR (500 MHz,  $\text{CDCl}_3$ )  $\delta$  11.07 (s, 1H), 8.86 (s, 1H), 7.51 – 7.45 (m, 2H), 7.29 (d,  $J = 8.4$  Hz, 1H), 3.89 (s, 3H), 2.43 (s, 3H).  $^{13}\text{C}$  NMR (126 MHz,  $\text{CDCl}_3$ )  $\delta$  161.05, 159.74, 152.69, 149.08, 135.81, 135.54, 129.52, 118.24, 117.55, 116.55, 64.70, 20.87. HRMS (ESI)  $m/z$   $[\text{M} + \text{H}]^+$  calculated for  $\text{C}_{12}\text{H}_{12}\text{NO}_4^+$ : 234.0761, found: 234.0766.

*N*,6-dimethoxy-2-oxo-2*H*-chromene-3-carboxamide (**1c**)

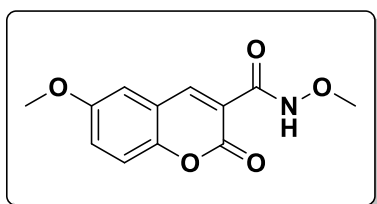

$^1\text{H}$  NMR (500 MHz,  $\text{DMSO-}d_6$ )  $\delta$  11.38 (s, 1H), 8.72 (s, 1H), 7.51 (d,  $J = 2.0$  Hz, 1H), 7.43 (d,  $J = 9.1$  Hz, 1H), 7.36 – 7.30 (m, 1H), 3.81 (s, 3H), 3.72 (s, 3H).  $^{13}\text{C}$  NMR (126 MHz,  $\text{DMSO-}d_6$ )  $\delta$  159.13, 159.03, 155.93, 148.31, 147.08, 121.91, 119.14, 118.67, 117.32, 111.77, 63.44, 55.83. HRMS (ESI)  $m/z$   $[\text{M} + \text{H}]^+$  calculated for  $\text{C}_{12}\text{H}_{12}\text{NO}_5^+$ : 250.071, found: 250.0712.



*6-Fluoro-N-methoxy-2-oxo-2H-chromene-3-carboxamide (1d)*

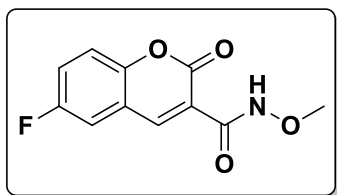

$^1\text{H}$  NMR (500 MHz,  $\text{DMSO-}d_6$ )  $\delta$  11.39 (s, 1H), 8.72 (s, 1H), 8.00 – 7.70 (m, 1H), 7.70 – 7.40 (m, 2H), 3.70 (s, 3H).  $^{13}\text{C}$  NMR (126 MHz,  $\text{DMSO-}d_6$ )  $\delta$  159.03 (s), 158.64 (d,  $J = 241.7$  Hz), 157.68 (s), 150.73 (s), 146.66 (s), 121.83 (d,  $J = 24.9$  Hz), 120.64 (s), 119.60 (d,  $J = 9.9$  Hz), 118.75 (d,  $J = 8.7$  Hz), 115.45 (d,  $J = 24.4$  Hz), 63.89 (s). HRMS (ESI)  $m/z$   $[\text{M} + \text{H}]^+$  calculated for  $\text{C}_{11}\text{H}_9\text{FNO}_4^+$ :238.051, found: 238.0512.

*6-Chloro-N-methoxy-2-oxo-2H-chromene-3-carboxamide (1e)*

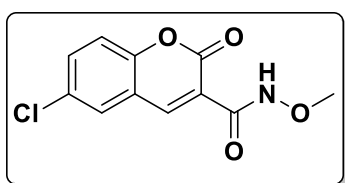

$^1\text{H}$  NMR (500 MHz,  $\text{DMSO-}d_6$ )  $\delta$  11.40 (s, 1H), 8.71 (s, 1H), 8.06 (d,  $J = 2.4$  Hz, 1H), 7.84 – 7.70 (m, 1H), 7.51 (d,  $J = 8.9$  Hz, 1H), 3.70 (s, 3H).  $^{13}\text{C}$  NMR (126 MHz,  $\text{DMSO-}d_6$ )  $\delta$  158.79, 158.39, 152.47, 145.93, 133.51, 128.94, 128.79, 120.28, 119.61, 118.26, 63.43. HRMS (ESI)  $m/z$   $[\text{M} + \text{H}]^+$  calculated for  $\text{C}_{11}\text{H}_9\text{ClO}_4^+$ :254.0215, found:254.0215.

*N-methoxy-2-oxo-6-(trifluoromethyl)-2H-chromene-3-carboxamide (1f)*

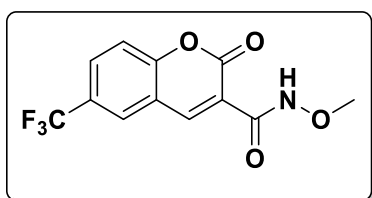

$^1\text{H}$  NMR (500 MHz,  $\text{CDCl}_3$ )  $\delta$  10.96 (s, 1H), 9.01 (s, 1H), 8.03 (s, 1H), 7.95 (d,  $J = 8.7$  Hz, 1H), 7.57 (d,  $J = 8.7$  Hz, 1H), 3.94 (s, 3H).  $^{13}\text{C}$  NMR (126 MHz,  $\text{CDCl}_3$ )  $\delta$  159.89 (s), 158.70 (s), 155.92 (s), 148.02 (s), 130.84 (d,  $J = 3.2$  Hz), 128.19 (q,  $J = 33.9$  Hz), 127.25 (d,  $J = 3.9$  Hz), 123.10 (q,  $J = 272.4$  Hz), 119.28 (s), 118.27 (s), 117.64 (s), 64.71 (s). HRMS (ESI)  $m/z$   $[\text{M} + \text{H}]^+$  calculated for  $\text{C}_{12}\text{H}_9\text{F}_3\text{NO}_4^+$ :288.0478, found: 288.0473.

*N-methoxy-7-methyl-2-oxo-2H-chromene-3-carboxamide (1g)*

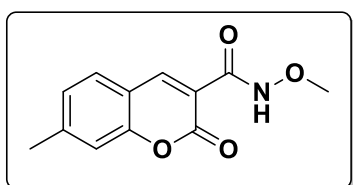

$^1\text{H}$  NMR (500 MHz,  $\text{CDCl}_3$ )  $\delta$  11.03 (s, 1H), 8.87 (s, 1H), 7.56 (d,  $J = 8.3$  Hz, 1H), 7.22 – 7.16 (m, 2H), 3.88 (s, 3H), 2.49 (s, 3H).  $^{13}\text{C}$  NMR (126 MHz,  $\text{CDCl}_3$ )  $\delta$



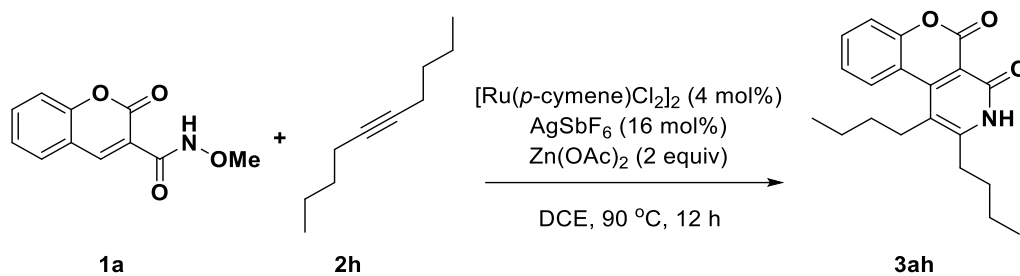

A mixture of **1a** (0.40 mmol, 1.0 equiv.), **2h** (1.2 mmol, 3.0 equiv.),  $AgSbF_6$  (0.16 mmol, 0.4 equiv.),  $Zn(OAc)_2$  (0.8 mmol, 2 equiv.) and  $[Ru(p\text{-cymene})Cl_2]_2$  (0.04 mmol, 0.1 equiv.) was combined in DCE (1.0 mL) in a dried tube. The mixture was stirred at 90 °C and monitored by TLC. After the reaction was finished, the volatiles were removed under reduced pressure and the residue was purified by flash chromatography on silica gel to afford the desired products **3ah**.

#### IV. Synthesis application

##### (a) Gram-scale Preparation

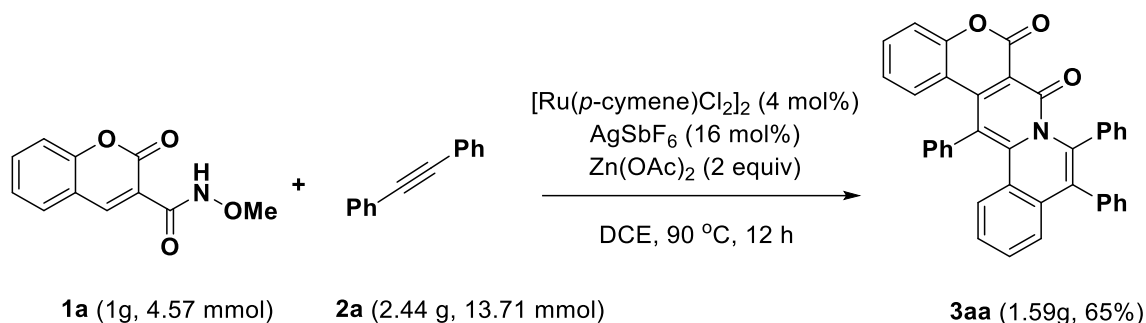

In a 100 mL reaction tube, the mixture of **1a** (1g, 4.57 mmol, 1.0 equiv.), **2a** (2.44g, 13.71 mmol, 3 equiv.),  $[Ru(p\text{-cymene})Cl_2]_2$  (111.8 mg, 4 mol %),  $AgSbF_6$  (250 mg, 16 mol %),  $Zn(OAc)_2$  (1.68 g, 9.14 mmol) and DCE (50 mL). Then the resulting mixture was stirred at 90 °C for 12 h. After that, the solvent was removed under reduced pressure and the residue was purified by silica gel chromatography using DCM/MeOH to afford the product **3aa** (1.59g, yield: 65%).

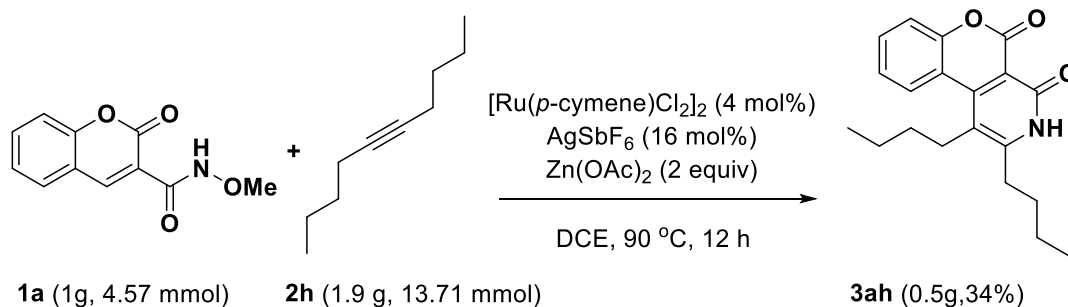

In a 100 mL reaction tube, the mixture of **1a** (1g, 4.57 mmol, 1.0 equiv.), **2h** (1.9 g, 13.71 mmol, 3 equiv.), [Ru(*p*-cymene)Cl<sub>2</sub>]<sub>2</sub> (111.8 mg, 4 mol %), AgSbF<sub>6</sub> (250 mg, 16 mol %), Zn(OAc)<sub>2</sub> (1.68 g, 9.14 mmol) and DCE (50 mL). Then the resulting mixture was stirred at 90 °C for 12 h. After that, the solvent was removed under reduced pressure and the residue was purified by silica gel chromatography using DCM/MeOH to afford the product **3ah** (0.5 g, yield: 34%).

(b) Transformation of **3aa** and **3ga**

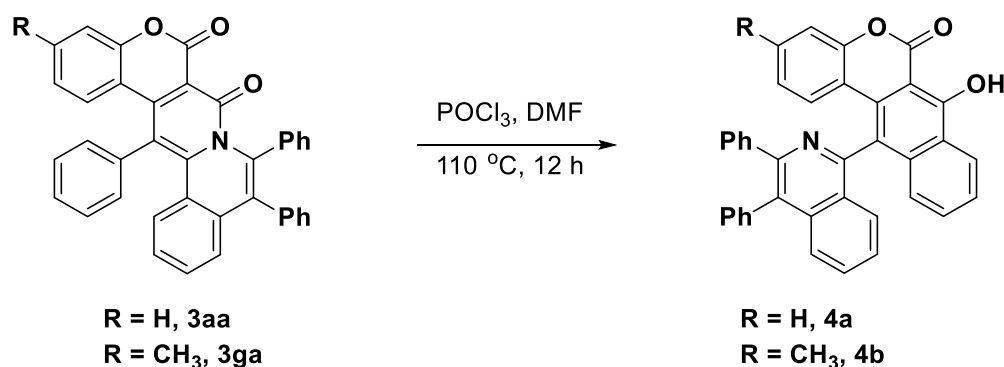

To a 25 mL round-bottom flask was added 1.5 mL *N,N*-dimethylformamide (DMF), and then was added 0.5 mL phosphorus oxychloride (POCl<sub>3</sub>) drop by drop under 0 °C ice bath. After stirring for 15 min, the mixed solvent was added a solution of **3aa** (108 mg, 0.2 mmol in 1 mL DMF). Then the reaction was heated to 110 °C and stirred for 12 h. The reaction was removed to 0 °C ice bath and was added saturated Na<sub>2</sub>CO<sub>3</sub> solution dropwise until the pH to 7~9. Then the reaction mixture was extracted with EtOAc (5 mL × 3), the organic phase was collected and washed with brine, dried over anhydrous Na<sub>2</sub>SO<sub>4</sub>, filtered, and concentrated under vacuum. The resulting residue was purified by column chromatography (PE/EA = 5/1, v/v) to afford **4a** as white solid (71.3 mg, 66% yield). Following the procedure for synthesis of **4b**, afford **4b** as white solid (57% yield).

*12-(3,4-Diphenylisoquinolin-1-yl)-7-hydroxy-6H-naphtho[2,3-c]chromen-6-one (4a)*

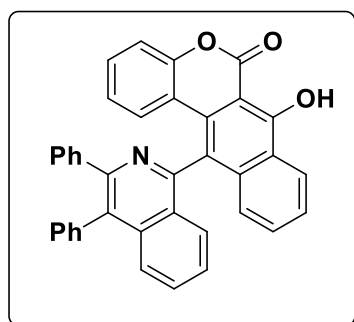

$^1\text{H NMR}$  (600 MHz,  $\text{DMSO-}d_6$ )  $\delta$  (600 MHz,  $\text{DMSO}$ )  
 $\delta$  13.45 (s, 1H), 8.58 (d,  $J = 8.1$  Hz, 1H), 7.77 – 7.66  
(m, 4H), 7.62 – 7.46 (m, 5H), 7.47 – 7.31 (m, 6H),  
7.17 (d,  $J = 7.7$  Hz, 4H), 6.87 (t,  $J = 7.5$  Hz, 1H), 6.33  
(d,  $J = 8.3$  Hz, 1H).  $^{13}\text{C NMR}$  (126 MHz,  $\text{DMSO-}d_6$ )  $\delta$   
168.42, 164.00, 160.18, 152.08, 151.97, 142.06,

139.05, 138.58, 138.23, 133.48, 133.36, 133.17, 133.02, 132.87, 132.22, 132.02,  
130.52, 130.38, 129.88, 129.67, 129.39, 129.17, 128.78, 128.75, 128.72, 128.44,  
128.10, 127.92, 127.65, 126.54, 125.55, 125.15, 124.86, 120.26, 119.84, 102.63.  
HRMS (ESI)  $m/z$   $[\text{M} + \text{H}]^+$  calculated for  $\text{C}_{38}\text{H}_{24}\text{NO}_3^+$ : 542.1751, found:542.1752.

*12-(3,4-diphenylisoquinolin-1-yl)-7-hydroxy-3-methyl-6H-naphtho[2,3-c]chromen-6-one (4b)*

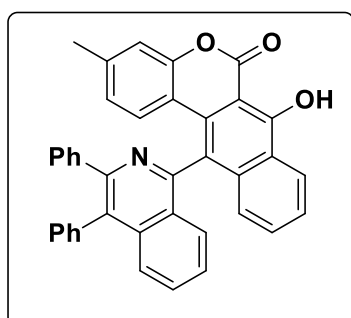

$^1\text{H NMR}$  (600 MHz,  $\text{DMSO-}d_6$ )  $\delta$  13.47 (s, 1H), 8.58 (d,  
 $J = 7.6$  Hz, 1H), 7.78 – 7.67 (m, 4H), 7.63 – 7.51 (m, 3H),  
7.51 – 7.41 (m, 3H), 7.37 – 7.29 (m, 5H), 7.25 – 7.17 (m,  
5H), 1.83 (s, 3H).  $^{13}\text{C NMR}$  (126 MHz,  $\text{DMSO-}d_6$ )  $\delta$   
174.51, 166.83, 162.34, 158.74, 150.55, 148.35, 140.43,  
137.23, 136.85, 136.54, 133.21, 131.80, 131.46, 131.16,

131.04, 131.00, 130.22, 129.86, 129.00, 128.87, 128.27, 128.04, 127.83, 127.52,  
127.40, 127.19, 127.03, 126.47, 126.19, 125.76, 123.89, 123.36, 123.11, 118.08,  
117.73, 100.96, 55.12. HRMS (ESI)  $m/z$   $[\text{M} + \text{H}]^+$  calculated for  $\text{C}_{39}\text{H}_{26}\text{NO}_3^+$ :  
556.1907, found:556.191.

(c) Transformation of **3ah**

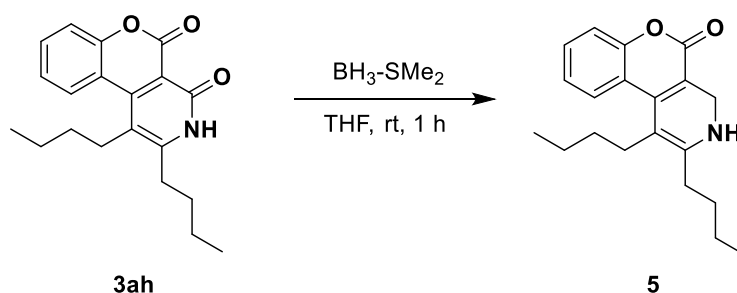

To a 25 mL round-bottom flask was added 65 mg **3ah** (0.2 mmol) and dissolved in 1 mL dry tetrahydrofuran, after addition of 0.8 mL borane-methyl sulfide complex (2M solution in THF, 1.6 mmol) drop by drop under cooling in an ice bath, then ice-bath was removed, warmed to r.t. and stirred for 1 h. After TLC indicating full consumption of the starting material and the reaction mixture was added 4 mL water. Then the reaction mixture was extracted with 4 mL EtOAc, and the organic phase was collected and washed with brine, dried over anhydrous Na<sub>2</sub>SO<sub>4</sub>, filtered, and concentrated under vacuum. The resulting residue was purified by column chromatography (DCM/MeOH = 10:1, v/v) to afford **5** as pale yellow solid (51 mg, 82% yield).

#### 1,2-Dibutyl-3,4-dihydro-5H-chromeno[3,4-c]pyridin-5-one (**5**)

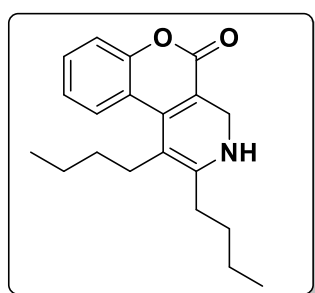

<sup>1</sup>H NMR (500 MHz, CDCl<sub>3</sub>) δ 7.30 – 7.22 (m, 1H), 6.97 (d, *J* = 8.2 Hz, 1H), 6.89 (t, *J* = 7.3 Hz, 1H), 6.80 (d, *J* = 6.4 Hz, 1H), 4.45 (d, *J* = 13.1 Hz, 1H), 4.12 – 3.64 (m, 1H), 2.69 – 2.52 (m, 2H), 2.32 – 1.99 (m, 2H), 1.68 (d, *J* = 5.4 Hz, 2H), 1.47 – 0.76 (m, 10H), 0.63 (t, *J* = 7.2 Hz, 2H).

<sup>13</sup>C NMR (126 MHz, CDCl<sub>3</sub>) δ 163.86, 153.06, 150.31, 145.79, 130.02, 129.29, 126.21, 119.67, 119.38, 117.37, 60.68, 32.75, 32.16, 30.95, 27.45, 23.09, 22.68, 13.59, 13.46. HRMS (ESI) *m/z* [M + H]<sup>+</sup> calculated for C<sub>20</sub>H<sub>26</sub>NO<sub>2</sub><sup>+</sup>: 312.1958, found:312.1958.

## V. Mechanistic Studies

### (a) H/D exchange experiment

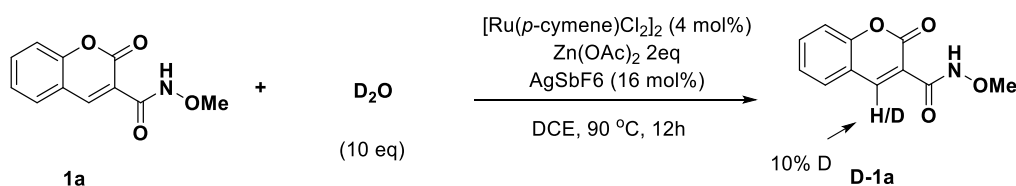

A pressure tube was charged with N-Methoxy-coumarin-3-carboxamide (**1a**, 21.9 mg, 0.1 mmol) and D<sub>2</sub>O (20 mg, 1 mmol), [Ru(*p*-cymene)Cl<sub>2</sub>]<sub>2</sub> (2.4 mg, 4 mol %),

AgSbF<sub>6</sub> (5.5 mg, 16 mol %), Zn(OAc)<sub>2</sub> (36.7 mg, 0.2 mmol) and DCE (2 mL). The reaction mixture was stirred at 90 °C in oil bath for 12 h. After that, the solvent was removed under reduced pressure and the residue was purified by silica gel chromatography using DCM/MeOH to afford the product **D-1a**.

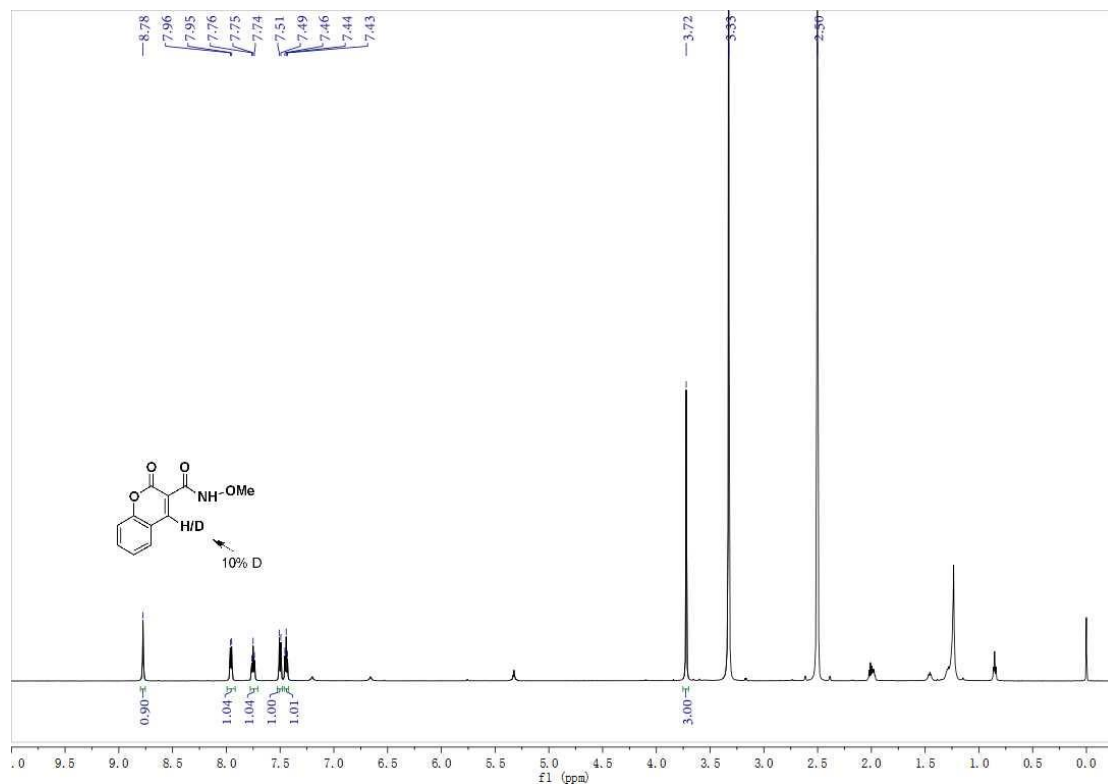

<sup>1</sup>H NMR Spectrum of **D-1a** (DMSO-*d*<sub>6</sub>, 500 MHz)

### (b) Competition experiment

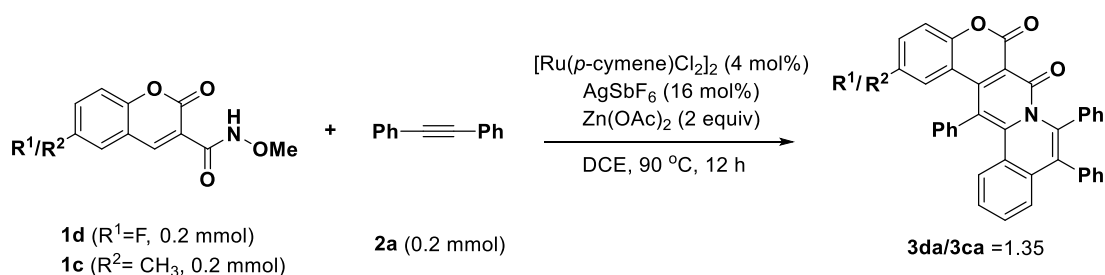

A pressure tube was charged with N,6-Dimethoxy-2-oxo-2H-chromene-3-carboxamide (**1d**, 47.4 mg, 0.2 mmol), N,6-dimethoxy-2-oxo-2H-chromene-3-carboxamide (**1c**, 49.8 mg, 0.2 mmol), 1,2-diphenylethyne (**2a**, 35.6 mg, 0.2 mmol), [Ru(*p*-cymene)Cl<sub>2</sub>]<sub>2</sub> (4.9 mg, 4 mol %), AgSbF<sub>6</sub> (11.0 mg, 16 mol %), Zn(OAc)<sub>2</sub> (73.4 mg, 0.4 mmol) and DCE (2 mL). The reaction mixture was stirred at 90 °C in oil bath for 12 h. After that, the solvent was removed under reduced pressure and the residue was purified by silica gel

chromatography using DCM/MeOH to afford the product **3da** and **3ca**. The ratio of **3da/3ca** = 1.35.

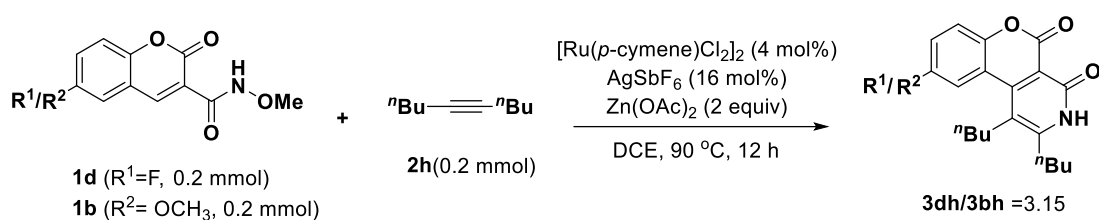

A pressure tube was charged with N,6-Dimethoxy-2-oxo-2H-chromene-3-carboxamide (**1d**, 47.4 mg, 0.2 mmol), N-methoxy-6-methyl-2-oxo-2H-chromene-3-carboxamide (**1b**, 46.6 mg, 0.2 mmol), dec-5-yne (**2h**, 27.7 mg, 0.2 mmol),  $[\text{Ru}(p\text{-cymene})\text{Cl}_2]_2$  (4.9 mg, 4 mol %),  $\text{AgSbF}_6$  (11.0 mg, 16 mol %),  $\text{Zn}(\text{OAc})_2$  (73.4 mg, 0.4 mmol) and DCE (2 mL). The reaction mixture was stirred at 90 °C in oil bath for 12 h. After that, the solvent was removed under reduced pressure and the residue was purified by silica gel chromatography using DCM/MeOH to afford the product **3dh** and **3bh**. The ratio of **3dh/3bh** = 3.15.

(c) Intermediate trapping experiment

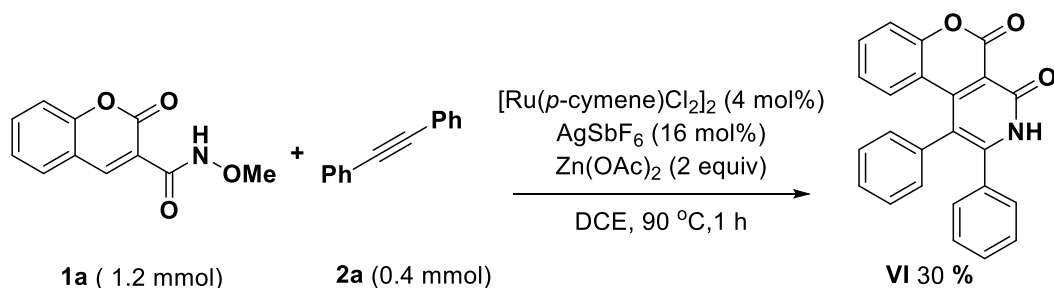

A mixture of **1a** (1.2 mmol, 3.0 equiv.), **2a** (0.4 mmol, 1.0 equiv.),  $\text{AgSbF}_6$  (0.48 mmol, 0.4 equiv.),  $\text{Zn}(\text{OAc})_2$  (2.4 mmol, 2 equiv.) and  $[\text{Ru}(p\text{-cymene})\text{Cl}_2]_2$  (0.12 mmol, 0.1 equiv.) was combined in DCE (4.0 mL) in a dried tube. The mixture was stirred at 90 °C for 1 h. After the reaction was finished, the volatiles were removed under reduced pressure and the residue was purified by flash chromatography on silica gel to afford the desired products **VI**.



## VI. Characterization Data of Products

### *9,10,15-Triphenyl-6H,7H-chromeno[4',3':4,5]pyrido[2,1-a]isoquinoline-6,7-dione*

#### (3aa)

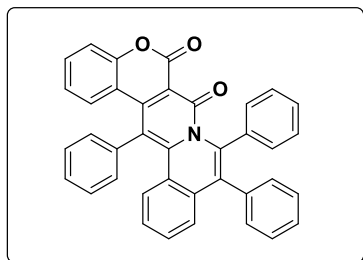

$^1\text{H}$  NMR (500 MHz,  $\text{DMSO-}d_6$ )  $\delta$  7.62 – 7.55 (m, 1H), 7.56 – 7.49 (m, 4H), 7.49 – 7.42 (m, 2H), 7.36 – 7.13 (m, 9H), 7.10 – 6.96 (m, 5H), 6.84 – 6.75 (m, 1H), 6.75 – 6.67 (m, 1H).  $^{13}\text{C}$  NMR (126 MHz,  $\text{DMSO-}d_6$ )  $\delta$  157.70, 155.61, 153.58, 147.60, 144.78, 139.30, 136.40, 135.82, 134.92, 134.15, 132.56, 132.41, 131.15, 131.10, 130.35, 129.20, 129.11, 128.95, 128.68, 128.34, 128.05, 127.48, 127.32, 127.17, 126.30, 125.43, 125.06, 122.64, 117.19, 116.99, 115.39, 105.85. HRMS (ESI)  $m/z$   $[\text{M} + \text{H}]^+$  calculated for  $\text{C}_{38}\text{H}_{24}\text{NO}_3^+$ : 542.1751, found: 542.1752.

### *12-Methyl-9,10,15-tri-p-tolyl-6H,7H-chromeno[4',3':4,5]pyrido[2,1-a]isoquinoline-6,7-dione (3ab)*

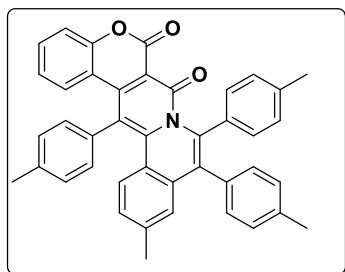

$^1\text{H}$  NMR (600 MHz,  $\text{DMSO-}d_6$ )  $\delta$  7.50 – 7.42 (m, 1H), 7.40 – 7.29 (m, 5H), 7.18 – 7.03 (m, 6H), 6.99 – 6.80 (m, 6H), 6.79 – 6.72 (m, 1H), 2.45 (s, 3H), 2.29 (s, 3H), 2.21 (s, 3H), 2.18 (s, 3H).  $^{13}\text{C}$  NMR (151 MHz,  $\text{DMSO-}d_6$ )  $\delta$  158.33, 156.17, 153.97, 147.88, 145.74, 141.83, 138.96, 137.06, 136.94, 136.84, 135.06, 133.60, 132.87, 132.65, 132.51, 131.41, 129.46, 129.20, 129.15, 128.60, 128.32, 128.04, 125.65, 123.40, 123.10, 117.58, 115.14, 105.41, 21.60, 21.55, 21.31, 21.25. HRMS (ESI)  $m/z$   $[\text{M} + \text{Na}]^+$  calculated for  $\text{C}_{42}\text{H}_{31}\text{NNaO}_3^+$ : 620.2196, found: 620.2194.

*12-(tert-Butyl)-9,10,15-tris(4-(tert-butyl)phenyl)-6H,7H-chromeno[4',3':4,5]pyrido[2,1-a]isoquinoline-6,7-dione (3ac)*

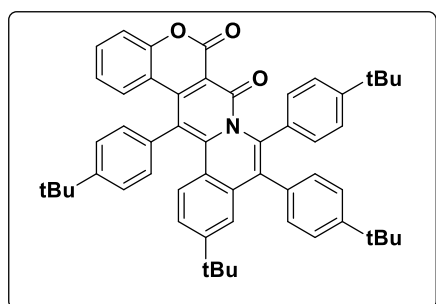

$^1\text{H}$  NMR (500 MHz,  $\text{DMSO-}d_6$ )  $\delta$  7.55 (d,  $J = 8.3$  Hz, 2H), 7.47 – 7.37 (m, 3H), 7.33 – 7.23 (m, 4H), 7.11 – 6.91 (m, 8H), 6.75 (t,  $J = 7.7$  Hz, 1H), 6.69 (d,  $J = 7.4$  Hz, 1H), 1.38 (s, 9H), 1.22 (s, 9H), 1.14 (s, 9H), 1.09 (s, 9H).  $^{13}\text{C}$  NMR (126 MHz,  $\text{DMSO-}d_6$ )  $\delta$  157.73, 155.75, 153.80, 153.46, 152.11, 149.56, 149.02, 147.26, 144.87, 136.65, 136.44, 134.11, 133.26, 132.37, 131.99, 131.91, 130.78, 129.59, 128.88, 128.67, 128.62, 127.04, 124.31, 124.01, 123.54, 122.96, 122.45, 121.29, 117.07, 114.59, 104.71, 34.61, 34.60, 34.18, 34.06, 31.15, 30.96, 30.87, 30.32. HRMS (ESI)  $m/z$   $[\text{M} + \text{H}]^+$  calculated for  $\text{C}_{54}\text{H}_{56}\text{NO}_3^+$ : 766.4255, found: 766.4257.

*12-Fluoro-9,10,15-tris(4-fluorophenyl)-6H,7H-chromeno[4',3':4,5]pyrido[2,1-a]isoquinoline-6,7-dione (3ad)*

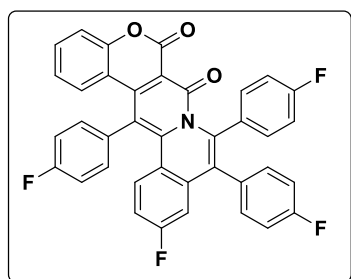

$^1\text{H}$  NMR (500 MHz,  $\text{DMSO-}d_6$ )  $\delta$  7.63 – 7.55 (m, 2H), 7.54 – 7.46 (m, 1H), 7.46 – 7.39 (m, 2H), 7.36 – 7.24 (m, 5H), 7.21 – 7.02 (m, 4H), 7.00 – 6.87 (m, 3H), 6.86 – 6.81 (m, 1H), 6.70 (d,  $J = 7.8$  Hz, 1H).  $^{13}\text{C}$  NMR (126 MHz,  $\text{DMSO-}d_6$ )  $\delta$  163.18 (d,  $J = 252.0$  Hz), 163.09 (d,  $J = 247.5$  Hz), 161.92 (d,  $J = 244.9$  Hz), 161.61 (d,  $J = 245.0$  Hz), 157.92 (s), 155.97 (s), 154.08 (s), 148.46 (s), 144.82 (s), 137.37 (s), 137.30 (s), 135.80 (d,  $J = 3.2$  Hz), 134.94 (d,  $J = 8.0$  Hz), 133.63 (d,  $J = 8.2$  Hz), 133.18 (s), 132.51 (d,  $J = 9.8$  Hz), 132.37 (d,  $J = 3.0$  Hz), 131.72 (d,  $J = 8.3$  Hz), 131.09 (d,  $J = 3.0$  Hz), 128.90 (s), 127.24 (s), 123.26 (s), 122.26 (d,  $J = 1.4$  Hz), 118.05 (d,  $J = 21.5$  Hz), 117.73 (s), 117.25 (s), 115.76 (d,  $J = 21.6$  Hz), 115.26 (d,  $J = 23.0$  Hz), 114.76 (d,  $J = 17.1$  Hz), 114.65 (s), 110.99 (d,  $J = 22.8$  Hz), 106.43 (s). HRMS (ESI)  $m/z$   $[\text{M} + \text{H}]^+$  calculated for  $\text{C}_{38}\text{H}_{20}\text{F}_4\text{NO}_3^+$ : 614.1374, found: 614.1371.

*12-Chloro-9,10,15-tris(4-chlorophenyl)-6H,7H-chromeno[4',3':4,5]pyrido[2,1-a]isoquinoline-6,7-dione (3ae)*

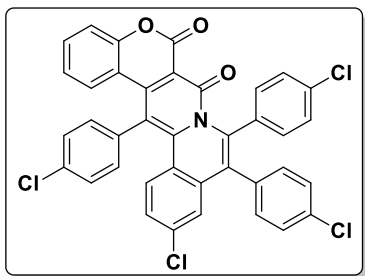

$^1\text{H}$  NMR (500 MHz,  $\text{DMSO-}d_6$ )  $\delta$  8.11 – 7.85 (m, 2H), 7.80 – 7.71 (m, 1H), 7.68 – 7.38 (m, 7H), 7.38 – 7.16 (m, 6H), 7.08 – 6.84 (m, 2H), 6.74 – 6.64 (m, 1H).  $^{13}\text{C}$  NMR (126 MHz,  $\text{DMSO-}d_6$ )  $\delta$  162.64, 160.45, 157.43, 155.57, 154.16, 153.76, 148.17, 148.13, 147.94, 144.13, 137.80, 136.76, 136.21, 135.65, 134.28, 134.22, 133.11, 133.01, 132.36, 131.07, 130.69, 130.38, 128.60, 128.52, 127.58, 127.52, 126.31, 125.21, 124.31, 123.91, 123.02, 119.41, 118.57, 117.45, 116.76, 116.24, 114.77, 106.74. HRMS (ESI)  $m/z$  [ $\text{M} + \text{Na}$ ] $^+$  calculated for  $\text{C}_{38}\text{H}_{19}\text{Cl}_4\text{NNaO}_3^+$ : 700.0011, found: 700.0023

*12-Bromo-9,10,15-tris(4-bromophenyl)-6H,7H-chromeno[4',3':4,5]pyrido[2,1-a]isoquinoline-6,7-dione (3af)*

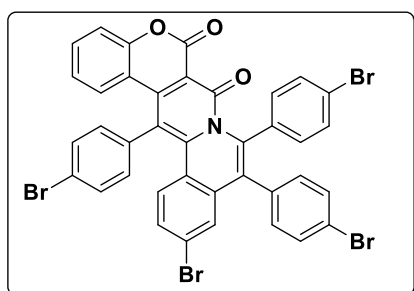

$^1\text{H}$  NMR (500 MHz,  $\text{DMSO-}d_6$ )  $\delta$  7.76 (d,  $J = 8.4$  Hz, 2H), 7.59 – 7.46 (m, 5H), 7.41 – 7.29 (m, 4H), 7.28 – 7.14 (m, 5H), 6.95 – 6.87 (m, 2H), 6.72 – 6.65 (m, 1H).  $^{13}\text{C}$  NMR (126 MHz,  $\text{DMSO-}d_6$ )  $\delta$  157.29, 155.44, 153.64, 148.02, 144.03, 138.03, 136.58, 135.57, 134.65, 134.41, 133.49, 133.42, 133.29, 132.91, 131.40, 131.22, 130.88, 130.37, 129.52, 128.45, 127.25, 126.05, 125.14, 124.10, 122.91, 122.81, 121.49, 121.03, 117.34, 116.63, 114.74, 106.66. HRMS (ESI)  $m/z$  [ $\text{M} + \text{H}$ ] $^+$  calculated for  $\text{C}_{38}\text{H}_{20}\text{Br}_4\text{NO}_3^+$ : 853.8171, found: 853.8169

*12-(Trifluoromethyl)-9,10,15-tris(4-(trifluoromethyl)phenyl)-6H,7H-chromeno[4',3':4,5]pyrido[2,1-a]isoquinoline-6,7-dione (3ag)*

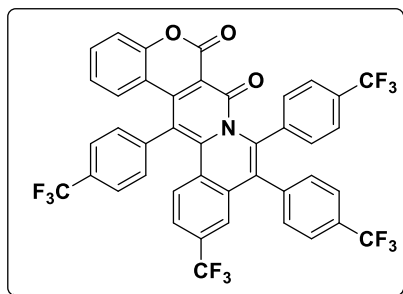

<sup>1</sup>H NMR (500 MHz, DMSO-*d*<sub>6</sub>) δ 7.95 (d, *J* = 8.2 Hz, 2H), 7.85 (d, *J* = 8.1 Hz, 2H), 7.74 (d, *J* = 8.2 Hz, 2H), 7.60 (d, *J* = 8.0 Hz, 2H), 7.55 – 7.46 (m, 6H), 7.43 – 7.31 (m, 2H), 7.14 (d, *J* = 8.7 Hz, 1H), 6.96 – 6.83 (m, 1H), 6.64 – 6.52 (m, 1H). <sup>13</sup>C NMR (126 MHz, DMSO-*d*<sub>6</sub>) δ 157.05, 155.30, 153.69, 148.43, 143.13, 142.91, 139.27, 138.25, 136.45, 133.84, 133.26, 133.16, 132.17, 130.68, 130.52, 130.42, 129.98, 129.62, 128.69, 128.38, 128.06, 127.77, 127.24, 126.55, 125.21, 125.04, 124.20, 123.04, 122.91, 122.10, 121.35, 117.40, 116.38, 115.74, 108.07. HRMS (ESI) *m/z* [M + Na]<sup>+</sup> calculated for C<sub>42</sub>H<sub>19</sub>F<sub>12</sub>NNaO<sub>3</sub><sup>+</sup>: 836.1066, found: 836.1065

*2-Methyl-9,10,15-triphenyl-6H,7H-chromeno[4',3':4,5]pyrido[2,1-a]isoquinoline-6,7-dione (3ba)*

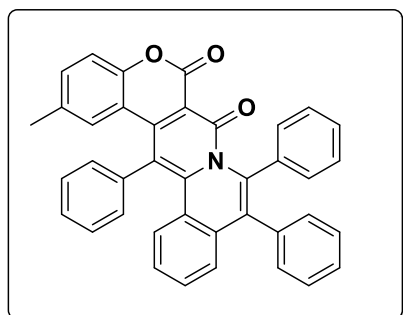

<sup>1</sup>H NMR (500 MHz, DMSO-*d*<sub>6</sub>) δ 7.63 – 7.57 (m, 1H), 7.58 – 7.49 (m, 4H), 7.49 – 7.42 (m, 1H), 7.37 – 7.29 (m, 2H), 7.29 – 7.25 (m, 1H), 7.25 – 7.21 (m, 2H), 7.22 – 7.17 (m, 3H), 7.16 (s, 1H), 7.10 – 7.06 (m, 3H), 7.06 – 6.99 (m, 2H), 6.66 (d, *J* = 8.6 Hz, 1H), 6.57 (d, *J* = 8.5 Hz, 1H), 2.30 (s, 3H). <sup>13</sup>C NMR (126 MHz, DMSO-*d*<sub>6</sub>) δ 157.67, 155.66, 153.61, 147.74, 144.53, 143.56, 139.32, 136.34, 135.81, 134.91, 134.10, 132.33, 131.05, 131.02, 130.28, 129.08, 129.05, 128.87, 128.35, 128.12, 127.98, 127.39, 127.22, 127.10, 126.21, 125.34, 125.00, 123.76, 117.03, 115.17, 114.30, 105.37, 20.69. HRMS (ESI) *m/z* [M + H]<sup>+</sup> calculated for C<sub>39</sub>H<sub>26</sub>Br<sub>4</sub>NO<sub>3</sub><sup>+</sup>: 556.1907, found: 556.1902

*12-Fluoro-9,10,15-tris(4-fluorophenyl)-2-methyl-6H,7H-chromeno[4',3':4,5]pyrido[2,1-a]isoquinoline-6,7-dione (3bd)*

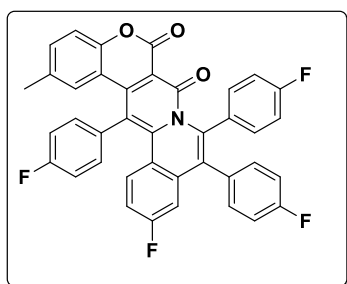

$^1\text{H}$  NMR (500 MHz,  $\text{DMSO-}d_6$ )  $\delta$  7.60 – 7.54 (m, 2H), 7.47 – 7.37 (m, 2H), 7.34 – 7.28 (m, 2H), 7.28 – 7.22 (m, 2H), 7.21 – 7.15 (m, 3H), 7.14 – 7.07 (m, 1H), 7.07 – 7.01 (m, 1H), 7.00 – 6.92 (m, 2H), 6.82 (dd,  $J = 9.9, 2.7$  Hz, 1H), 6.77 – 6.72 (m, 1H), 6.54 (d,  $J = 8.5$  Hz, 1H), 2.31 (s, 3H).  $^{13}\text{C}$  NMR (126 MHz,  $\text{DMSO-}d_6$ )  $\delta$  162.93 (d,  $J = 251.9$  Hz), 162.84 (d,  $J = 247.4$  Hz), 161.69 (d,  $J = 245.1$  Hz), 161.38 (d,  $J = 245.0$  Hz), 157.74 (s), 155.88 (s), 153.95 (s), 148.43 (s), 144.41 (s), 144.07 (s), 137.15 (s), 137.08 (s), 135.65 (d,  $J = 3.3$  Hz), 134.69 (d,  $J = 8.0$  Hz), 133.42 (d,  $J = 8.1$  Hz), 132.27 (d,  $J = 9.8$  Hz), 132.20 (d,  $J = 3.0$  Hz), 131.49 (d,  $J = 8.4$  Hz), 130.91 (d,  $J = 2.9$  Hz), 128.39 (s), 126.87 (d,  $J = 2.1$  Hz), 124.23 (s), 122.02 (s), 117.82 (d,  $J = 21.5$  Hz), 117.41 (s), 115.53 (d,  $J = 21.3$  Hz), 115.00 (d,  $J = 23.1$  Hz), 114.51 (d,  $J = 22.3$  Hz), 114.40 (s), 114.32 (s), 110.74 (d,  $J = 23.2$  Hz), 105.77 (s), 21.00 (s). HRMS (ESI)  $m/z$   $[\text{M} + \text{H}]^+$  calculated for  $\text{C}_{39}\text{H}_{22}\text{F}_4\text{NO}_3^+$ : 628.153, found: 628.1527

*12-Bromo-9,10,15-tris(4-bromophenyl)-2-methyl-6H,7H-chromeno[4',3':4,5]pyrido[2,1-a]isoquinoline-6,7-dione (3bf)*

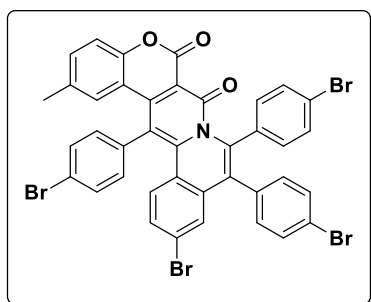

$^1\text{H}$  NMR (500 MHz,  $\text{DMSO-}d_6$ )  $\delta$  7.76 (d,  $J = 8.4$  Hz, 2H), 7.56 (d,  $J = 8.4$  Hz, 2H), 7.48 (d,  $J = 8.4$  Hz, 2H), 7.42 – 7.37 (m, 1H), 7.33 (d,  $J = 8.5$  Hz, 2H), 7.25 (d,  $J = 8.4$  Hz, 2H), 7.21 – 7.13 (m, 4H), 6.90 (d,  $J = 9.0$  Hz, 1H), 6.80 – 6.71 (m, 1H), 6.53 (d,  $J = 8.5$  Hz, 1H), 2.31 (s, 3H).  $^{13}\text{C}$  NMR (126 MHz,  $\text{DMSO-}d_6$ )  $\delta$  157.34, 155.58, 153.73, 148.20, 144.09, 143.86, 138.12, 136.58, 135.59, 134.70, 134.40, 133.48, 133.30, 131.39, 131.21, 130.88, 130.36, 129.50, 128.16, 127.22, 125.89, 125.06, 124.10, 122.75, 121.46, 120.98, 117.24, 114.60, 114.01, 106.17, 20.80. HRMS (ESI)  $m/z$   $[\text{M} + \text{H}]^+$  calculated for  $\text{C}_{39}\text{H}_{22}\text{Br}_4\text{NO}_3^+$ : 867.8323, found: 867.8329

2-Methoxy-9,10,15-triphenyl-6H,7H-chromeno[4',3':4,5]pyrido[2,1-a]isoquinoline-6,7-dione (**3ca**)

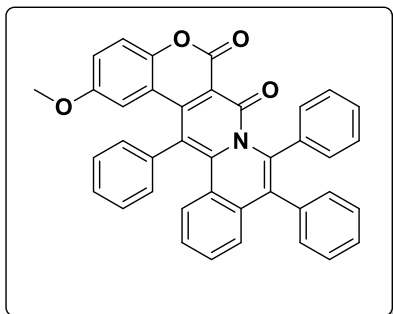

$^1\text{H}$  NMR (500 MHz,  $\text{DMSO-}d_6$ )  $\delta$  7.59 (s, 5H), 7.48 (t,  $J = 7.6$  Hz, 1H), 7.36 – 7.16 (m, 9H), 7.15 – 6.95 (m, 6H), 6.38 (d,  $J = 2.8$  Hz, 1H), 3.19 (s, 3H).  $^{13}\text{C}$  NMR (126 MHz,  $\text{DMSO-}d_6$ )  $\delta$  157.75, 155.80, 153.79, 147.94, 147.33, 144.66, 139.39, 136.40, 135.80, 134.93, 134.16, 132.53, 131.11, 130.50, 129.21, 129.10, 128.97, 128.31, 128.06, 127.48, 127.33, 127.20, 126.31, 125.43, 125.03, 120.95, 118.12, 117.11, 115.28, 114.42, 111.07, 106.04, 54.83. HRMS (ESI)  $m/z$   $[\text{M} + \text{H}]^+$  calculated for  $\text{C}_{39}\text{H}_{26}\text{NO}_4^+$ : 572.1856, found: 572.1854

12-Fluoro-9,10,15-tris(4-fluorophenyl)-2-methoxy-6H,7H-chromeno[4',3':4,5]pyrido[2,1-a]isoquinoline-6,7-dione (**3cd**)

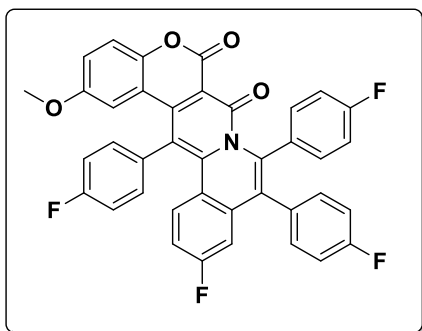

$^1\text{H}$  NMR (500 MHz,  $\text{DMSO-}d_6$ )  $\delta$  7.70 – 7.58 (m, 2H), 7.51 – 7.40 (m, 2H), 7.36 – 7.24 (m, 5H), 7.22 – 7.09 (m, 4H), 7.08 – 7.01 (m, 1H), 7.01 – 6.94 (m, 2H), 6.92 – 6.78 (m, 1H), 6.29 (d,  $J = 2.9$  Hz, 1H), 3.28 (s, 3H).  $^{13}\text{C}$  NMR (126 MHz,  $\text{DMSO-}d_6$ ) 162.45 (d,  $J = 252.1$  Hz), 162.36 (d,  $J = 247.7$  Hz), 161.20 (d,  $J = 245.2$  Hz), 160.89 (d,  $J = 245.2$  Hz), 157.99 (s), 156.16 (s), 154.28 (s), 148.47 (s), 148.16 (s), 144.70 (s), 137.37 (s), 137.31 (s), 135.86 (d,  $J = 3.3$  Hz), 135.10 (d,  $J = 7.8$  Hz), 133.65 (d,  $J = 8.2$  Hz), 132.56 (d,  $J = 9.1$  Hz), 132.35 (d,  $J = 3.0$  Hz), 131.72 (d,  $J = 8.2$  Hz), 131.10 (d,  $J = 2.8$  Hz), 127.23 (d,  $J = 2.8$  Hz), 122.24 (s), 121.40 (s), 118.71 (s), 118.15 (d,  $J = 21.4$  Hz), 117.41 (s), 115.78 (d,  $J = 21.5$  Hz), 115.29 (d,  $J = 22.7$  Hz), 114.77 (d,  $J = 21.7$  Hz), 114.56 (s), 111.44 (s), 111.00 (d,  $J = 23.0$  Hz), 106.63 (s), 55.26 (s). HRMS (ESI)  $m/z$   $[\text{M} + \text{H}]^+$  calculated for  $\text{C}_{39}\text{H}_{22}\text{F}_4\text{NO}_3^+$ : 644.1479, found: 644.1481

*12-Bromo-9,10,15-tris(4-bromophenyl)-2-methoxy-6H,7H-chromeno[4',3':4,5]pyrido[2,1-a]isoquinoline-6,7-dione (3cf)*

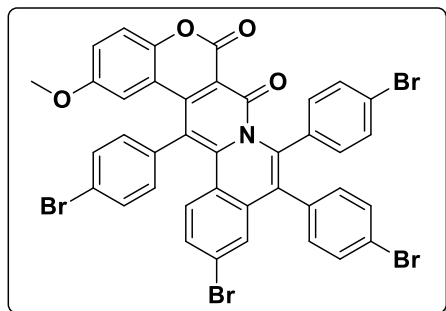

$^1\text{H}$  NMR (500 MHz, DMSO- $d_6$ )  $\delta$  7.79 (d,  $J$  = 8.4 Hz, 2H), 7.59 – 7.51 (m, 4H), 7.43 – 7.36 (m, 1H), 7.35 – 7.22 (m, 5H), 7.22 – 7.09 (m, 4H), 6.95 (d,  $J$  = 9.1 Hz, 1H), 6.19 (d,  $J$  = 1 Hz, 1H), 3.24 (s, 3H).  $^{13}\text{C}$  NMR (126 MHz, DMSO- $d_6$ )  $\delta$  174.31, 157.40, 155.65, 153.80, 148.06, 147.71, 143.86, 138.11, 136.58, 135.59, 134.65, 134.59, 133.61, 133.44, 133.30, 131.40, 131.21, 130.99, 130.38, 129.57, 127.25, 126.05, 125.14, 124.08, 122.92, 121.48, 121.01, 118.36, 116.74, 114.60, 110.60, 106.80, 54.61. HRMS (ESI)  $m/z$   $[\text{M} + \text{H}]^+$  calculated for  $\text{C}_{39}\text{H}_{22}\text{Br}_4\text{NO}_4^+$ : 883.8277, found: 883.8276

*2-Fluoro-9,10,15-triphenyl-6H,7H-chromeno[4',3':4,5]pyrido[2,1-a]isoquinoline-6,7-dione (3da)*

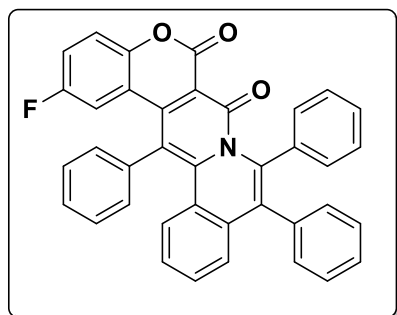

$^1\text{H}$  NMR (500 MHz, DMSO- $d_6$ )  $\delta$  7.67 – 7.60 (m, 1H), 7.61 – 7.51 (m, 4H), 7.49 – 7.43 (m, 1H), 7.37 (m, 2H), 7.34 – 7.24 (m, 3H), 7.23 – 7.16 (m, 5H), 7.07 (m, 5H), 6.30 – 6.22 (m, 1H).  $^{13}\text{C}$  NMR (126 MHz, DMSO- $d_6$ )  $\delta$  157.78, 156.58 (d,  $J$  = 237.9 Hz), 155.66, 150.08, 146.48 (d,  $J$  = 1.9 Hz), 145.07, 138.94, 136.54, 135.86, 134.94, 134.28, 132.52, 131.44, 131.17, 130.66, 129.59, 129.22, 129.19, 128.80, 128.20, 127.66, 127.52, 127.32, 126.53, 125.60, 125.07, 119.98 (d,  $J$  = 24.4 Hz), 119.00 (d,  $J$  = 8.4 Hz), 118.08 (d,  $J$  = 9.1 Hz), 115.30, 114.40 (d,  $J$  = 28.2 Hz), 105.78. HRMS (ESI)  $m/z$   $[\text{M} + \text{Na}]^+$  calculated for  $\text{C}_{38}\text{H}_{22}\text{FNNaO}_3^+$ : 582.1476, found: 582.1477

*2-Fluoro-12-methyl-9,10,15-tri-p-tolyl-6H,7H-chromeno[4',3':4,5]pyrido[2,1a]isoquinoline-6,7-dione (3db)*

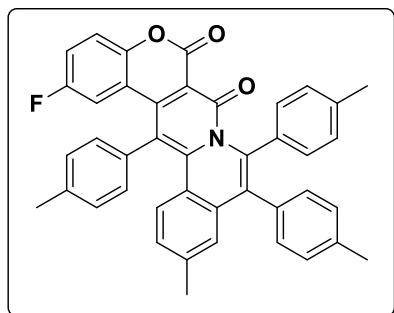

$^1\text{H}$  NMR (500 MHz,  $\text{CDCl}_3$ )  $\delta$  7.37 – 7.32 (m, 2H), 7.29 (d,  $J = 8.0$  Hz, 2H), 7.22 (dd,  $J = 9.0, 5.1$  Hz, 1H), 7.14 – 6.99 (m, 9H), 6.88 (d,  $J = 7.9$  Hz, 2H), 6.84 – 6.78 (m, 1H), 6.43 – 6.35 (m, 1H), 2.52 (s, 3H), 2.35 (s, 3H), 2.27 (s, 3H), 2.21 (s, 3H).  $^{13}\text{C}$  NMR (126 MHz,  $\text{CDCl}_3$ )  $\delta$  159.14, 157.33 (d,  $J = 240.6$  Hz), 156.92, 150.41, 146.36 (d,  $J = 2.4$  Hz), 146.25, 141.84, 139.55, 137.61, 137.41, 137.14, 136.28, 135.32, 132.92, 132.35, 132.26, 131.49, 131.13, 129.41, 129.22, 128.94, 128.53, 127.85, 125.95, 123.14, 119.45 (d,  $J = 24.4$  Hz), 118.78 (d,  $J = 8.4$  Hz), 118.46 (d,  $J = 9.1$  Hz), 115.26, 115.04, 114.64, 105.35, 21.80, 21.66, 21.46. HRMS (ESI)  $m/z$   $[\text{M} + \text{H}]^+$  calculated for  $\text{C}_{42}\text{H}_{31}\text{FNO}_3^+$ : 616.2282, found: 616.2285

*12-Bromo-9,10,15-tris(4-bromophenyl)-2-fluoro-6H,7H-chromeno[4',3':4,5]pyrido[2,1a]isoquinoline-6,7-dione (3df)*

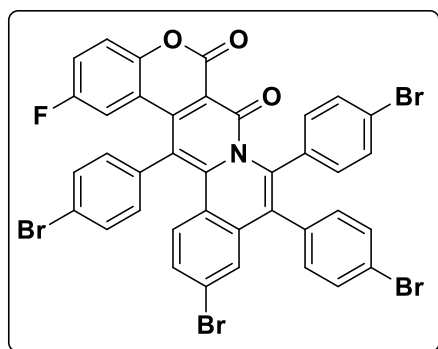

$^1\text{H}$  NMR (500 MHz,  $\text{DMSO-}d_6$ )  $\delta$  7.82 (d,  $J = 8.4$  Hz, 2H), 7.58 (d,  $J = 8.4$  Hz, 2H), 7.53 (d,  $J = 8.4$  Hz, 2H), 7.48 – 7.41 (m, 3H), 7.35 (d,  $J = 8.5$  Hz, 2H), 7.29 – 7.16 (m, 5H), 7.00 (d,  $J = 9.0$  Hz, 1H), 6.38 – 6.16 (m, 1H).  $^{13}\text{C}$  NMR (126 MHz,  $\text{DMSO-}d_6$ )  $\delta$  157.90, 156.71 (d,  $J = 245.2$  Hz), 156.00, 150.53, 147.24, 144.58, 138.03, 137.05, 136.02, 135.02, 134.90, 134.12, 133.81, 133.72, 131.87, 131.68, 131.45, 130.84, 130.13, 127.76, 126.79, 125.78, 124.44, 123.50, 121.98, 121.53, 120.68 (d,  $J = 22.5$  Hz), 119.60 (d,  $J = 8.7$  Hz), 118.05 (d,  $J = 9.1$  Hz), 114.90, 114.42 (d,  $J = 27.8$  Hz), 107.12. HRMS (ESI)  $m/z$   $[\text{M} + \text{H}]^+$  calculated for  $\text{C}_{38}\text{H}_{19}\text{Br}_4\text{FNO}_3^+$ : 871.8077, found: 871.807



*2-Chloro-9,10,15-triphenyl-6H,7H-chromeno[4',3':4,5]pyrido[2,1-a]isoquinoline-6,7-dione (3ea)*

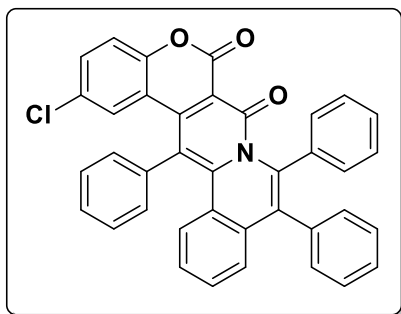

$^1\text{H}$  NMR (500 MHz,  $\text{DMSO-}d_6$ )  $\delta$  7.70 – 7.41 (m, 7H), 7.39 – 7.14 (m, 9H), 7.16 – 7.01 (m, 5H), 6.54 (d,  $J = 2.4$  Hz, 1H).  $^{13}\text{C}$  NMR (126 MHz,  $\text{DMSO-}d_6$ )  $\delta$  157.57, 155.27, 152.22, 146.16, 144.99, 138.93, 136.45, 135.75, 134.84, 134.17, 132.34, 132.00, 131.35, 131.07, 130.50, 129.65, 129.40, 129.11, 128.67, 128.25, 128.07, 127.52, 127.37, 127.18, 126.65, 126.42, 125.51, 124.95, 118.96, 118.37, 115.12, 105.71. HRMS (ESI)  $m/z$   $[\text{M} + \text{H}]^+$  calculated for  $\text{C}_{38}\text{H}_{23}\text{ClNO}_3^+$ : 576.1361, found: 576.1354

*2-Chloro-12-methyl-9,10,15-tri-p-tolyl-6H,7H-chromeno[4',3':4,5]pyrido[2,1-a]isoquinoline-6,7-dione (3eb)*

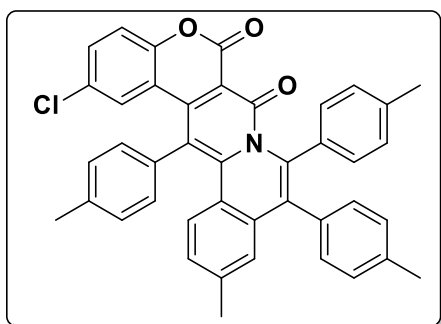

$^1\text{H}$  NMR (500 MHz,  $\text{DMSO-}d_6$ )  $\delta$  7.50 (dd,  $J = 8.8, 2.5$  Hz, 1H), 7.38 (d,  $J = 2.8$  Hz, 4H), 7.32 (d,  $J = 8.8$  Hz, 1H), 7.15 – 7.01 (m, 7H), 6.99 – 6.91 (m, 2H), 6.88 (d,  $J = 8.0$  Hz, 2H), 6.50 (d,  $J = 2.4$  Hz, 1H), 2.45 (s, 3H), 2.28 (s, 3H), 2.20 (s, 3H), 2.17 (s, 3H).  $^{13}\text{C}$  NMR (126 MHz,  $\text{DMSO-}d_6$ )  $\delta$  157.71, 155.31, 152.09, 145.94, 145.35, 141.60, 138.87, 136.63, 136.48, 136.40, 136.01, 134.59, 133.03, 132.08, 131.93, 131.77, 130.99, 130.87, 128.95, 128.71, 128.43, 128.27, 127.82, 127.68, 126.60, 125.20, 122.78, 118.80, 118.43, 114.87, 114.35, 104.72, 21.12, 20.98, 20.80, 20.74. HRMS (ESI)  $m/z$   $[\text{M} + \text{H}]^+$  calculated for  $\text{C}_{42}\text{H}_{31}\text{ClNO}_3^+$ : 632.1987, found: 632.1989

*2-Chloro-12-fluoro-9,10,15-tris(4-fluorophenyl)-6H,7H-chromeno[4',3':4,5]pyrido[2,1-a]isoquinoline-6,7-dione (3ed)*

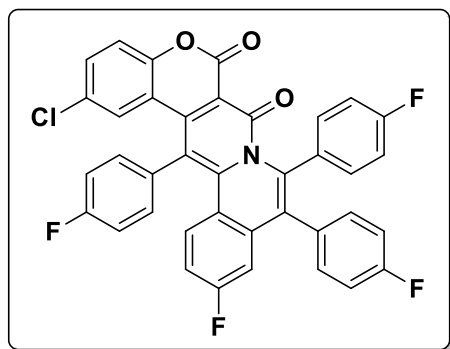

$^1\text{H}$  NMR (500 MHz,  $\text{DMSO-}d_6$ )  $\delta$  7.67 – 7.54 (m, 3H), 7.52 – 7.44 (m, 2H), 7.38 (d,  $J = 8.8$  Hz, 1H), 7.33 – 7.23 (m, 4H), 7.21 – 7.14 (m, 4H), 7.07 – 6.93 (m, 2H), 6.89 – 6.78 (m, 1H), 6.51 (d,  $J = 2.4$  Hz, 1H).  $^{13}\text{C}$  NMR (126 MHz,  $\text{DMSO-}d_6$ )  $\delta$  162.87 (d,  $J = 247.7$  Hz), 162.84 (d,  $J = 252.6$  Hz), 161.50 (d,  $J = 244.9$  Hz), 161.20 (d,  $J = 245.0$  Hz), 157.35, 155.20, 152.27, 146.57, 144.59, 136.95, 136.89, 135.02 (d,  $J = 3.2$  Hz), 134.51 (d,  $J = 7.9$  Hz), 133.16 (d,  $J = 8.2$  Hz), 132.22 (d,  $J = 9.5$  Hz), 132.15, 131.85 (d,  $J = 2.9$  Hz), 131.28 (d,  $J = 8.0$  Hz), 130.56 (d,  $J = 2.6$  Hz), 127.97, 127.16 (d,  $J = 1.9$  Hz), 126.71, 121.73, 119.10, 118.18, 117.72 (d,  $J = 21.5$  Hz), 115.35 (d,  $J = 21.5$  Hz), 115.01 (d,  $J = 22.9$  Hz), 114.32 (d,  $J = 21.6$  Hz), 113.94, 110.62 (d,  $J = 23.0$  Hz), 105.87. HRMS (ESI)  $m/z$   $[\text{M} + \text{H}]^+$  calculated for  $\text{C}_{38}\text{H}_{19}\text{F}_4\text{NO}_3^+$ : 648.0984, found: 648.0988

*12-Bromo-9,10,15-tris(4-bromophenyl)-2-chloro-6H,7H-chromeno[4',3':4,5]pyrido[2,1-a]isoquinoline-6,7-dione (3ef)*

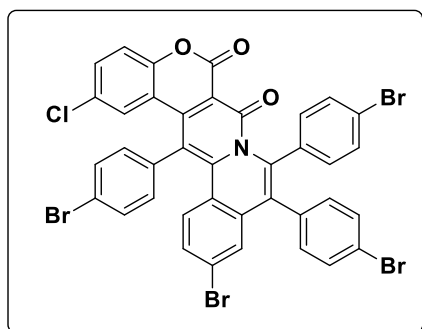

$^1\text{H}$  NMR (500 MHz,  $\text{DMSO-}d_6$ )  $\delta$  7.83 (d,  $J = 8.4$  Hz, 2H), 7.61 – 7.56 (m, 3H), 7.52 (d,  $J = 8.4$  Hz, 2H), 7.46 – 7.43 (m, 1H), 7.41 – 7.33 (m, 3H), 7.27 – 7.21 (m, 3H), 7.19 (d,  $J = 8.5$  Hz, 2H), 7.06 (d,  $J = 9.0$  Hz, 1H), 6.46 (d,  $J = 2.4$  Hz, 1H).  $^{13}\text{C}$  NMR (126 MHz,  $\text{DMSO-}d_6$ )  $\delta$  157.16, 155.11, 152.27, 146.58, 144.16, 137.69, 136.61, 135.54, 134.58, 134.36, 133.63, 133.33, 133.25, 132.29, 131.42, 131.21, 131.02, 130.38, 129.69, 127.96, 127.32, 126.78, 126.38, 125.38, 123.97, 123.09, 121.53, 121.08, 119.13, 117.98, 114.42, 106.59. HRMS (ESI)  $m/z$   $[\text{M} + \text{H}]^+$  calculated for  $\text{C}_{38}\text{H}_{19}\text{Br}_4\text{ClNO}_3^+$ : 887.7781, found: 887.7778

*9,10,15-Triphenyl-2-(trifluoromethyl)-6H,7H-chromeno[4',3':4,5]pyrido[2,1-a]isoquinoline-6,7-dione (3fa)*

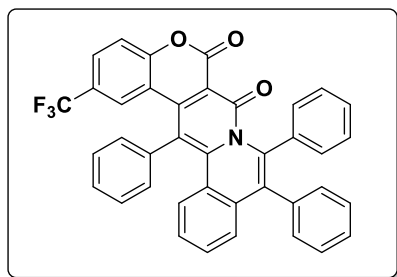

$^1\text{H}$  NMR (500 MHz,  $\text{DMSO-}d_6$ )  $\delta$  7.82 (dd,  $J = 8.7$ , 2.0 Hz, 1H), 7.65 – 7.55 (m, 5H), 7.55 – 7.47 (m, 2H), 7.37 – 7.20 (m, 8H), 7.17 – 7.07 (m, 5H), 7.01 (d,  $J = 1.0$  Hz, 1H).  $^{13}\text{C}$  NMR (126 MHz,  $\text{DMSO-}d_6$ )  $\delta$  157.54, 155.80, 155.09, 146.23, 145.28, 138.90, 136.48, 135.73, 134.83, 134.20, 132.28, 132.22, 131.44, 131.06, 130.55, 129.66, 129.39, 129.13, 129.00, 128.78, 128.65, 128.08, 127.54, 127.39, 127.18, 126.44, 126.35, 125.54, 124.96, 118.44, 117.41, 115.19, 105.75. HRMS (ESI)  $m/z$   $[\text{M} + \text{H}]^+$  calculated for  $\text{C}_{39}\text{H}_{23}\text{F}_3\text{NO}_3^+$ : 610.1625, found: 610.1625

*3-Methyl-9,10,15-triphenyl-6H,7H-chromeno[4',3':4,5]pyrido[2,1-a]isoquinoline-6,7-dione (3ga)*

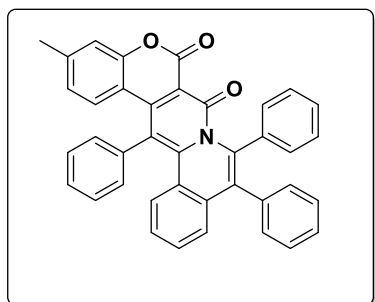

$^1\text{H}$  NMR (600 MHz,  $\text{DMSO-}d_6$ )  $\delta$  7.62 (t,  $J = 7.2$  Hz, 1H), 7.59 – 7.51 (m, 4H), 7.51 – 7.45 (m, 1H), 7.32 (t,  $J = 7.2$  Hz, 3H), 7.30 – 7.25 (m, 1H), 7.25 – 7.17 (m, 6H), 7.16 – 7.13 (m, 1H), 7.11 – 7.05 (m, 4H), 6.39 (d,  $J = 1.0$  Hz, 1H), 1.88 (s, 3H).  $^{13}\text{C}$  NMR (151 MHz,  $\text{DMSO-}d_6$ )  $\delta$  157.71, 155.72, 151.59, 147.55, 144.54, 139.46, 136.38, 135.83, 134.90, 134.11, 133.23, 132.43, 131.33, 131.12, 131.07, 130.20, 129.05, 128.97, 128.28, 128.02, 127.44, 127.27, 127.15, 126.28, 125.41, 125.02, 116.68, 116.47, 115.29, 105.83, 20.42. HRMS (ESI)  $m/z$   $[\text{M} + \text{H}]^+$  calculated for  $\text{C}_{39}\text{H}_{26}\text{NO}_3^+$ : 556.1907, found: 556.1908

*3,12-Dimethyl-9,10,15-tri-p-tolyl-6H,7H-chromeno[4',3':4,5]pyrido[2,1-a]isoquinoline-6,7-dione (3gb)*

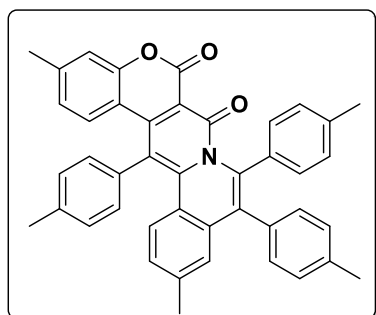

$^1\text{H}$  NMR (500 MHz,  $\text{DMSO-}d_6$ )  $\delta$  7.35 (s,4H), 7.23 – 7.01 (m, 7H), 7.00 – 6.80 (m, 5H), 6.75 – 6.53 (m, 2H), 2.45 (s, 3H), 2.29 (s, 3H), 2.28 (s,3H), 2.20 (s, 3H), 2.18 (s, 3H).  $^{13}\text{C}$  NMR (126 MHz,  $\text{DMSO}$ )  $\delta$  157.90, 155.83, 153.59, 147.62, 145.09, 143.43, 141.28, 138.45, 136.59, 136.46, 136.34, 134.59, 133.19, 132.16, 132.09, 130.95, 128.99, 128.73, 128.42, 127.97, 127.85, 127.54, 125.17, 123.80, 122.93, 117.03, 116.88, 114.51, 114.48, 104.56, 21.13, 21.09, 20.85, 20.79, 20.73. HRMS (ESI)  $m/z$   $[\text{M} + \text{H}]^+$  calculated for  $\text{C}_{43}\text{H}_{34}\text{NO}_3^+$ : 612.2553, found: 612.2534

*12-Chloro-9,10,15-tris(4-chlorophenyl)-3-methyl-6H,7H-chromeno[4',3':4,5]pyrido[2,1-a]isoquinoline-6,7-dione (3ge)*

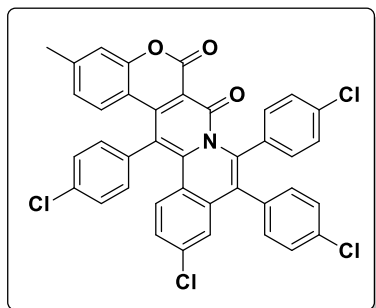

$^1\text{H}$  NMR (500 MHz,  $\text{DMSO-}d_6$ )  $\delta$  7.65 – 7.61 (m, 2H), 7.58 – 7.51 (m,2H), 7.43 (d,  $J = 8.5$  Hz,2H), 7.32 (d,  $J = 8.4$  Hz,2H), 7.30 – 7.26 (m, 1H), 7.25 – 7.22 (m, 2H), 7.26 – 7.16 (m, 3H), 7.06 (d,  $J = 2.2$  Hz, 1H), 6.99 (d,  $J = 9.0$  Hz, 1H), 6.79 – 6.71 (m, 1H), 6.54 (d,  $J = 8.5$  Hz, 1H), 2.31 (s,3H).  $^{13}\text{C}$  NMR (126 MHz,  $\text{DMSO-}d_6$ )  $\delta$  157.35, 155.59, 153.73, 148.24, 144.07, 143.84, 137.77, 136.64, 136.01, 135.55, 134.35, 134.14, 134.11, 133.09, 133.01, 132.75, 132.21, 130.93, 130.57, 128.48, 128.16, 127.45, 126.72, 126.03, 124.16, 124.08, 123.79, 117.23, 114.52, 114.02, 106.14, 20.80. HRMS (ESI)  $m/z$   $[\text{M} + \text{H}]^+$  calculated for  $\text{C}_{39}\text{H}_{22}\text{Cl}_4\text{NO}_3^+$ : 692.0348, found: 692.0348

*1,2-Dibutyl-4H-chromeno[3,4-c]pyridine-4,5(3H)-dione (3ah)*

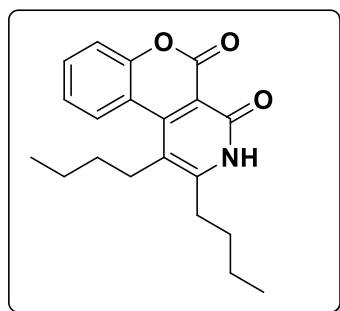

$^1\text{H}$  NMR (500 MHz,  $\text{DMSO-}d_6$ )  $\delta$  12.28 (s, 1H), 8.00 (dd,  $J = 17.0, 4.3$  Hz, 1H), 7.54 (d,  $J = 6.9$  Hz, 1H), 7.27 (s, 2H), 2.69 (d,  $J = 62.2$  Hz, 4H), 1.77 – 1.30 (m, 8H), 1.07 – 0.84 (m, 6H).  $^{13}\text{C}$  NMR (126 MHz,  $\text{DMSO-}d_6$ )  $\delta$  159.13, 156.74, 156.04, 152.61, 150.63, 132.03, 127.27, 123.12, 117.05, 111.60, 107.31, 31.90, 31.17, 30.60, 28.02, 22.04, 21.96, 13.32, 13.27. HRMS (ESI)  $m/z$   $[\text{M} + \text{H}]^+$  calculated for  $\text{C}_{20}\text{H}_{24}\text{NO}_3^+$ : 326.1751, found:326.1751

*1,2-Dipentyl-4H-chromeno[3,4-c]pyridine-4,5(3H)-dione (3ai)*

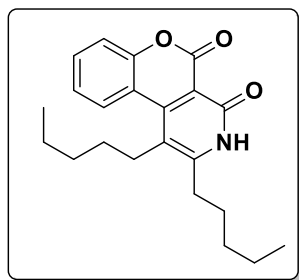

$^1\text{H}$  NMR (500 MHz,  $\text{DMSO-}d_6$ )  $\delta$  12.22 (s, 1H), 8.03 (d,  $J = 7.9$  Hz, 1H), 7.62 (t,  $J = 7.6$  Hz, 1H), 7.33 (d,  $J = 7.7$  Hz, 2H), 2.67 (d,  $J = 54.3$  Hz, 4H), 1.58 (d,  $J = 5.6$  Hz, 4H), 1.41 – 1.26 (m, 8H), 0.87 (t,  $J = 6.3$  Hz, 6H).  $^{13}\text{C}$  NMR (126 MHz,  $\text{DMSO-}d_6$ )  $\delta$  158.64, 156.26, 153.08, 152.69, 150.58, 132.63, 127.59, 123.66, 117.35, 117.04, 111.50, 107.40, 31.10, 31.03, 29.41, 28.82, 28.27, 21.70, 21.59, 13.85, 13.77.

HRMS (ESI)  $m/z$   $[\text{M} + \text{H}]^+$  calculated for  $\text{C}_{22}\text{H}_{28}\text{NO}_3^+$ : 354.2064, found:354.2062

*1,2-Dibutyl-9-methyl-4H-chromeno[3,4-c]pyridine-4,5(3H)-dione (3bh)*

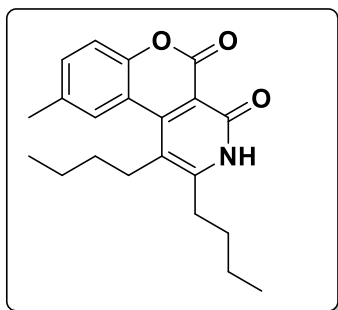

$^1\text{H}$  NMR (500 MHz,  $\text{CDCl}_3$ )  $\delta$  8.04 (d,  $J = 8.4$  Hz, 1H), 7.23 – 7.16 (m, 2H), 3.04 – 2.80 (m, 4H), 2.47 (s, 3H), 1.83 – 1.65 (m, 4H), 1.63 – 1.44 (m, 4H), 1.10 – 0.95 (m, 6H).  $^{13}\text{C}$  NMR (126 MHz,  $\text{CDCl}_3$ )  $\delta$  163.54, 152.23, 143.33, 127.46, 125.88, 118.44, 115.28, 31.75, 31.68, 29.71, 29.30, 22.98, 22.84, 21.29, 13.92, 13.77. HRMS (ESI)  $m/z$   $[\text{M} + \text{H}]^+$  calculated for  $\text{C}_{21}\text{H}_{26}\text{NO}_3^+$ : 340.1907, found:340,1901

*1,2-Dibutyl-9-fluoro-4H-chromeno[3,4-c]pyridine-4,5(3H)-dione (3dh)*

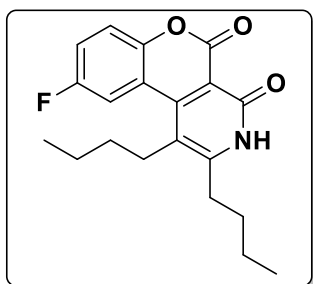

$^1\text{H}$  NMR (400 MHz,  $\text{CDCl}_3$ )  $\delta$  8.07 – 7.78 (m, 1H), 7.36 (ddd,  $J = 15.7, 11.2, 6.1$  Hz, 2H), 3.07 – 2.80 (m, 4H), 1.86 – 1.69 (m, 4H), 1.66 – 1.47 (m, 4H), 1.14 – 0.94 (m, 6H).  $^{13}\text{C}$  NMR (126 MHz,  $\text{DMSO}-d_6$ ) 163.03, 158.32 (d,  $J = 242.9$  Hz), 147.95, 119.20 (d,  $J = 8.6$  Hz), 118.89 (d,  $J = 23.8$  Hz), 113.59 (d,  $J = 27.1$  Hz), 34.61, 31.27, 31.14, 28.54, 22.50, 22.23, 13.43, 13.21. HRMS (ESI)  $m/z$   $[\text{M} + \text{H}]^+$  calculated for  $\text{C}_{20}\text{H}_{23}\text{FNO}_3^+$ : 344.1656, found:344.16551.

*9-Fluoro-1,2-dipentyl-4H-chromeno[3,4-c]pyridine-4,5(3H)-dione (3di)*

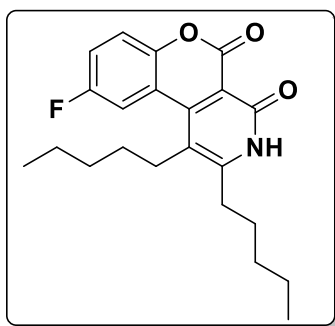

$^1\text{H}$  NMR (500 MHz,  $\text{DMSO}-d_6$ )  $\delta$  12.32 (s, 1H), 7.73 (d,  $J = 11.0$  Hz, 1H), 7.54 (t,  $J = 7.0$  Hz, 1H), 7.41 (d,  $J = 4.7$  Hz, 1H), 2.67 (d,  $J = 40.2$  Hz, 4H), 1.58 (s, 4H), 1.47 – 1.25 (m, 8H), 0.92 – 0.80 (m, 6H).  $^{13}\text{C}$  NMR (126 MHz,  $\text{DMSO}-d_6$ )  $\delta$  175.35, 159.40, 158.57 (d,  $J = 268.5$  Hz), 157.71, 157.14, 150.45 (d,  $J = 42.1$  Hz), 120.97 (d,  $J = 23.6$  Hz), 120.22 (d,  $J = 7.8$  Hz), 118.87 (d,  $J = 8.0$  Hz), 114.50 (d,  $J = 26.8$  Hz), 112.53, 108.62, 32.17, 32.04, 30.23, 29.93, 29.80, 29.01, 22.79, 22.59, 14.90, 14.85. HRMS (ESI)  $m/z$   $[\text{M} + \text{H}]^+$  calculated for  $\text{C}_{22}\text{H}_{27}\text{FNO}_3^+$ : 372.1969, found:372.1971.

*1,2-Dibutyl-9-chloro-4H-chromeno[3,4-c]pyridine-4,5(3H)-dione (3eh)*

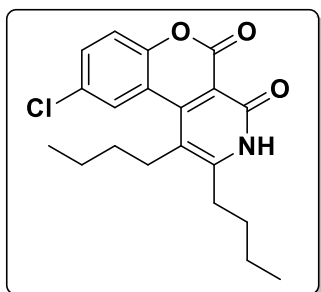

$^1\text{H}$  NMR (500 MHz,  $\text{DMSO}-d_6$ )  $\delta$  12.31 (s, 1H), 7.95 (s, 1H), 7.67 (d,  $J = 8.0$  Hz, 1H), 7.37 (d,  $J = 7.6$  Hz, 1H), 2.65 (d,  $J = 26.6$  Hz, 4H), 1.74 – 1.32 (m, 8H), 0.98 – 0.80 (m, 6H).  $^{13}\text{C}$  NMR (126 MHz,  $\text{DMSO}-d_6$ )  $\delta$  158.48, 156.87, 155.82, 151.54, 149.37, 132.21, 127.48, 127.02, 119.29, 118.36, 111.31, 107.52, 31.72, 31.31, 30.64, 27.87, 22.13, 21.95, 13.58, 13.49. HRMS (ESI)  $m/z$   $[\text{M} + \text{H}]^+$  calculated for  $\text{C}_{20}\text{H}_{23}\text{ClNO}_3^+$ : 360.1361, found:360.1364.

10,15-Dimethyl-9-phenyl-6*H*,7*H*-chromeno[4',3':4,5]pyrido[2,1-*a*]isoquinoline-6,7-dione (**3aj**)

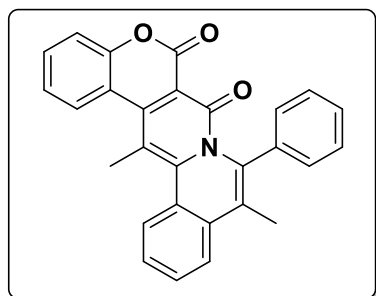

$^1\text{H}$  NMR (600 MHz, DMSO)  $\delta$  8.60 (d,  $J = 8.3$  Hz, 1H), 8.44 (d,  $J = 8.2$  Hz, 1H), 7.97 (d,  $J = 8.0$  Hz, 1H), 7.87 (t,  $J = 7.5$  Hz, 1H), 7.74 (t,  $J = 7.6$  Hz, 1H), 7.70 – 7.63 (m, 1H), 7.49 – 7.19 (m, 7H), 3.00 (s, 3H), 2.20 (s, 3H).  $^{13}\text{C}$  NMR (126 MHz, DMSO)  $\delta$  157.84, 156.07, 153.15, 148.45, 146.78, 136.72, 134.80, 134.22, 132.69, 132.05, 130.04, 129.51, 128.57, 127.74, 127.53, 127.37, 125.82, 124.28, 123.60, 121.85, 117.29, 117.16, 106.01, 104.44, 24.55, 15.03. HRMS (ESI)  $m/z$   $[\text{M} + \text{H}]^+$  calculated for  $\text{C}_{28}\text{H}_{20}\text{NO}_3^+$ : 418.1438, found: 418.1442.

Diethyl 4,5-dioxo-3,5-dihydro-4*H*-chromeno[3,4-*c*]pyridine-1,2-dicarboxylate (**3ak**)

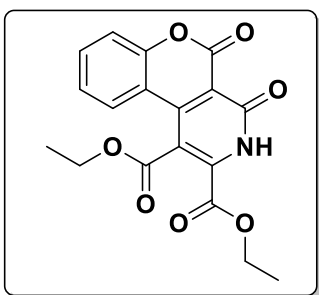

$^1\text{H}$  NMR (500 MHz, DMSO-*d*6)  $\delta$  8.15 – 7.84 (m, 1H), 7.82 – 7.60 (m, 1H), 7.56 – 7.30 (m, 2H), 4.59 – 3.91 (m, 2H), 3.33 (s, 2H), 1.57 – 1.26 (m, 6H).  $^{13}\text{C}$  NMR (126 MHz,  $\text{CDCl}_3$ )  $\delta$  166.84, 160.32, 133.57, 125.91, 125.16, 118.04, 114.90, 93.18, 90.50, 89.10, 63.68, 62.52, 21.59. HRMS (ESI)  $m/z$   $[\text{M} + \text{Na}]^+$  calculated for  $\text{C}_{18}\text{H}_{15}\text{NNaO}_7^+$ : 380.0741, found: 380.0744.

## VII. X-ray Crystallographic Data

### (1) The Single Crystal Structure of **3aa** (Deposition No. CCDC 2240822)

Crystal Data for  $C_{38}H_{23}NO_3$  ( $M=541.57$  g/mol): triclinic, space group P-1 (no. 2),  $a = 12.1985(15)$  Å,  $b = 13.3130(18)$  Å,  $c = 28.790(5)$  Å,  $\alpha = 78.149(7)^\circ$ ,  $\beta = 79.050(5)^\circ$ ,  $\gamma = 84.650(7)^\circ$ ,  $V = 4485.3(12)$  Å<sup>3</sup>,  $Z = 6$ ,  $T = 150$  K,  $\mu(\text{MoK}\alpha) = 0.076$  mm<sup>-1</sup>,  $D_{\text{calc}} = 1.203$  g/cm<sup>3</sup>, 45382 reflections measured ( $3.938^\circ \leq 2\Theta \leq 50.212^\circ$ ), 15810 unique ( $R_{\text{int}} = 0.0801$ ,  $R_{\text{sigma}} = 0.0967$ ) which were used in all calculations. The final  $R_1$  was 0.1104 ( $I > 2\sigma(I)$ ) and  $wR_2$  was 0.3675 (all data).

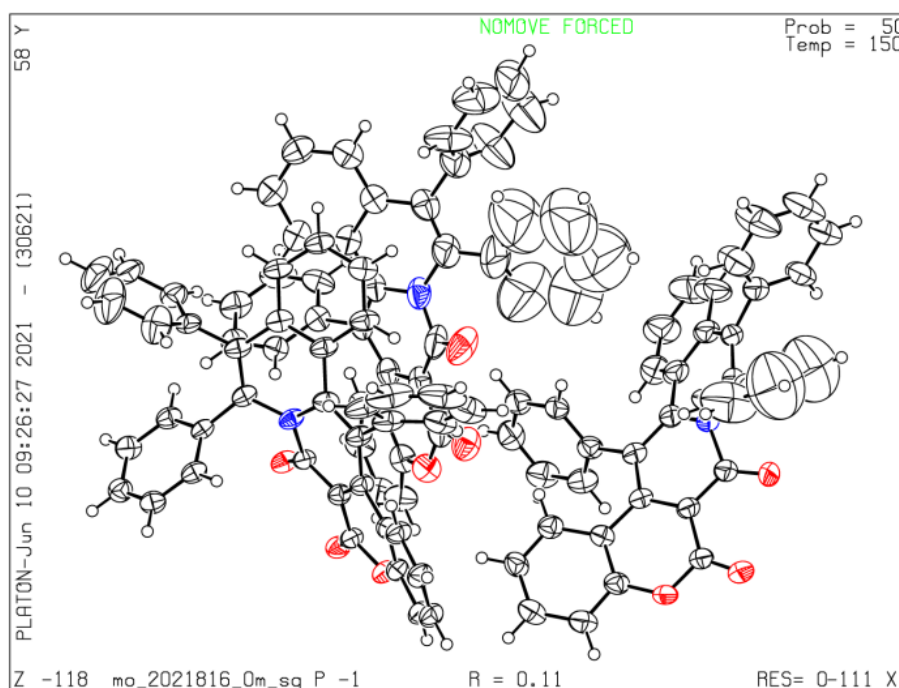

### (2) The Single Crystal Structure of **3ah** (Deposition No. CCDC 2240823)

Crystal Data for  $C_{20}H_{23}NO_3$  ( $M=325.39$  g/mol): monoclinic, space group  $P2_1/n$ ,  $a = 8.607(2)$  Å,  $b = 17.289(5)$  Å,  $c = 11.344(4)$  Å,  $\alpha = 90^\circ$ ,  $\beta = 95.054(10)^\circ$ ,  $\gamma = 90^\circ$ ,  $V = 1681.6(9)$  Å<sup>3</sup>,  $Z = 4$ ,  $T = 170$  K,  $\mu(\text{MoK}\alpha) = 0.086$  mm<sup>-1</sup>,  $D_{\text{calc}} = 1.285$  g/cm<sup>3</sup>, 18747 reflections measured ( $4.306^\circ \leq 2\Theta \leq 52.716^\circ$ ), 3436 unique ( $R_{\text{int}} = 0.0944$ ,  $R_{\text{sigma}} = 0.0788$ ) which were used in all calculations. The final  $R_1$  was 0.0605 ( $I > 2\sigma(I)$ ) and  $wR_2$  was 0.1419 (all data).



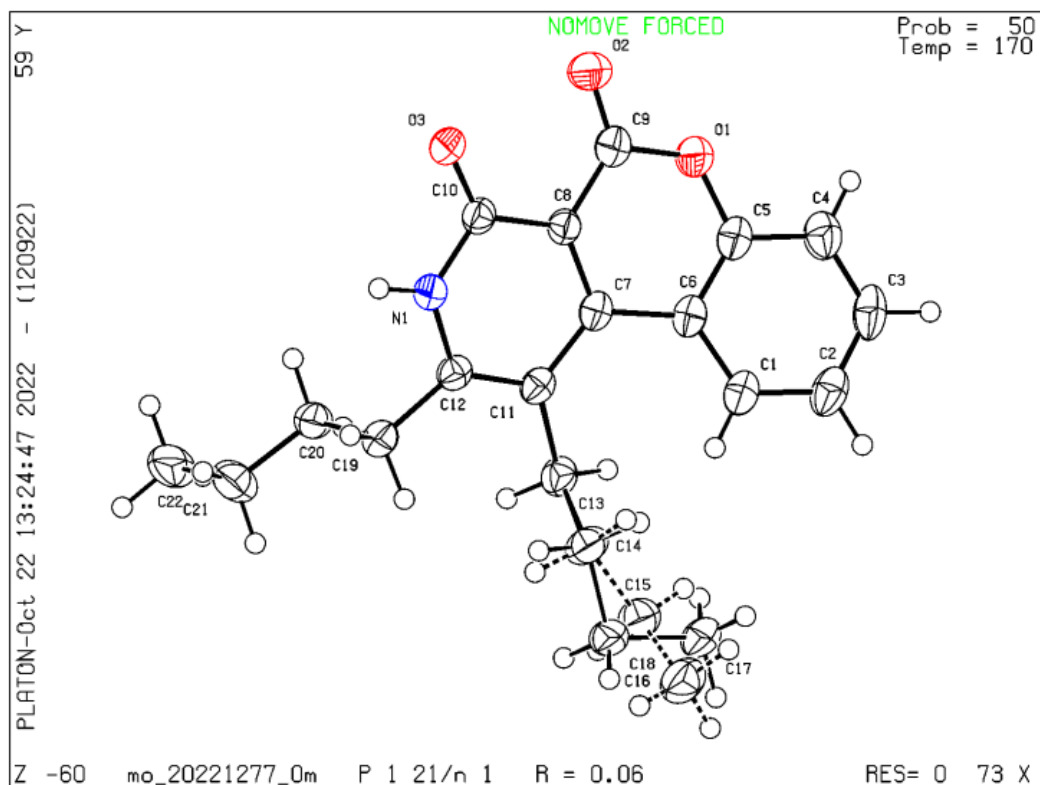

(3) The Single Crystal Structure of **4a** (*Deposition No.* CCDC 2241973)

Crystal Data for C<sub>38</sub>H<sub>23</sub>NO<sub>3</sub> (M = 541.57 g/mol): triclinic, space group P-1 (no. 2), a = 8.4094(3) Å, b = 16.0205(6) Å, c = 22.2191(10) Å,  $\alpha$  = 69.889(3)°,  $\beta$  = 85.532(2)°,  $\gamma$  = 77.428(2)°, V = 2743.5(2) Å<sup>3</sup>, Z = 4, T = 170.0 K,  $\mu$ (CuK $\alpha$ ) = 0.658 mm<sup>-1</sup>, D<sub>calc</sub> = 1.311 g/cm<sup>3</sup>, 8732 reflections measured (6° ≤ 2 $\Theta$  ≤ 127.364°), 8732 unique (R<sub>int</sub> = ?, R<sub>sigma</sub> = 0.1358) which were used in all calculations.

The final R1 was 0.0719 ( $I > 2\sigma(I)$ ) and wR2 was 0.1928 (all data).

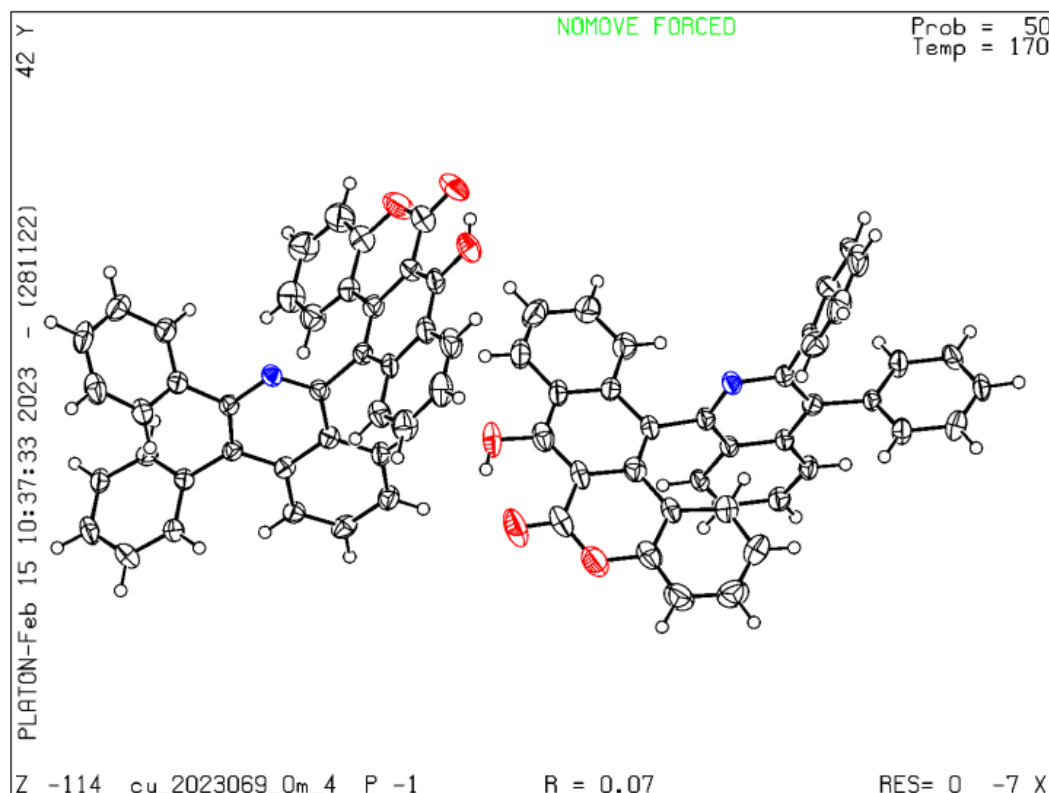

#### (4) The Single Crystal Structure of **3aj** (Deposition No. CCDC 2254040)

Crystal Data for  $C_{29}H_{21}Cl_2NO_3$  ( $M = 502.37$  g/mol): triclinic, space group P-1 (no. 2),  $a = 9.501(4)$  Å,  $b = 10.350(8)$  Å,  $c = 12.608(7)$  Å,  $\alpha = 69.54(2)^\circ$ ,  $\beta = 78.40(2)^\circ$ ,  $\gamma = 76.82(2)^\circ$ ,  $V = 1120.9(12)$  Å<sup>3</sup>,  $Z = 2$ ,  $T = 100$  K,  $\mu(\text{MoK}\alpha) = 0.325$  mm<sup>-1</sup>,  $D_{\text{calc}} = 1.488$  g/cm<sup>3</sup>, 12903 reflections measured ( $4.264^\circ \leq 2\theta \leq 25.000^\circ$ ),  $R = 0.0719$  ( $I > 2\sigma(I)$ ) and wR2 was 0.1917 (all data).

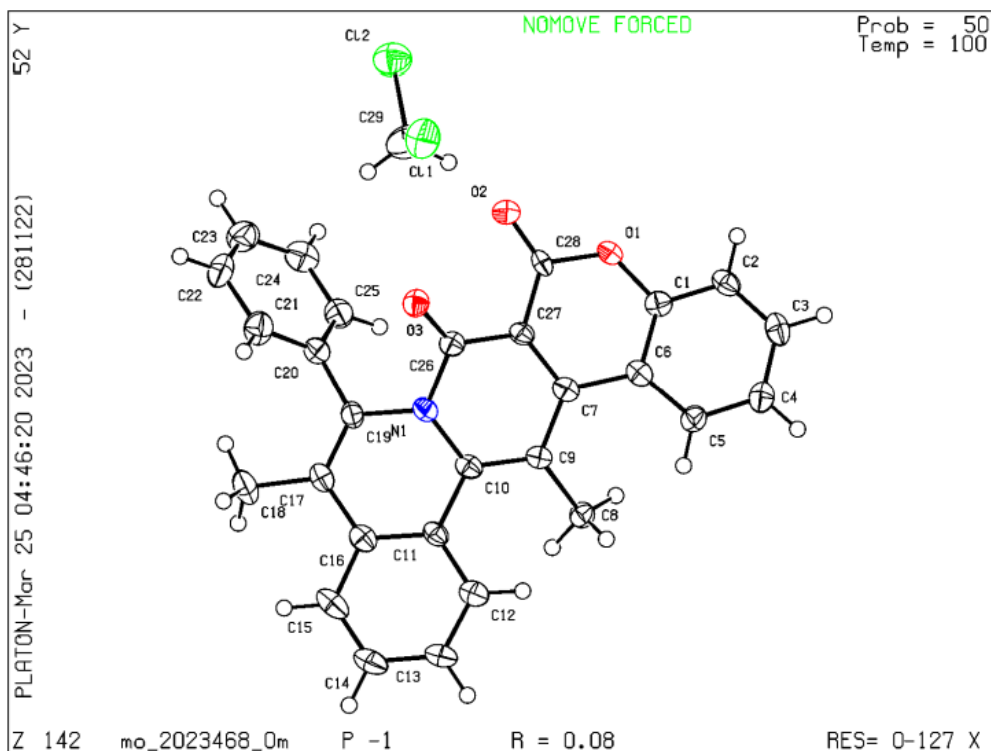

## VIII. Reference

(1) Fonseca, A.; Matos, M. J.; Reis, J.; Duarte, Y.; Gutiérrez, M.; Santana, L.; Uriarte, E.; Borges, F. *RSC Advances* **2016**, *6*, 49764.

(2) Park, K.; Bae, G.; Moon, J.; Choe, J.; Song, K. H.; Lee, S. *The Journal of Organic Chemistry* **2010**, *75*, 6244.

## IV. NMR Spectra and HR-MS Spectra of Substrates and Products

### *N*-methoxy-2-oxo-2H-chromene-3-carboxamide (1a)

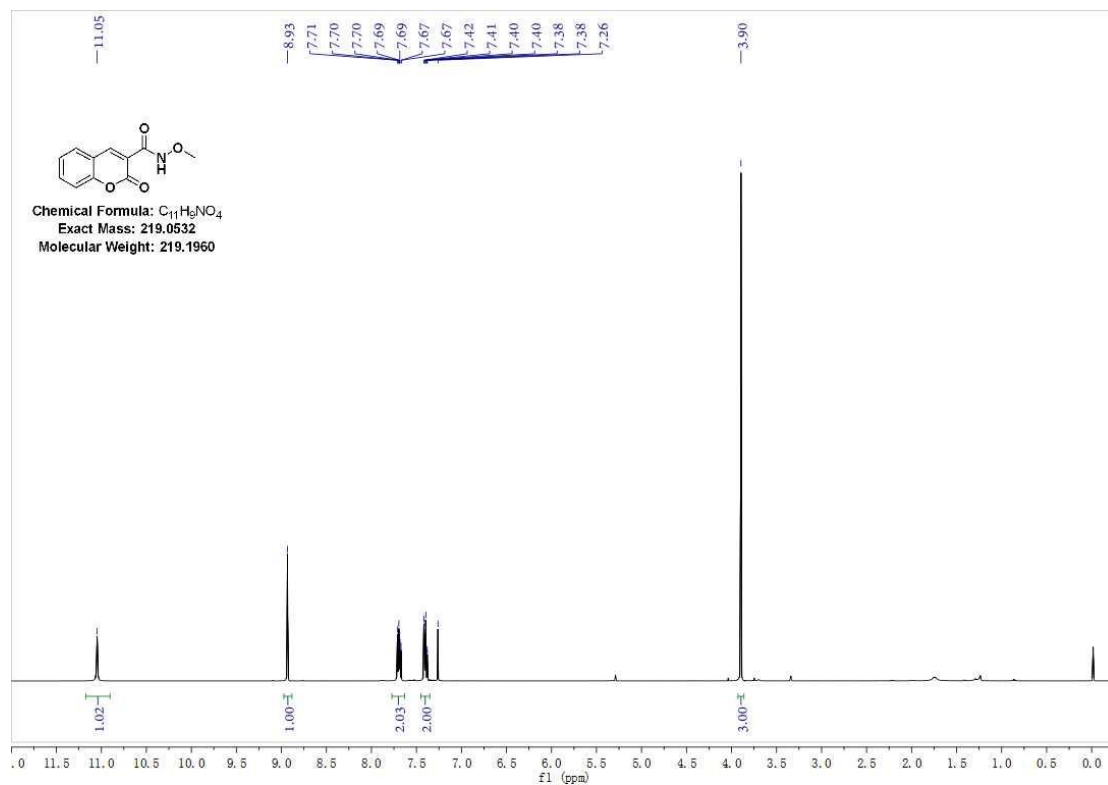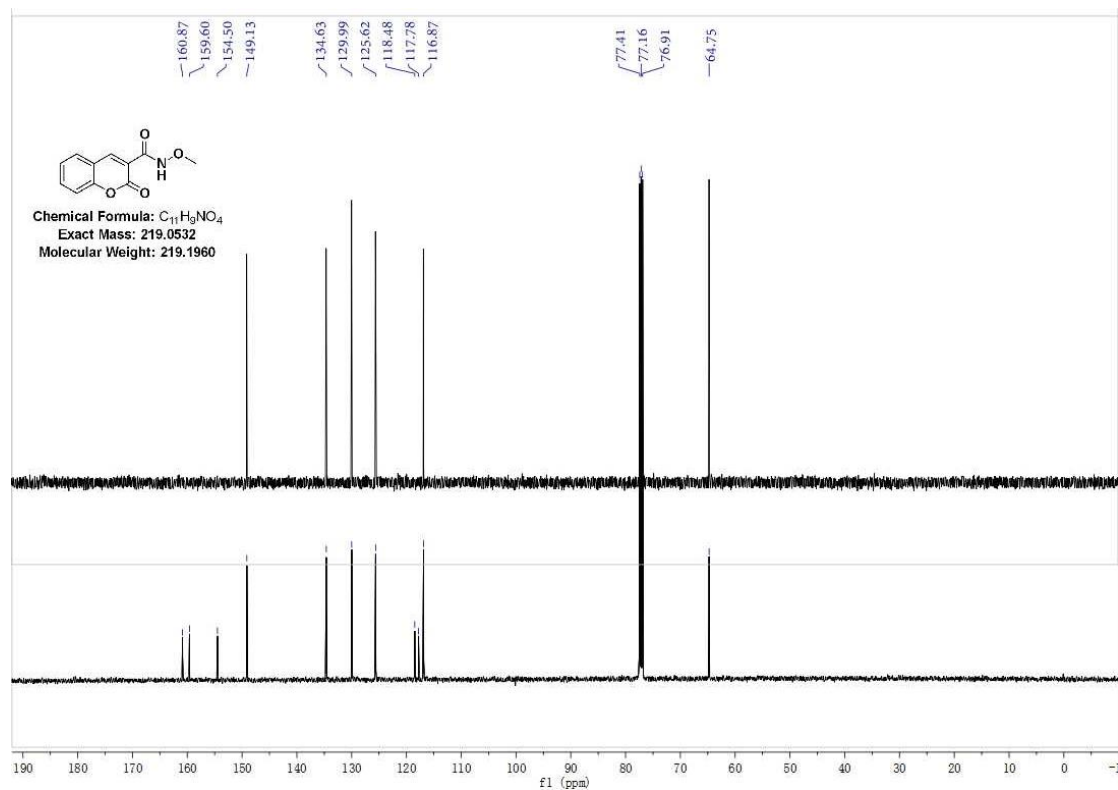

User Spectra

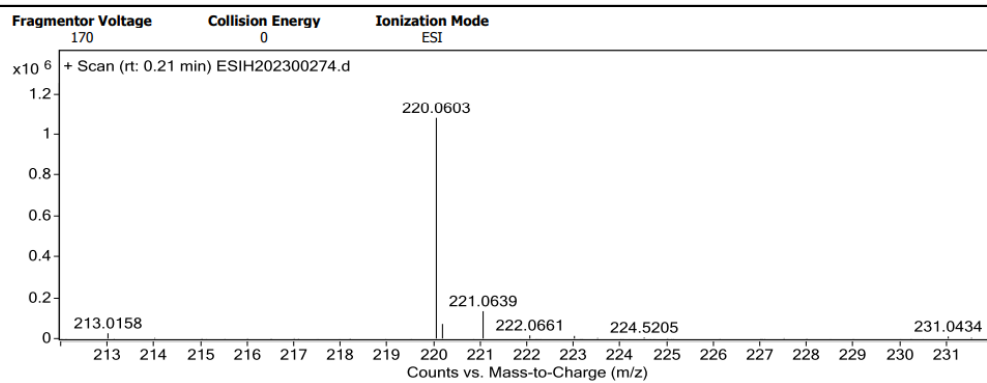

Formula Calculator Results

| m/z      | Calc m/z | Diff (mDa) | Diff (ppm) | Ion Formula  | Ion    |
|----------|----------|------------|------------|--------------|--------|
| 220.0603 | 220.0604 | 0.18       | 0.81       | C11 H10 N O4 | (M+H)+ |

*N*-methoxy-6-methyl-2-oxo-2H-chromene-3-carboxamide (**1b**)

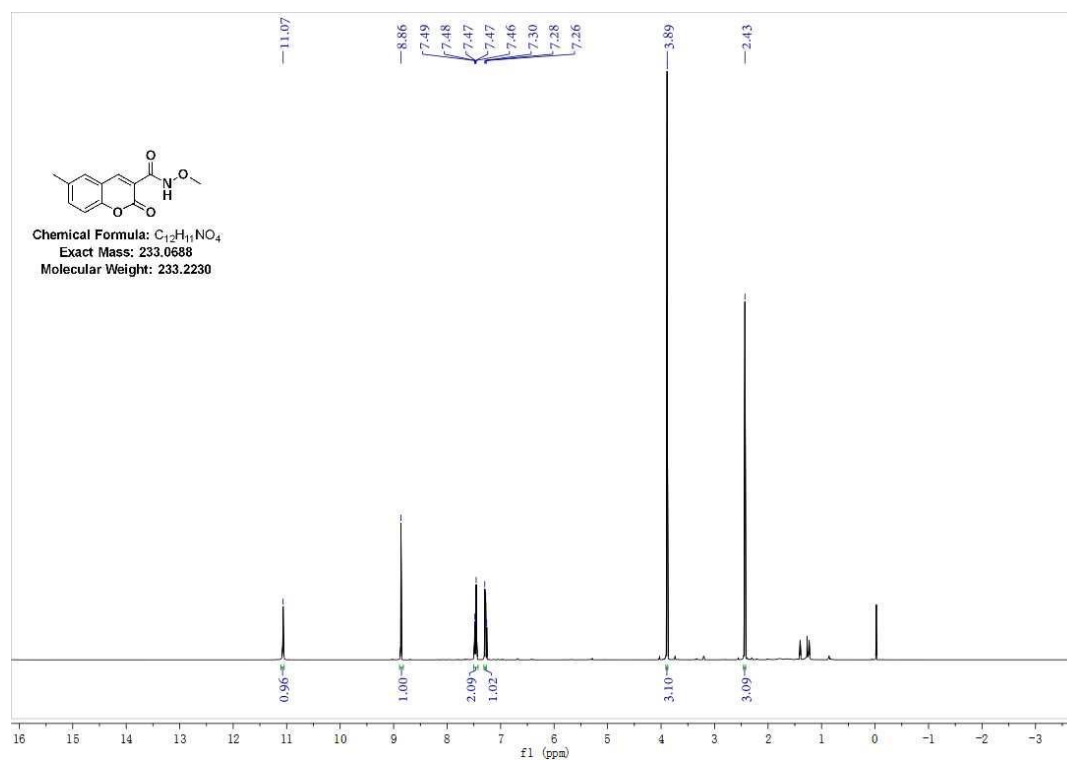

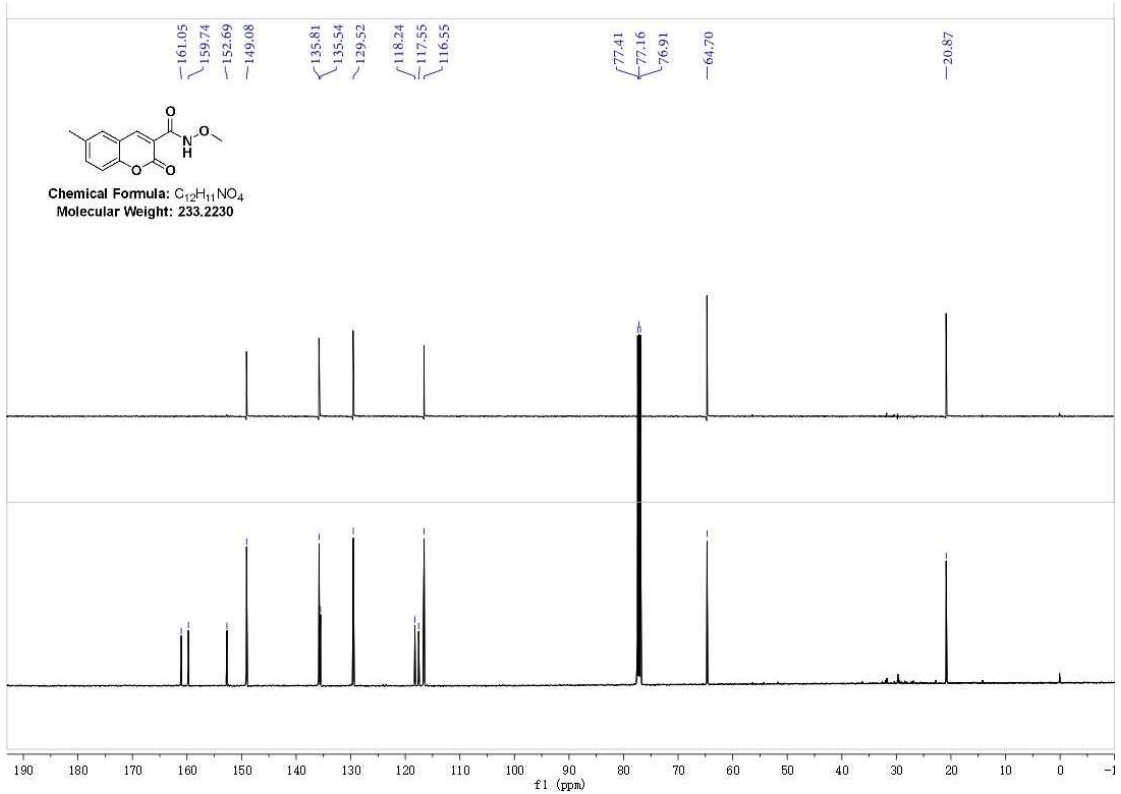

User Spectra

Fragmentor Voltage 170  
Collision Energy 0  
Ionization Mode ESI

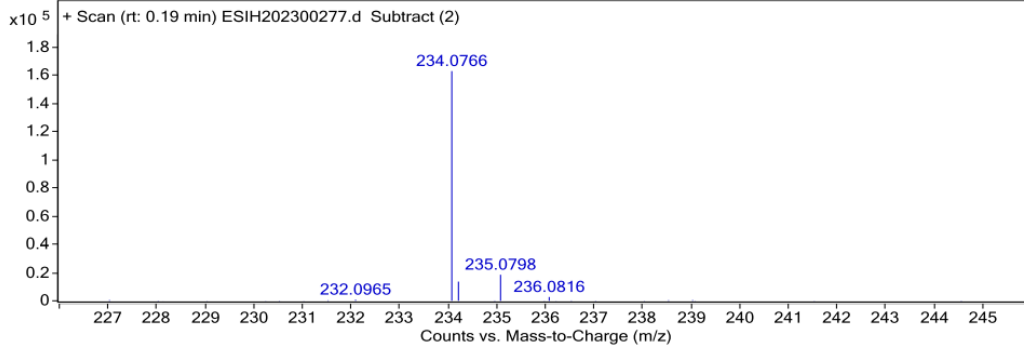

Formula Calculator Results

| m/z      | Calc m/z | Diff (mDa) | Diff (ppm) | Ion Formula  | Ion    |
|----------|----------|------------|------------|--------------|--------|
| 234.0766 | 234.0761 | -0.54      | -2.3       | C12 H12 N O4 | (M+H)+ |

*N*,6-dimethoxy-2-oxo-2H-chromene-3-carboxamide (**1c**)

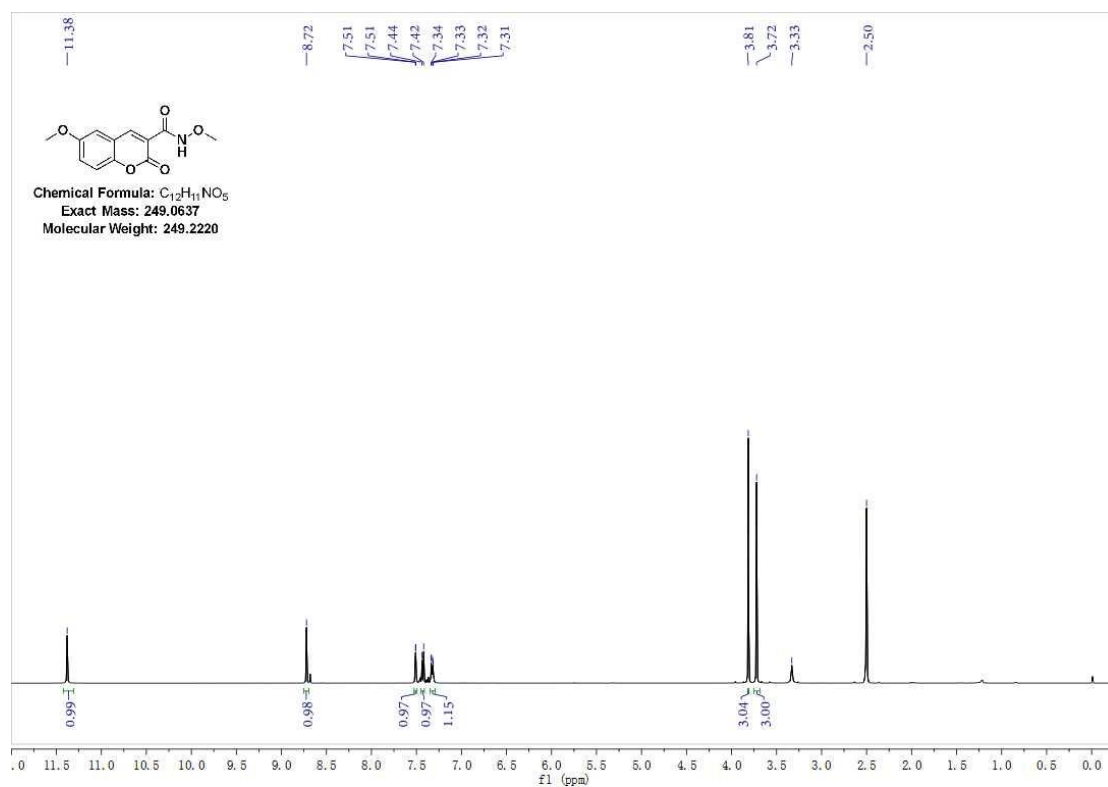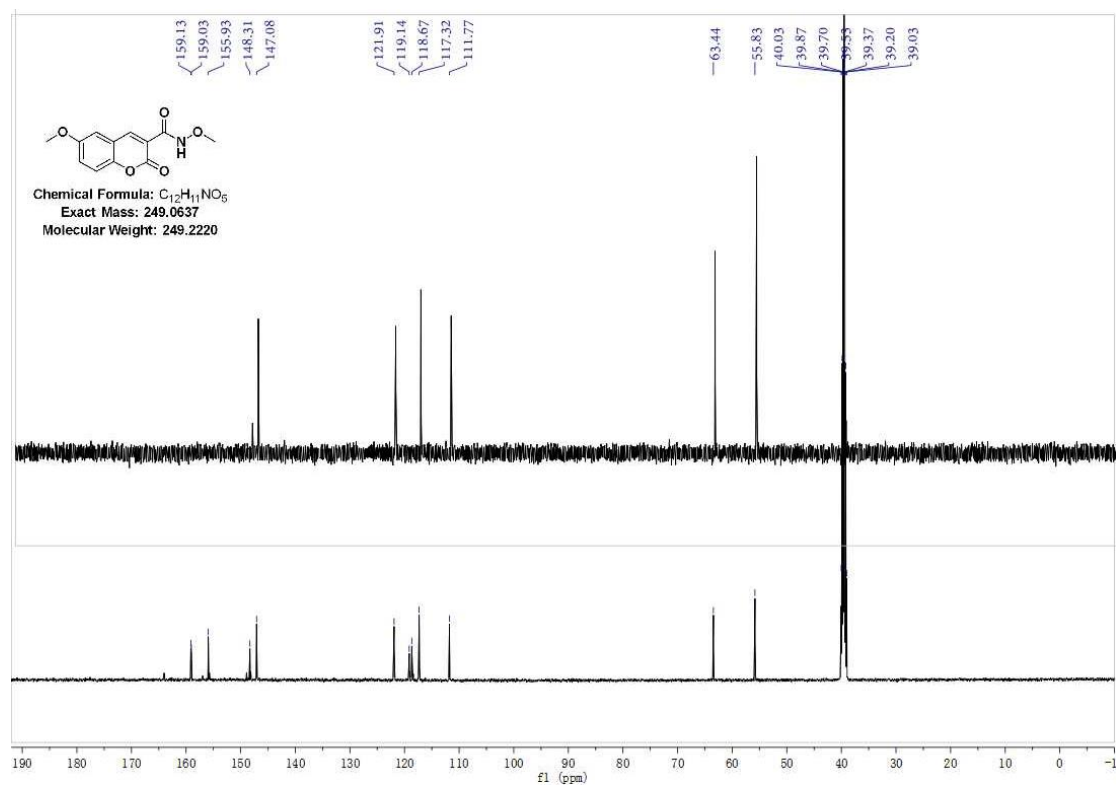

User Spectra

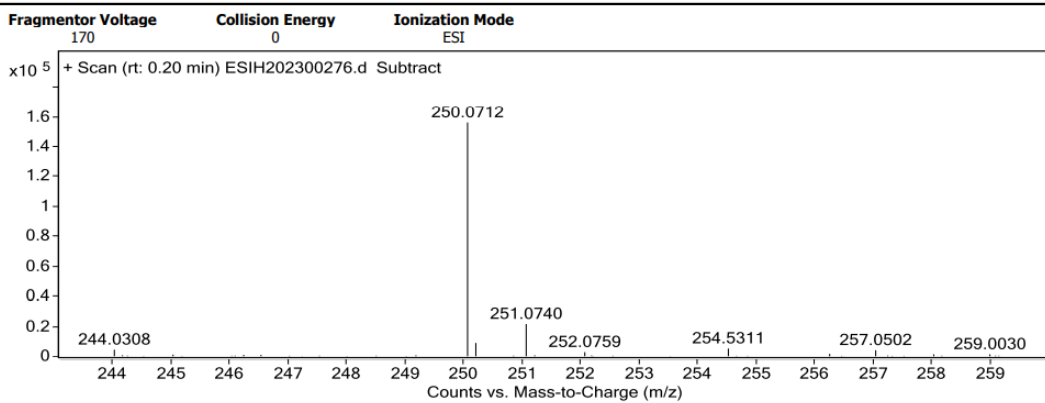

Formula Calculator Results

| m/z      | Calc m/z | Diff (mDa) | Diff (ppm) | Ion Formula  | Ion    |
|----------|----------|------------|------------|--------------|--------|
| 250.0712 | 250.071  | -0.18      | -0.73      | C12 H12 N O5 | (M+H)+ |

6-Fluoro-N-methoxy-2-oxo-2H-chromene-3-carboxamide (1d)

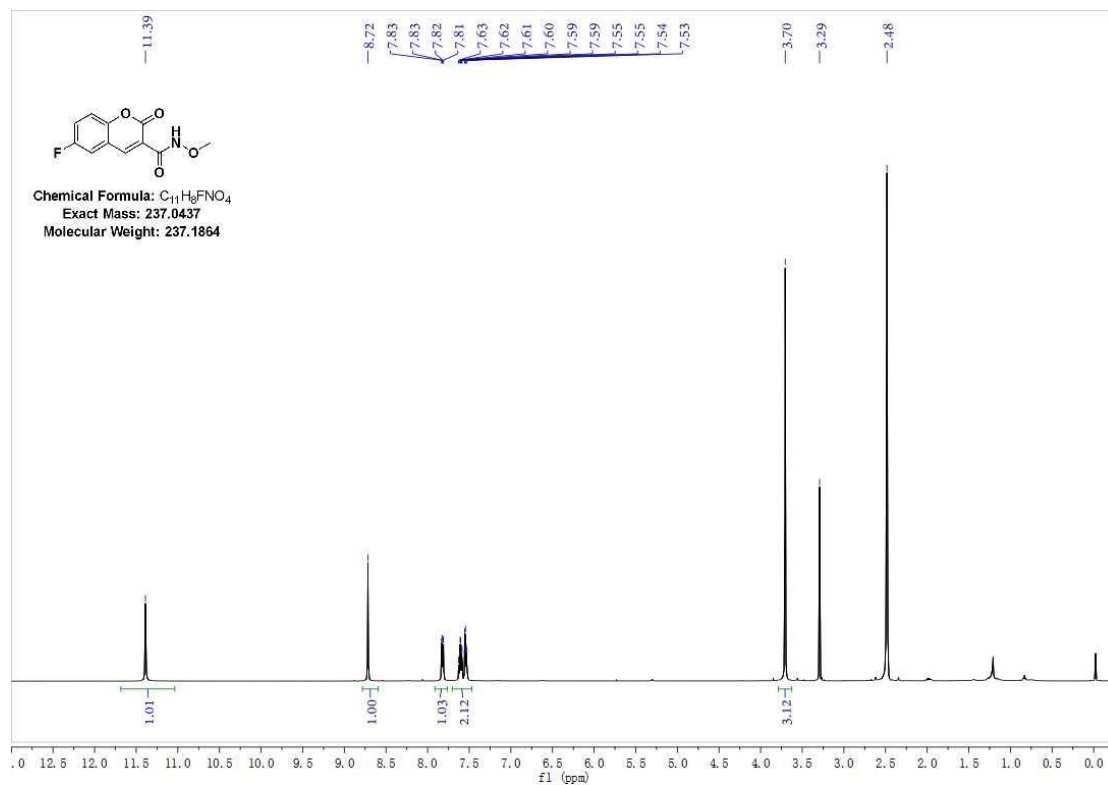



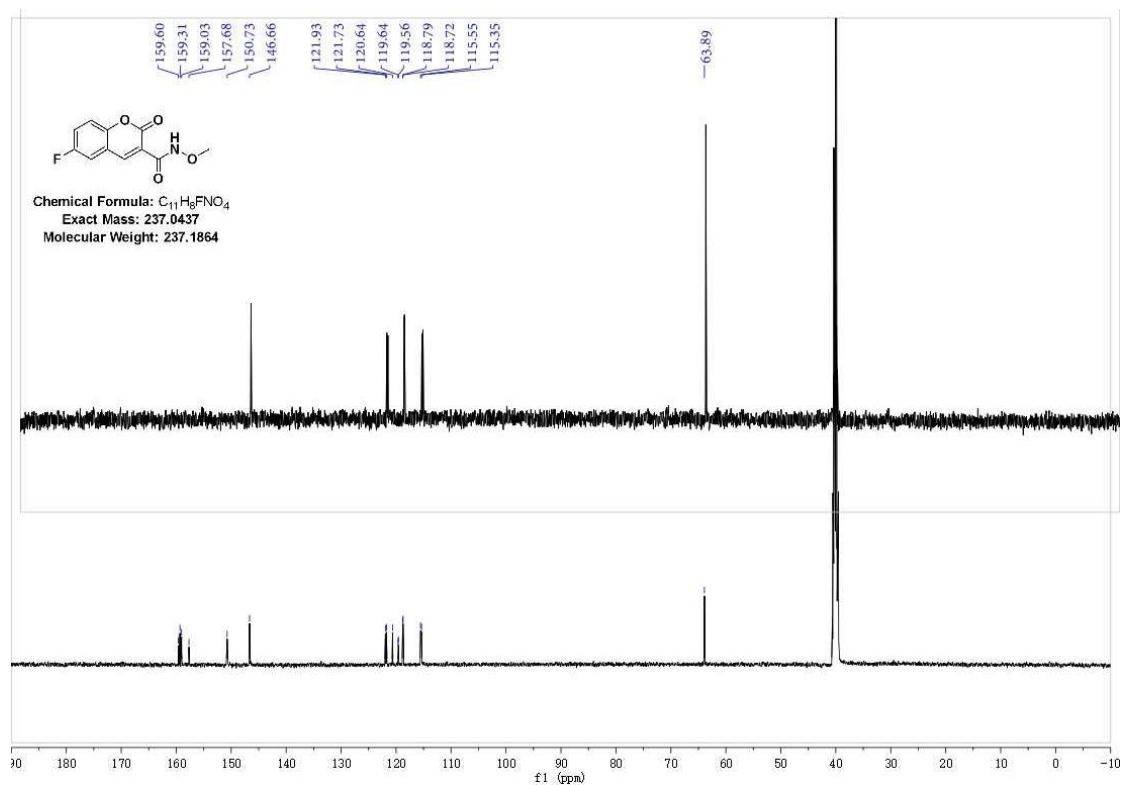

User Spectra

Fragmentor Voltage: 170  
 Collision Energy: 0  
 Ionization Mode: ESI

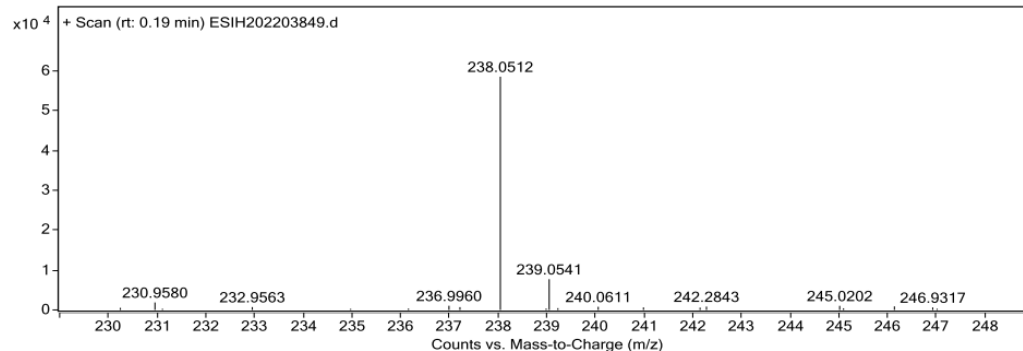

Formula Calculator Results

| m/z      | Calc m/z | Diff (mDa) | Diff (ppm) | Ion Formula                                                    | Ion                |
|----------|----------|------------|------------|----------------------------------------------------------------|--------------------|
| 238.0512 | 238.051  | -0.2       | -0.83      | C <sub>11</sub> H <sub>9</sub> F N <sub>2</sub> O <sub>4</sub> | (M+H) <sup>+</sup> |

6-Chloro-N-methoxy-2-oxo-2H-chromene-3-carboxamide (1e)

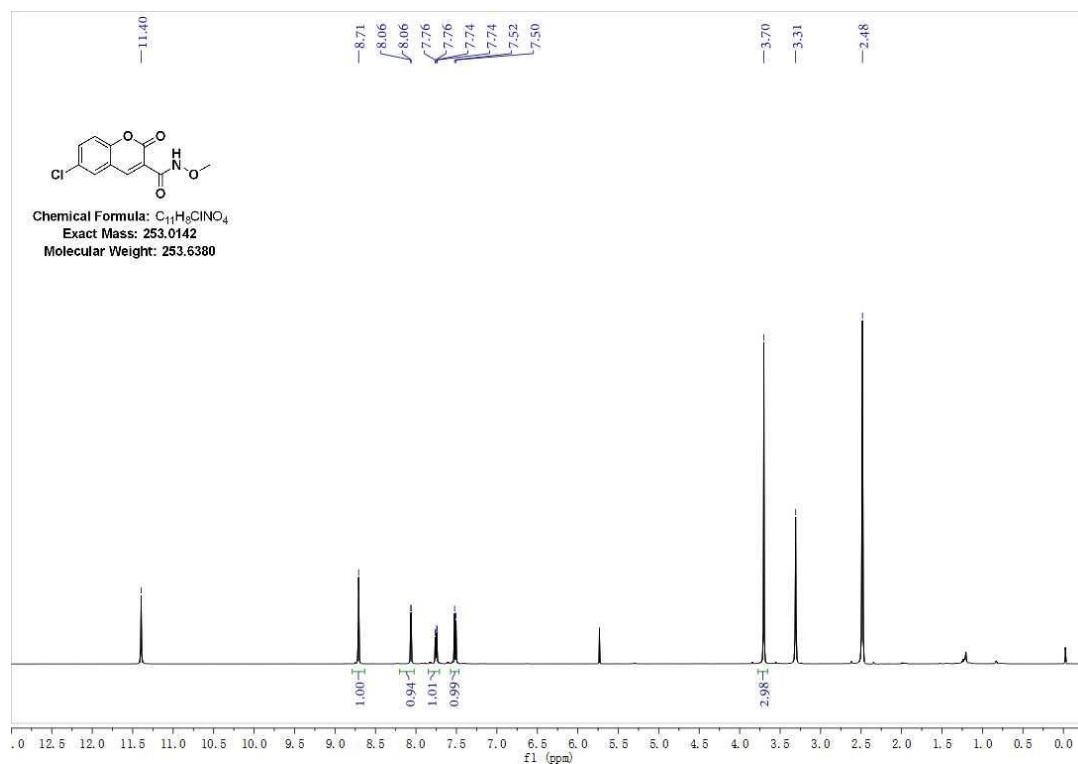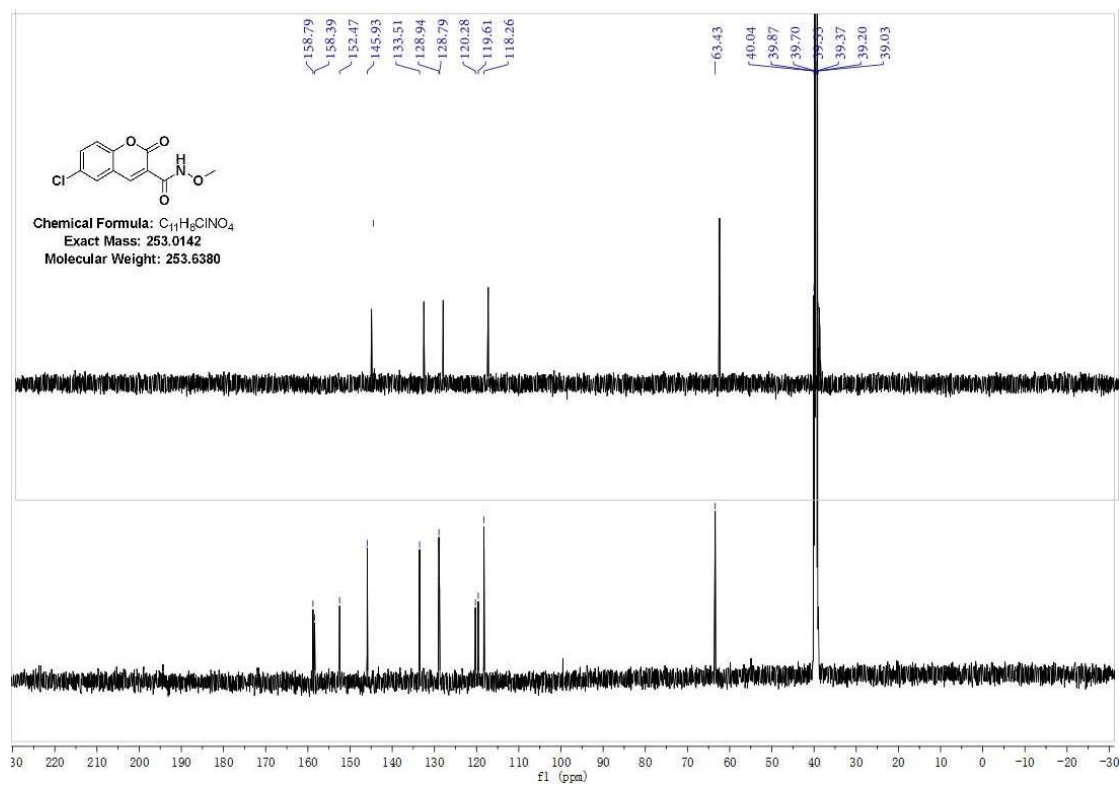

## User Spectra

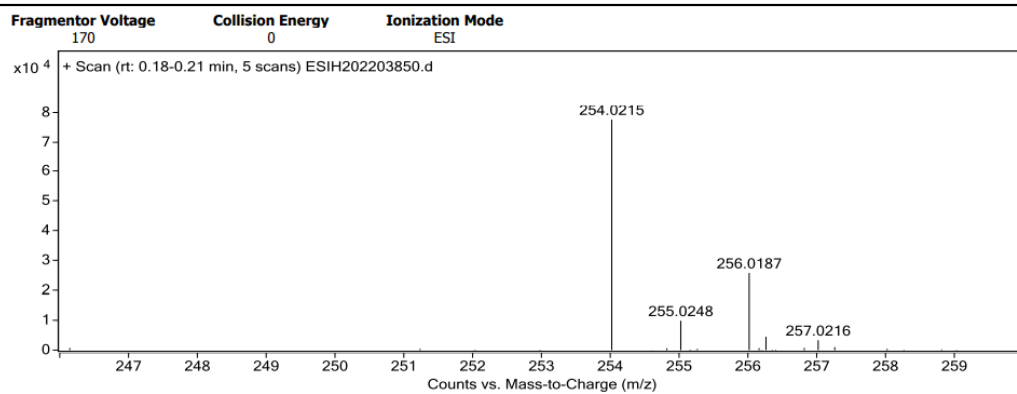

## Formula Calculator Results

| m/z      | Calc m/z | Diff (mDa) | Diff (ppm) | Ion Formula    | Ion                |
|----------|----------|------------|------------|----------------|--------------------|
| 254.0215 | 254.0215 | -0.08      | -0.3       | C11 H9 Cl N O4 | (M+H) <sup>+</sup> |

*N*-methoxy-2-oxo-6-(trifluoromethyl)-2*H*-chromene-3-carboxamide (**1f**)

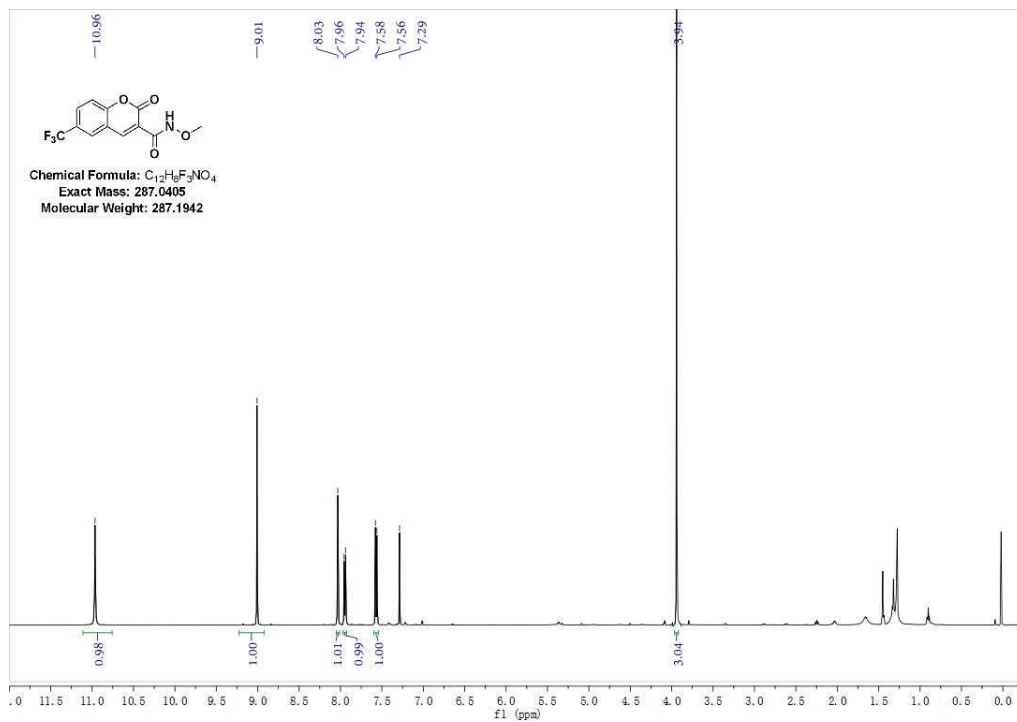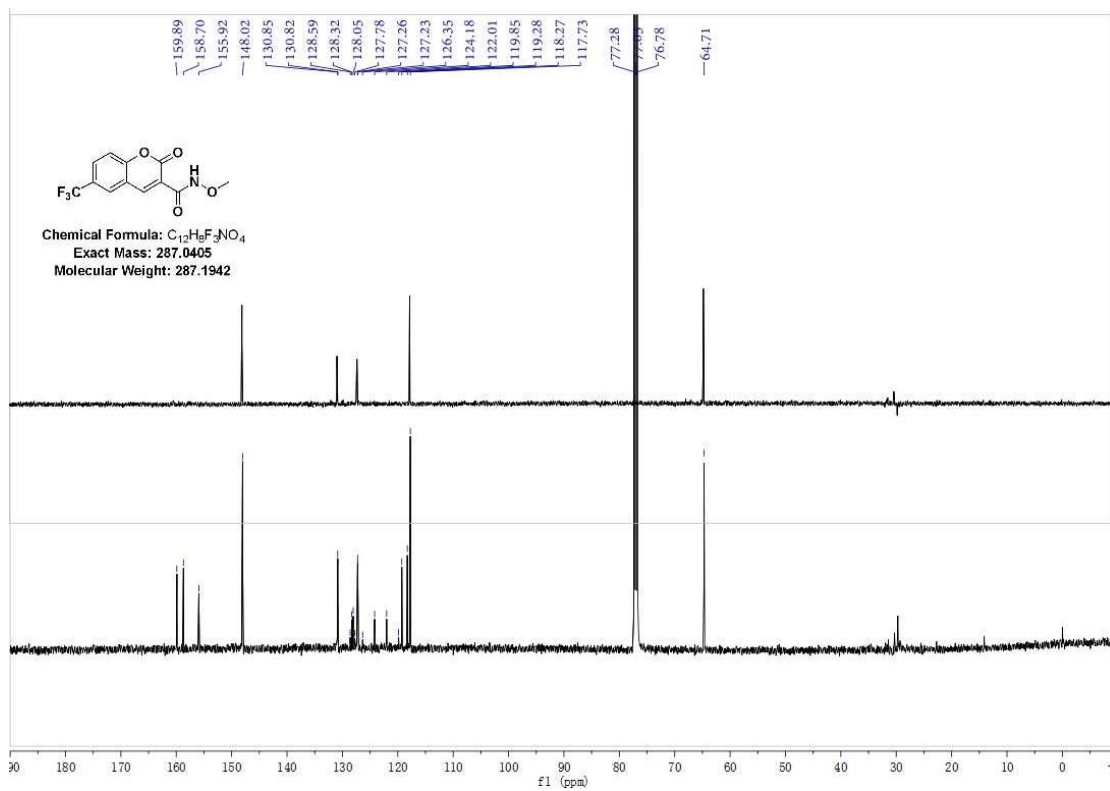

User Spectra

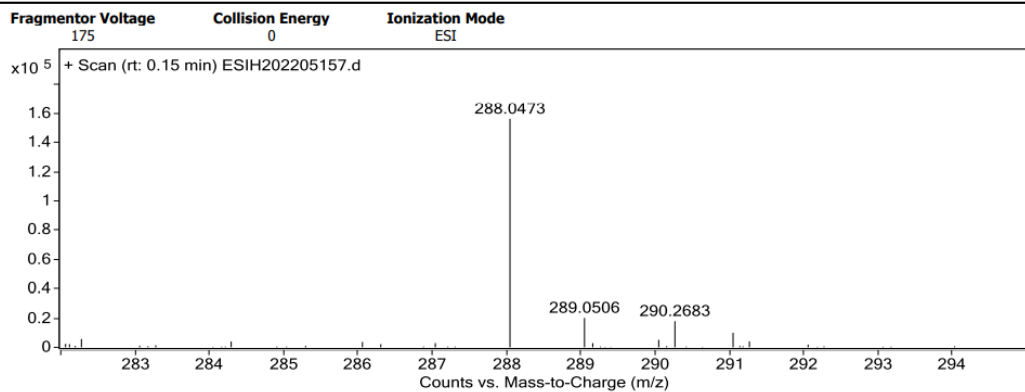

Formula Calculator Results

| m/z      | Calc m/z | Diff (mDa) | Diff (ppm) | Ion Formula    | Ion    |
|----------|----------|------------|------------|----------------|--------|
| 288.0473 | 288.0478 | 0.49       | 1.71       | C12 H9 F3 N O4 | (M+H)+ |

*N*-methoxy-7-methyl-2-oxo-2H-chromene-3-carboxamide (**1g**)

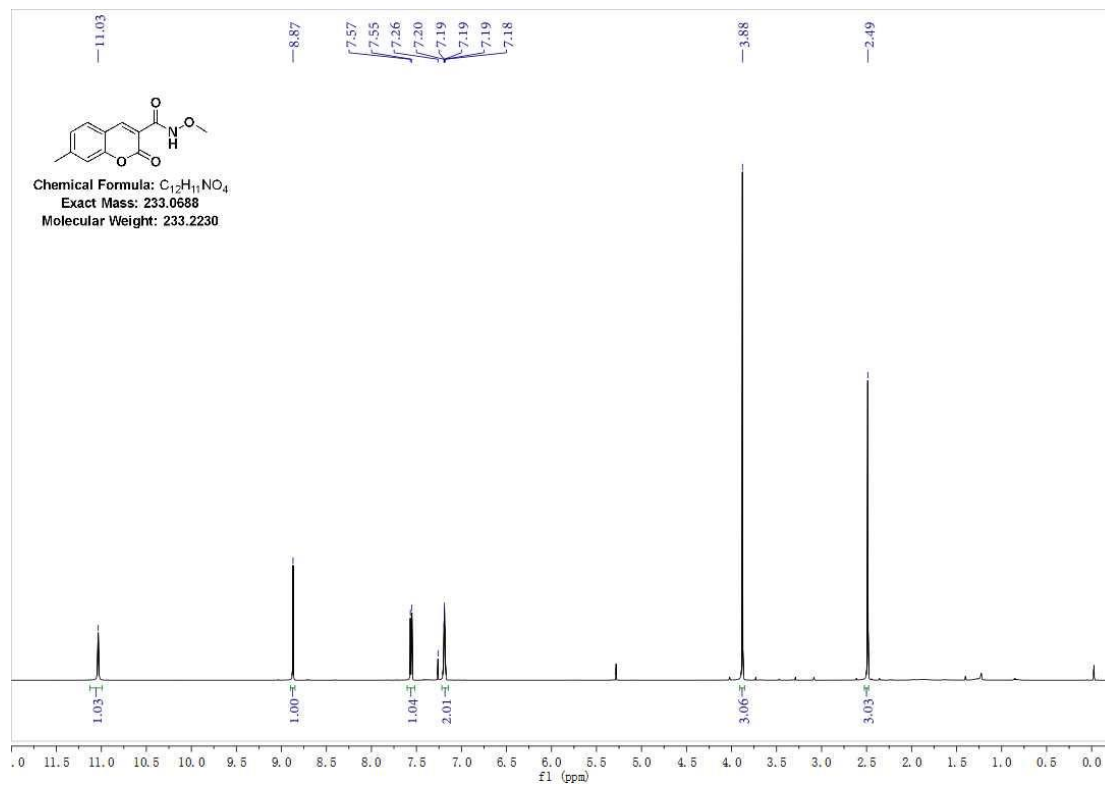

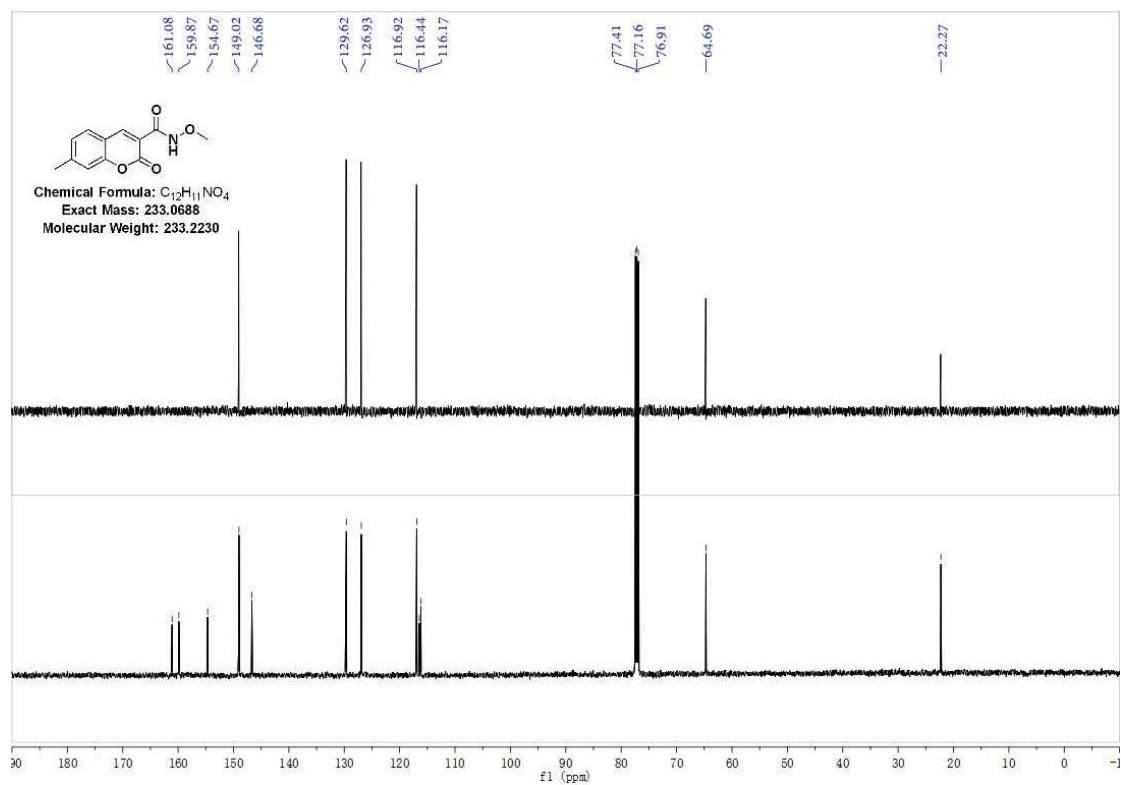

#### User Spectra

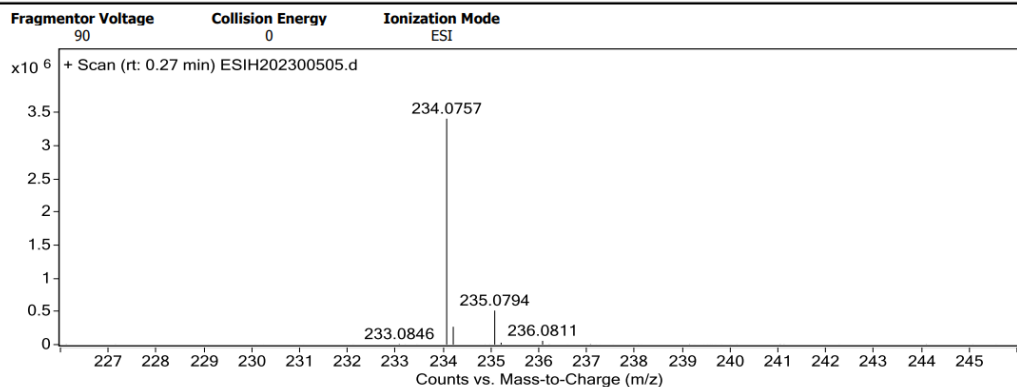

#### Formula Calculator Results

| m/z      | Calc m/z | Diff (mDa) | Diff (ppm) | Ion Formula  | Ion                |
|----------|----------|------------|------------|--------------|--------------------|
| 234.0757 | 234.0761 | 0.4        | 1.71       | C12 H12 N O4 | (M+H) <sup>+</sup> |

*9,10,15-Triphenyl-6H,7H-chromeno[4',3':4,5]pyrido[2,1-a]isoquinoline-6,7-dione*  
**(3aa)**



User Spectra

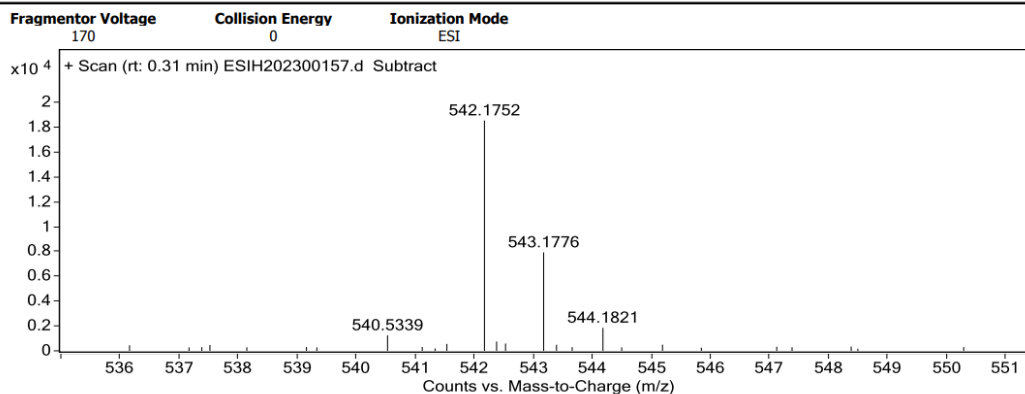

Formula Calculator Results

| m/z      | Calc m/z | Diff (mDa) | Diff (ppm) | Ion Formula  | Ion    |
|----------|----------|------------|------------|--------------|--------|
| 542.1752 | 542.1751 | -0.15      | -0.27      | C38 H24 N O3 | (M+H)+ |

--- End Of Report ---

*12-Methyl-9,10,15-tri-p-tolyl-6H,7H-chromeno[4',3':4,5]pyrido[2,1-a]isoquinoline-6,7-dione (3ab)*

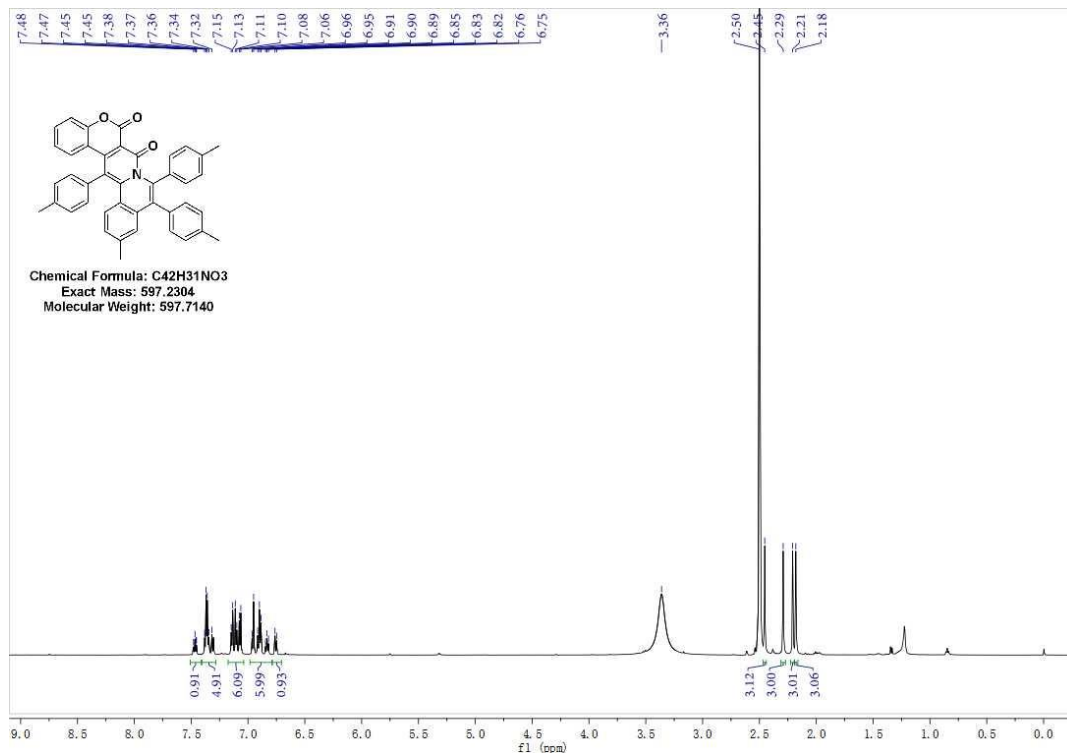



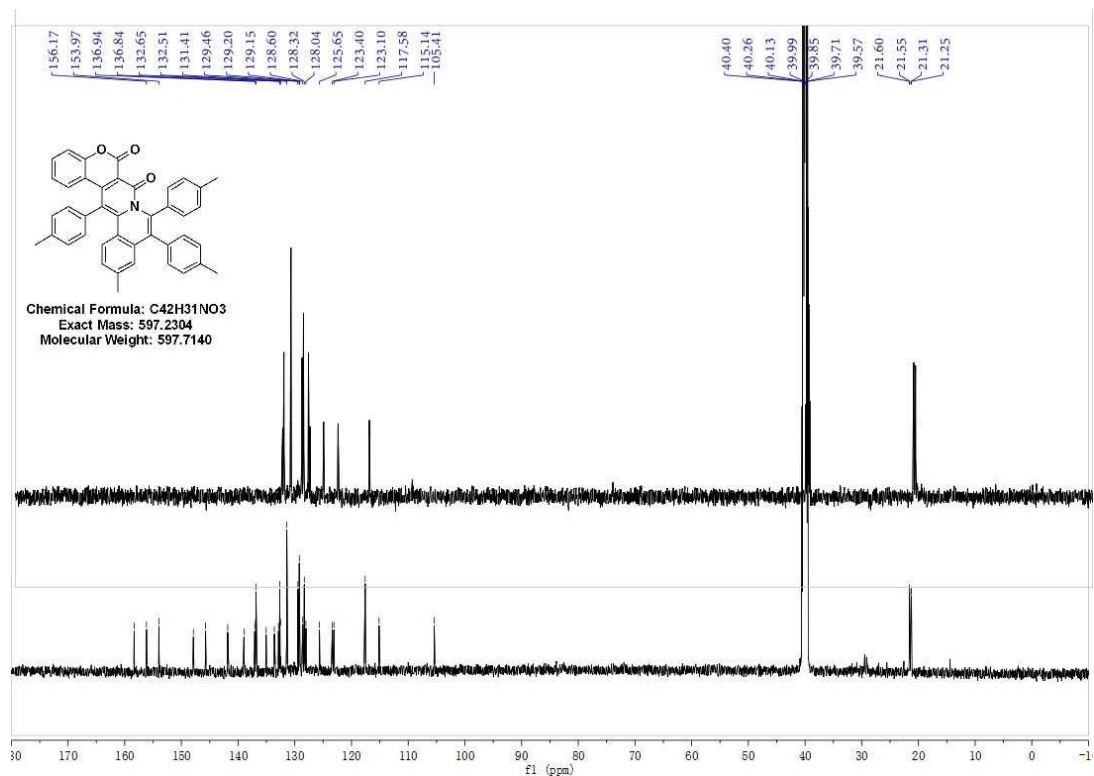

#### User Spectra

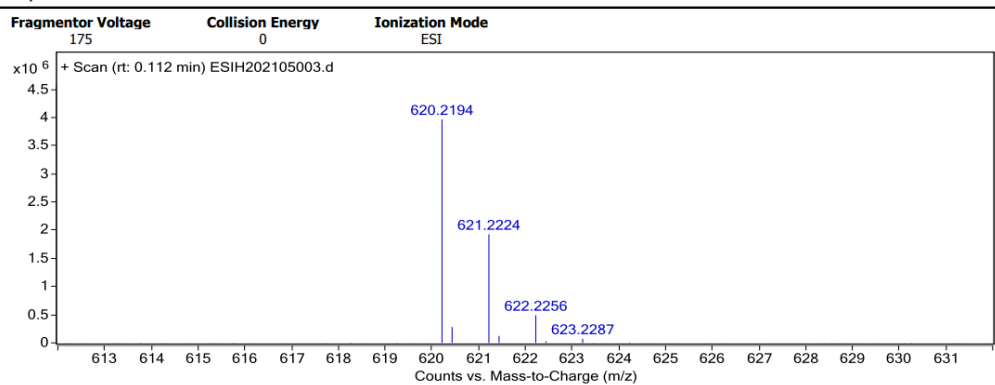

#### Formula Calculator Results

| m/z      | Calc m/z | Diff (mDa) | Diff (ppm) | Ion Formula                                         | Ion                 |
|----------|----------|------------|------------|-----------------------------------------------------|---------------------|
| 620.2194 | 620.2196 | 0.26       | 0.42       | C <sub>42</sub> H <sub>31</sub> N Na O <sub>3</sub> | (M+Na) <sup>+</sup> |

*12-(tert-Butyl)-9,10,15-tris(4-(tert-butyl)phenyl)-6H,7H-chromeno[4',3':4,5]pyrido[2,1-a]isoquinoline-6,7-dione (3ac)*

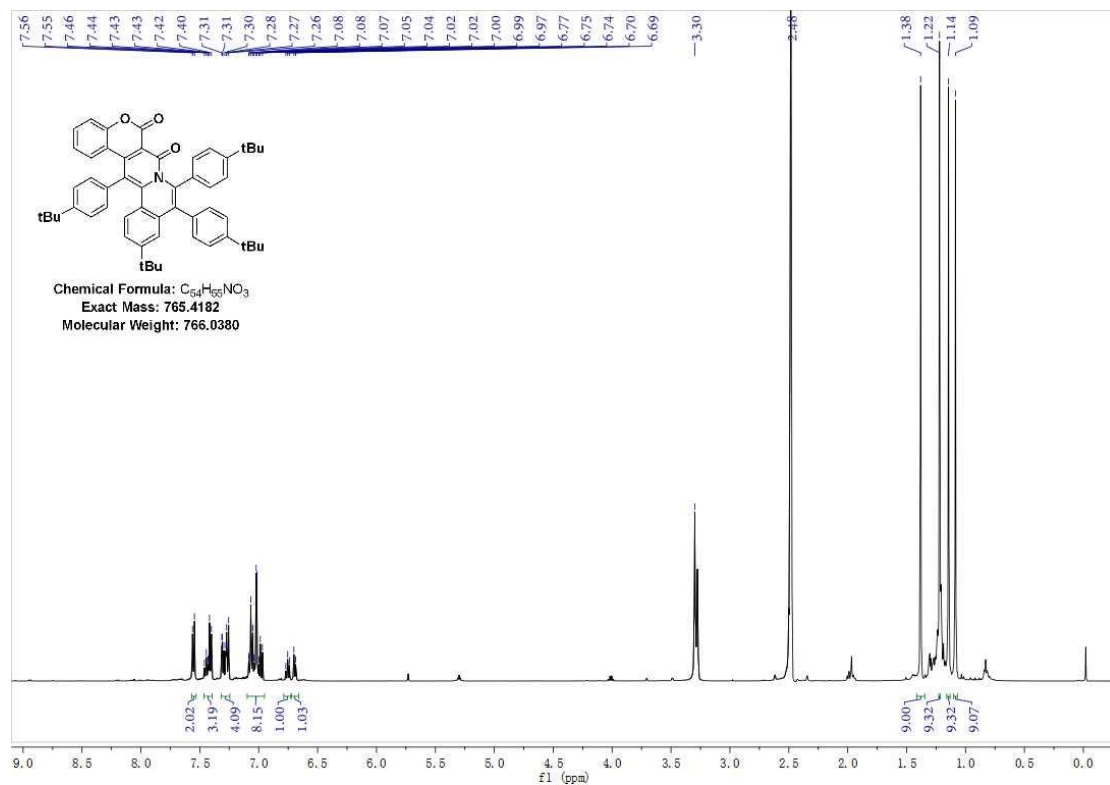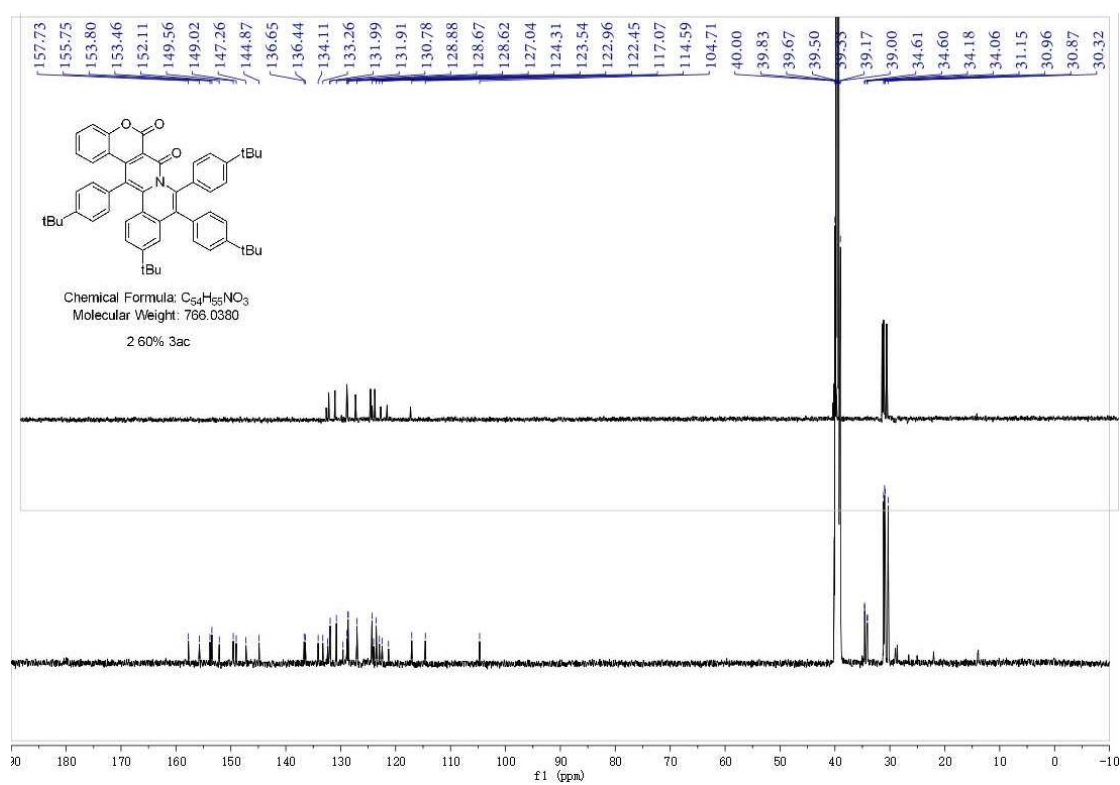

User Spectra

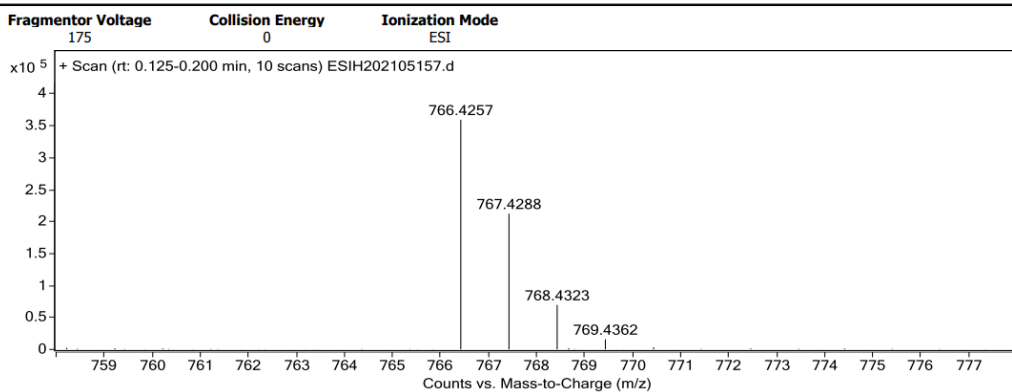

Formula Calculator Results

| m/z      | Calc m/z | Diff (mDa) | Diff (ppm) | Ion Formula  | Ion                |
|----------|----------|------------|------------|--------------|--------------------|
| 766.4257 | 766.4255 | -0.18      | -0.24      | C54 H56 N O3 | (M+H) <sup>+</sup> |

*12-Fluoro-9,10,15-tris(4-fluorophenyl)-6H,7H-chromeno[4',3':4,5]pyrido[2,1-a]isoquinoline-6,7-dione (3ad)*

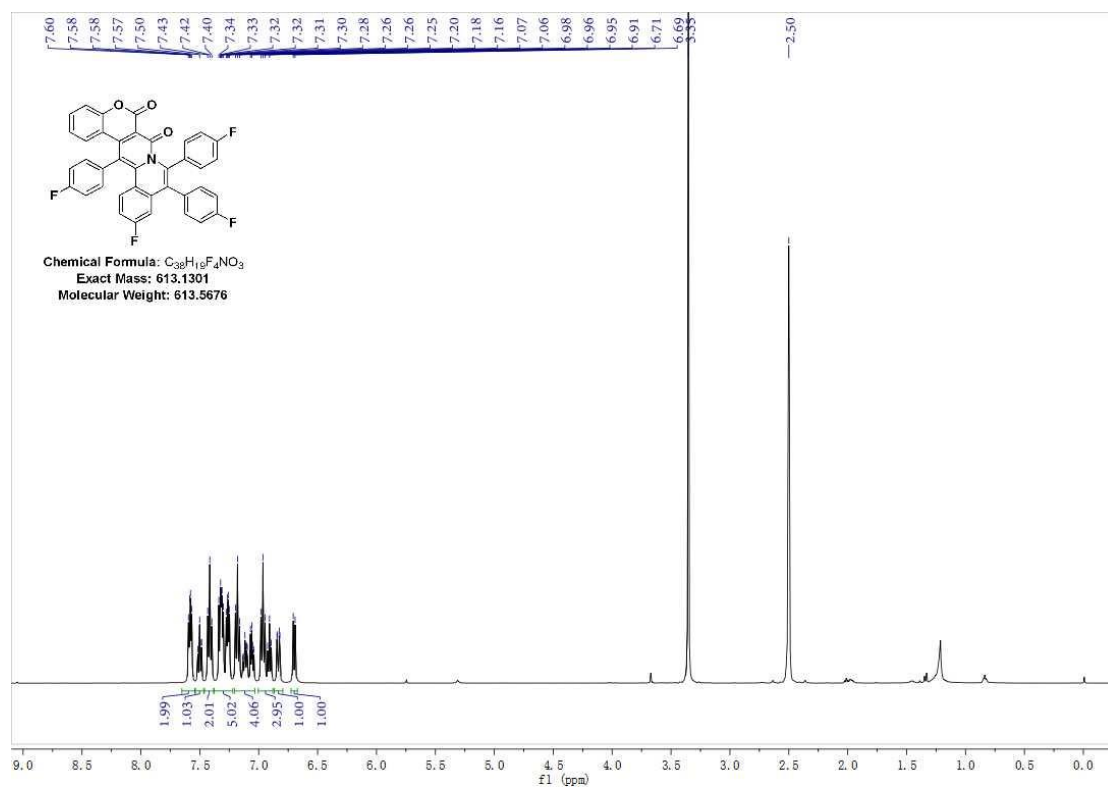

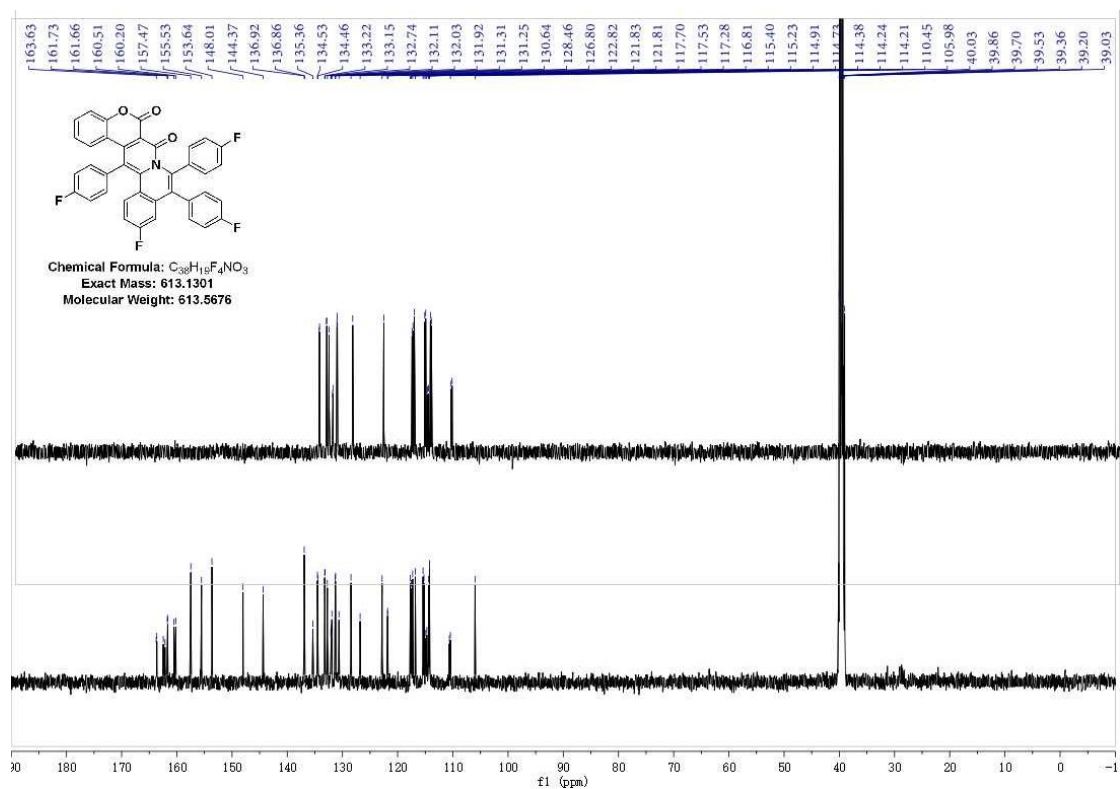

#### User Spectra

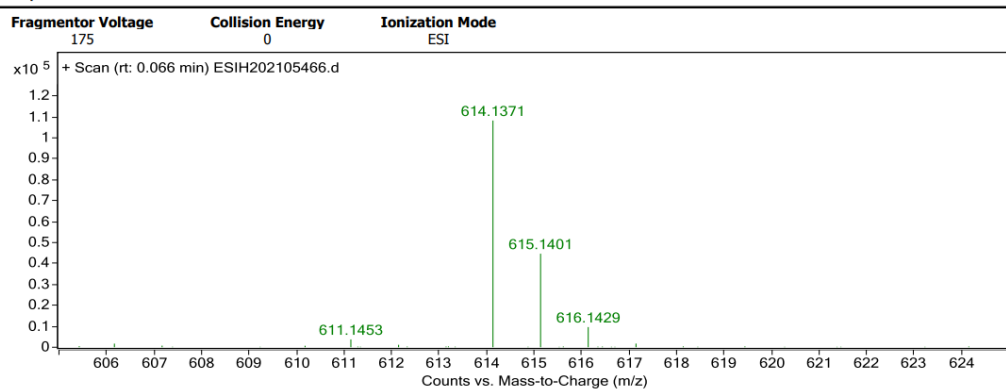

#### Formula Calculator Results

| m/z      | Calc m/z | Diff (mDa) | Diff (ppm) | Ion Formula                                                                  | Ion                |
|----------|----------|------------|------------|------------------------------------------------------------------------------|--------------------|
| 614.1371 | 614.1374 | 0.27       | 0.44       | C <sub>38</sub> H <sub>20</sub> F <sub>4</sub> N <sub>3</sub> O <sub>3</sub> | (M+H) <sup>+</sup> |

*12-Chloro-9,10,15-tris(4-chlorophenyl)-6H,7H-chromeno[4',3':4,5]pyrido[2,1-a]isoquinoline-6,7-dione (3ae)*

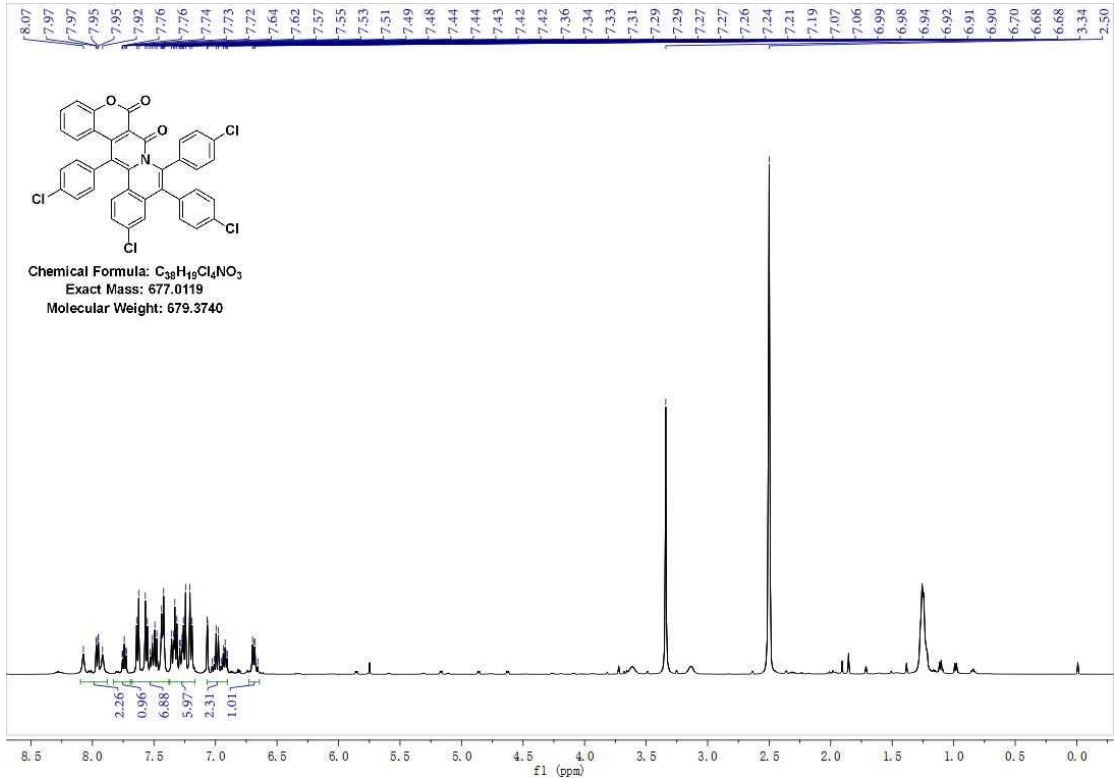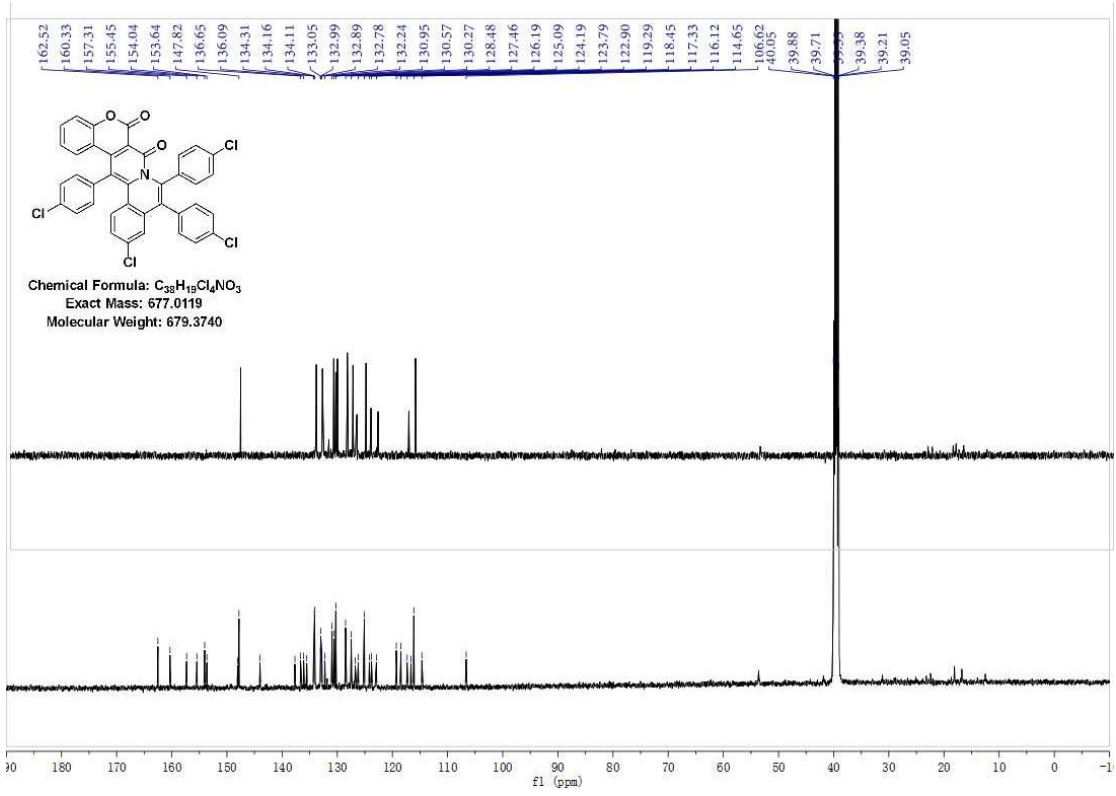

User Spectra

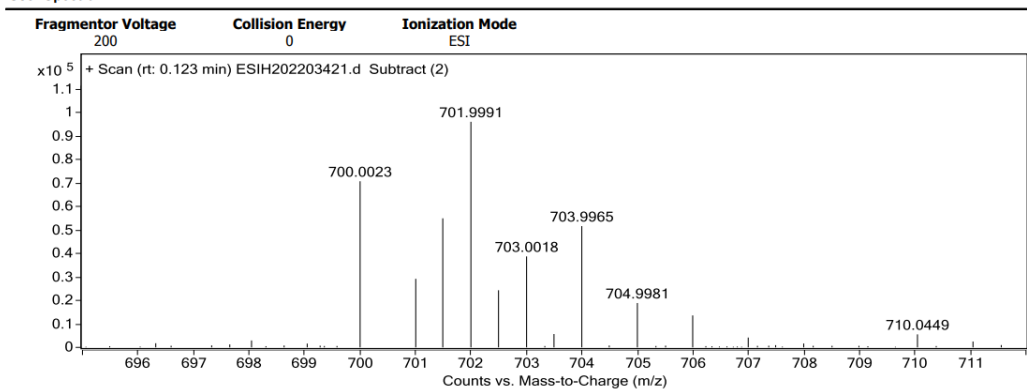

Formula Calculator Results

| m/z      | Calc m/z | Diff (mDa) | Diff (ppm) | Ion Formula         | Ion     |
|----------|----------|------------|------------|---------------------|---------|
| 700.0023 | 700.0011 | -1.16      | -1.66      | C38 H19 Cl4 N Na O3 | (M+Na)+ |

*12-Bromo-9,10,15-tris(4-bromophenyl)-6H,7H-chromeno[4',3':4,5]pyrido[2,1-a]isoquinoline-6,7-dione (3af)*

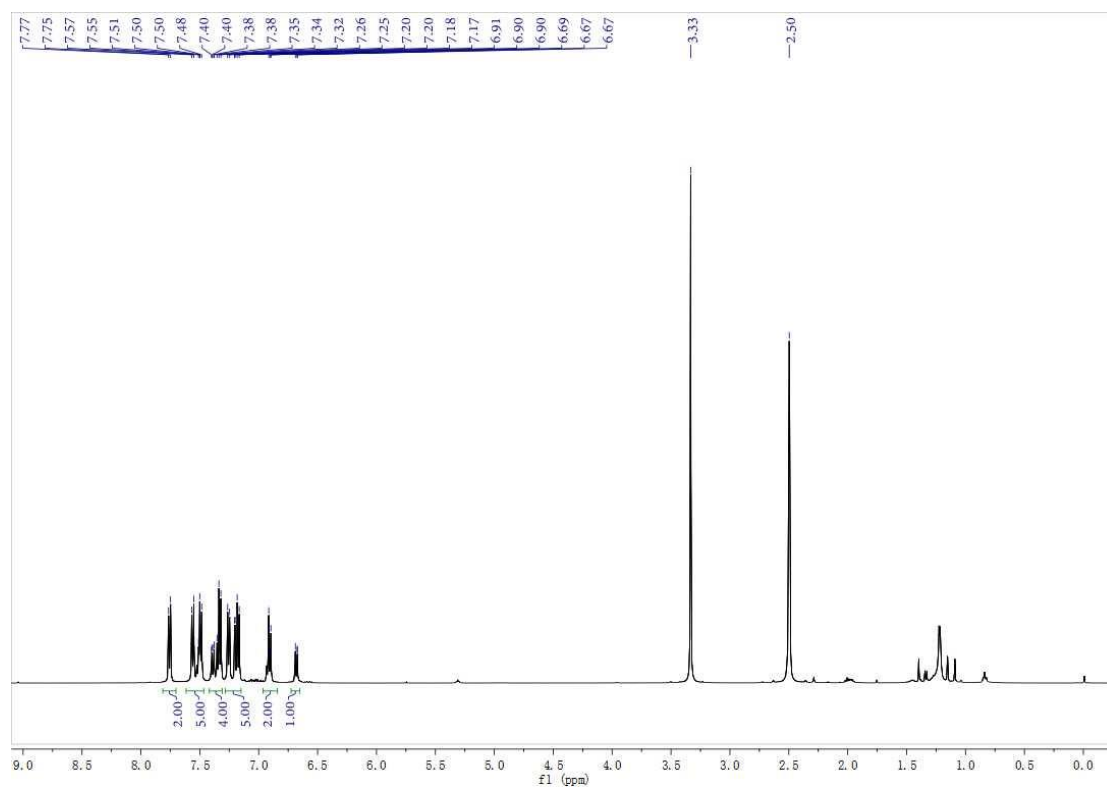

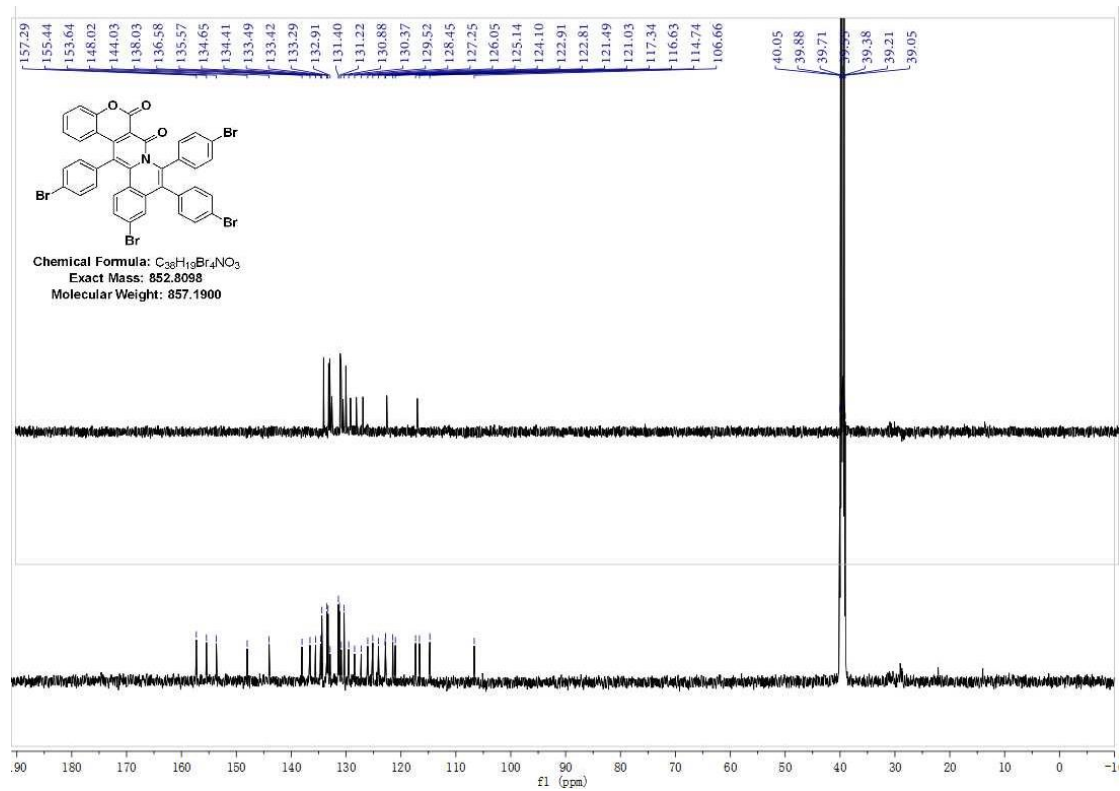

User Spectra

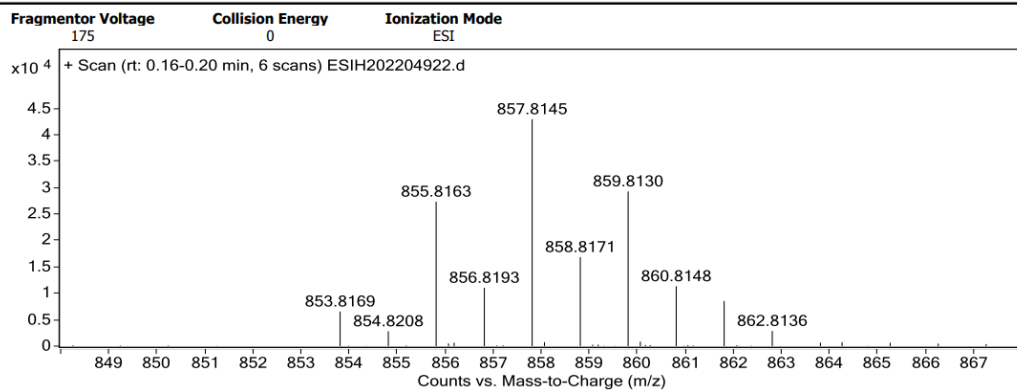

Formula Calculator Results

| m/z      | Calc m/z | Diff (mDa) | Diff (ppm) | Ion Formula      | Ion    |
|----------|----------|------------|------------|------------------|--------|
| 853.8169 | 853.8171 | 0.24       | 0.29       | C38 H20 Br4 N O3 | (M+H)+ |

12-(Trifluoromethyl)-9,10,15-tris(4-(trifluoromethyl)phenyl)-6H,7H-chromeno[4',3':4,5]pyrido[2,1-a]isoquinoline-6,7-dione (**3ag**)

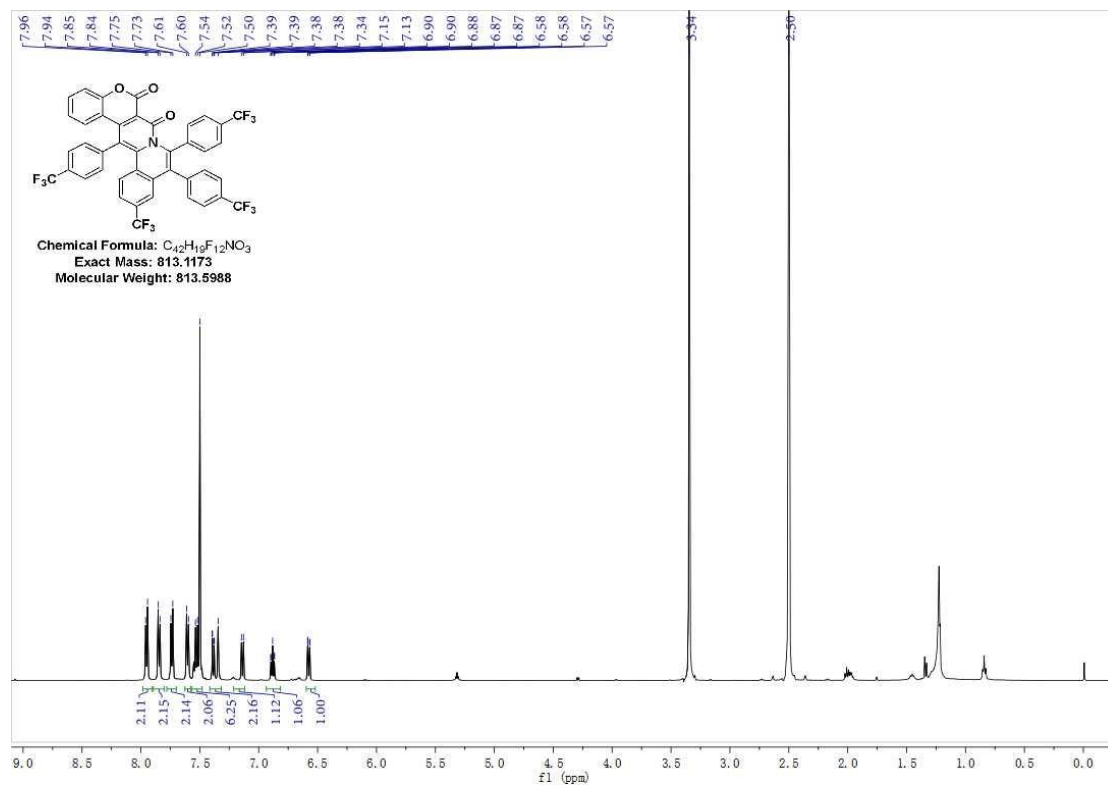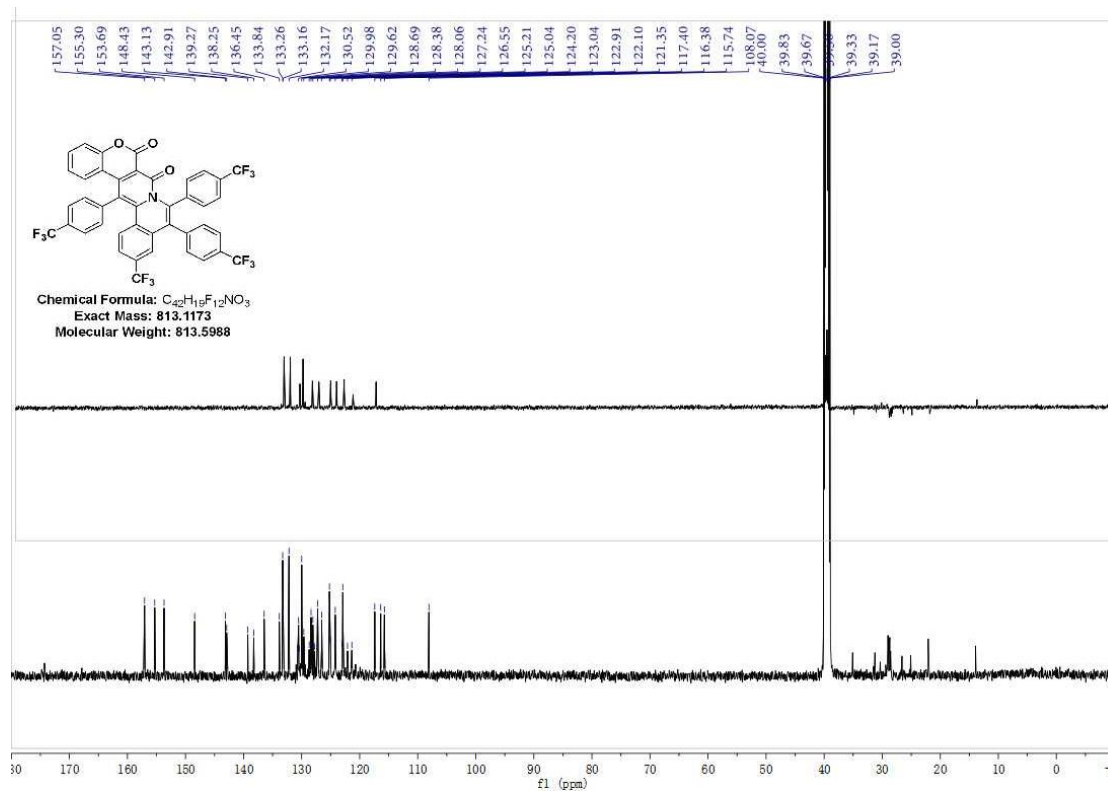



User Spectra

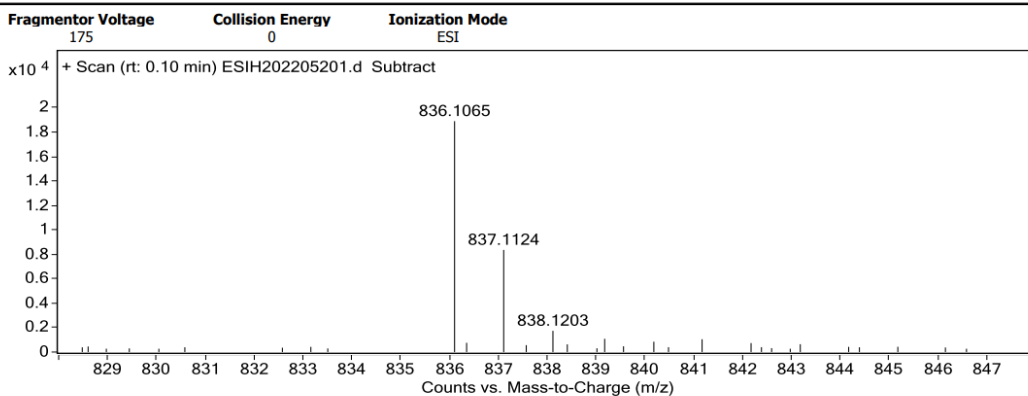

Formula Calculator Results

| m/z      | Calc m/z | Diff (mDa) | Diff (ppm) | Ion Formula                                                         | Ion                 |
|----------|----------|------------|------------|---------------------------------------------------------------------|---------------------|
| 836.1065 | 836.1066 | 0.1        | 0.12       | C <sub>42</sub> H <sub>19</sub> F <sub>12</sub> N Na O <sub>3</sub> | (M+Na) <sup>+</sup> |

*2-Methyl-9,10,15-triphenyl-6H,7H-chromeno[4',3':4,5]pyrido[2,1-a]isoquinoline-6,7-dione (3ba)*

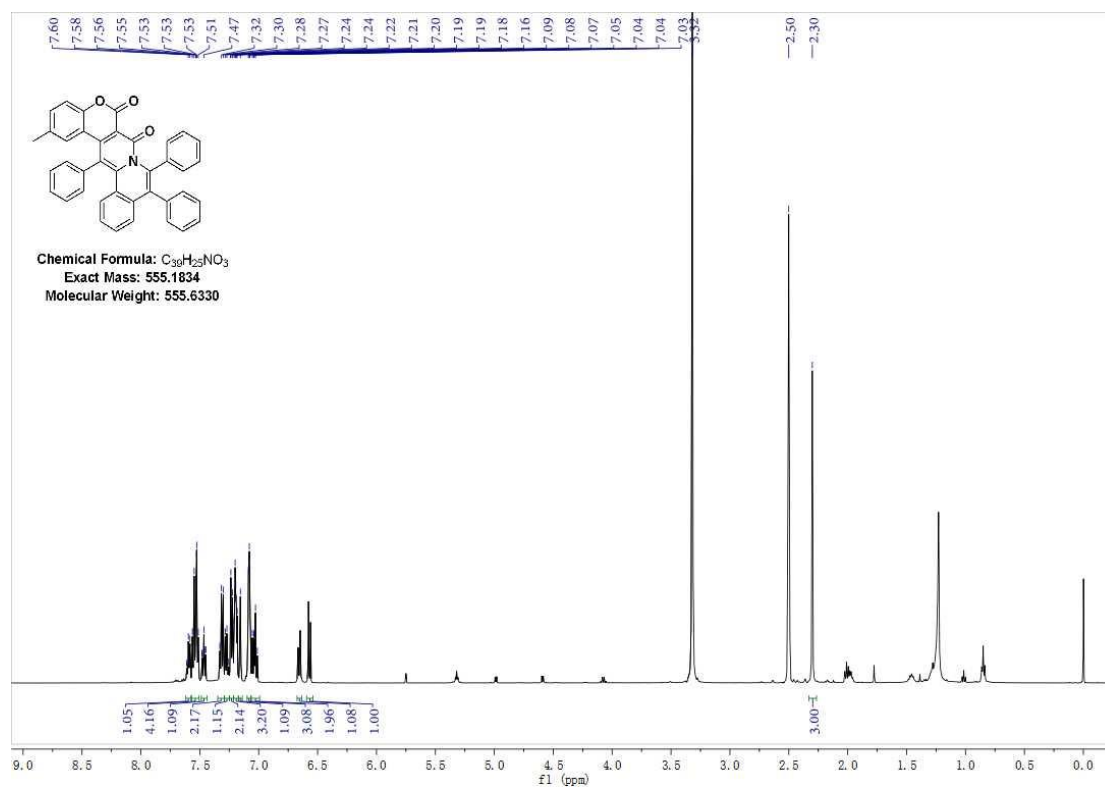

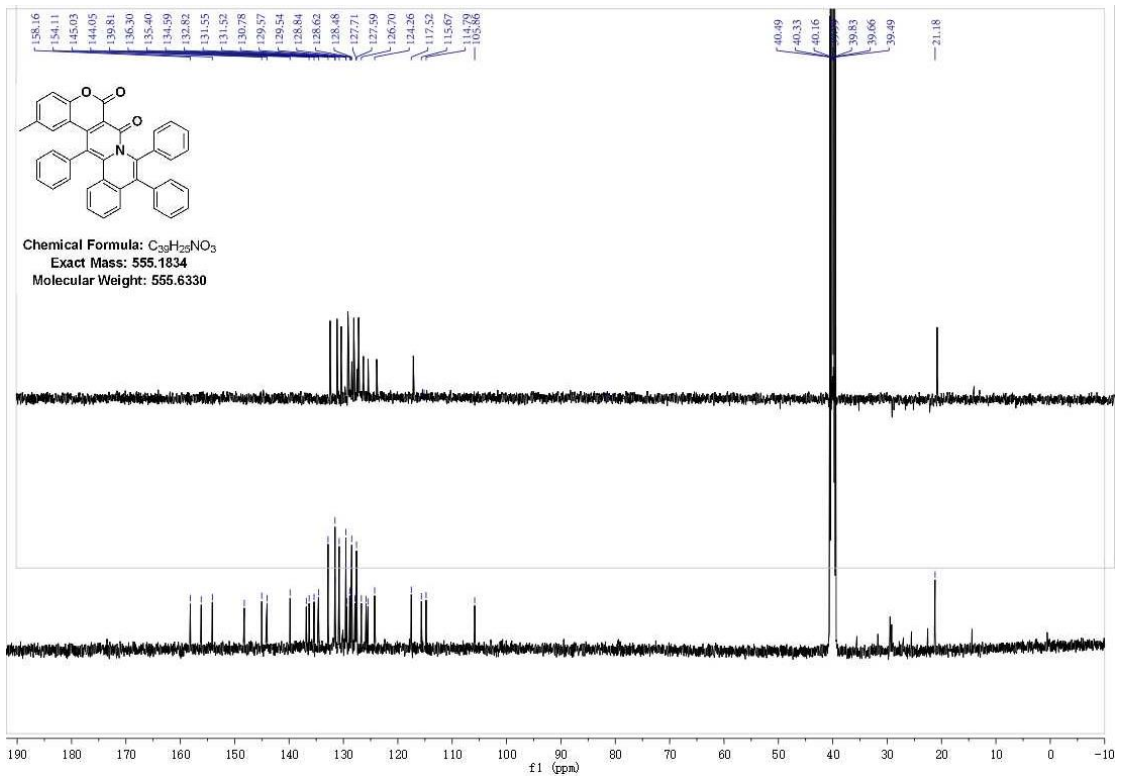

**User Spectra**

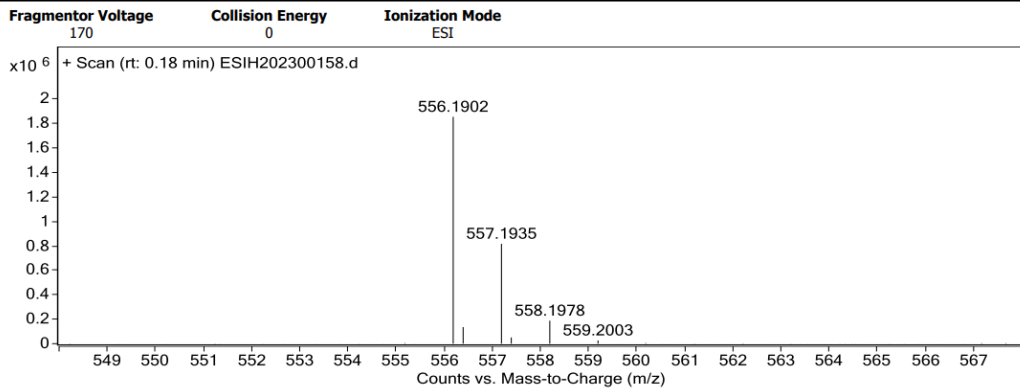

**Formula Calculator Results**

| m/z      | Calc m/z | Diff (mDa) | Diff (ppm) | Ion Formula                                      | Ion                |
|----------|----------|------------|------------|--------------------------------------------------|--------------------|
| 556.1902 | 556.1907 | 0.54       | 0.97       | C <sub>39</sub> H <sub>26</sub> N O <sub>3</sub> | (M+H) <sup>+</sup> |

12-Fluoro-9,10,15-tris(4-fluorophenyl)-2-methyl-6H,7H-chromeno[4',3':4,5]pyrido[2,1-a]isoquinoline-6,7-dione (**3bd**)

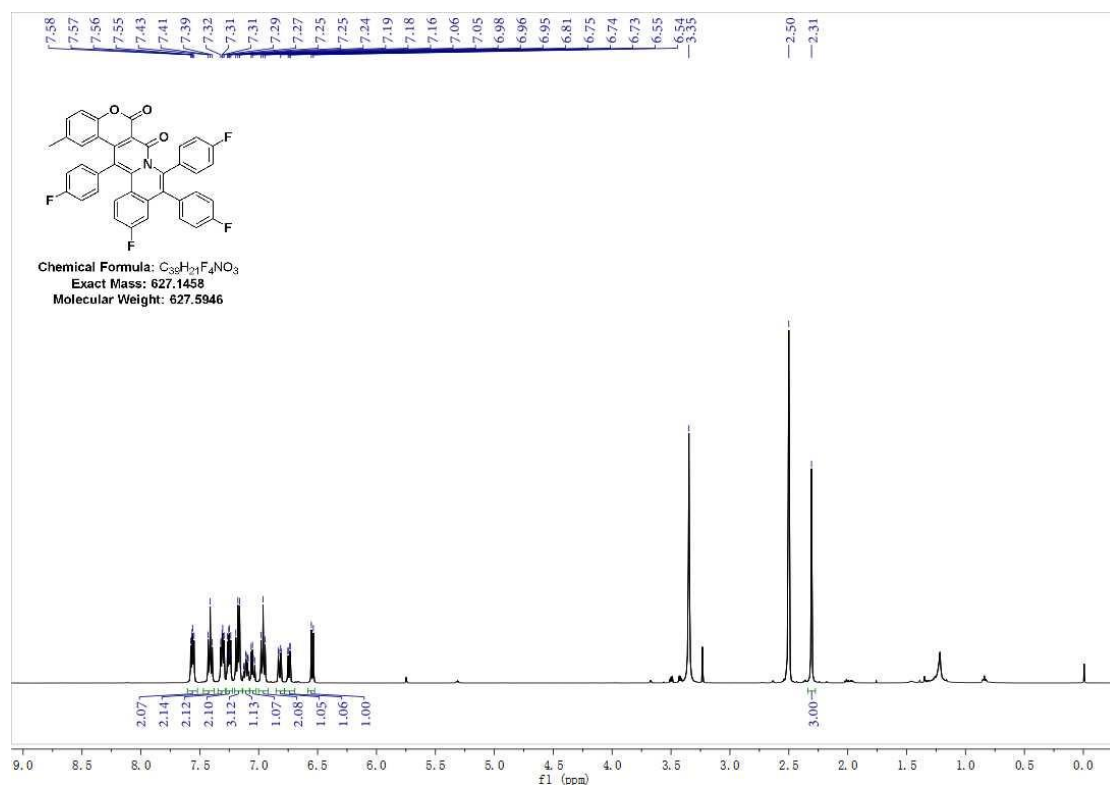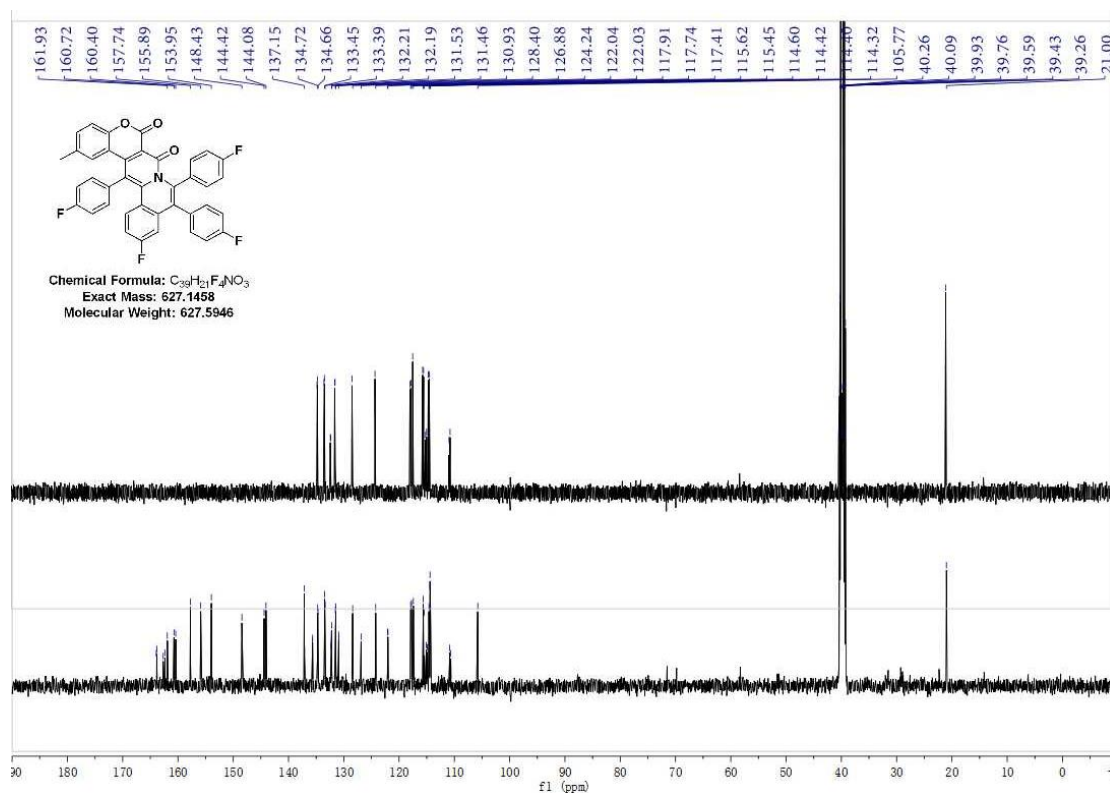

User Spectra

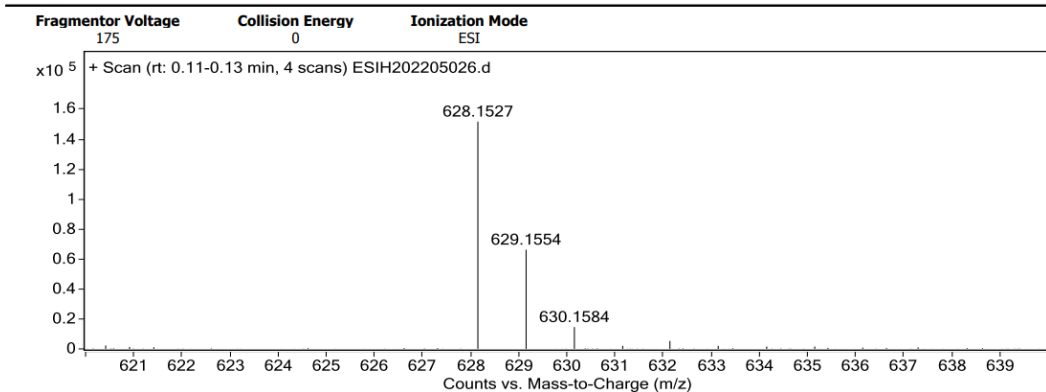

Formula Calculator Results

| m/z      | Calc m/z | Diff (mDa) | Diff (ppm) | Ion Formula                                                     | Ion                |
|----------|----------|------------|------------|-----------------------------------------------------------------|--------------------|
| 628.1527 | 628.153  | 0.34       | 0.54       | C <sub>39</sub> H <sub>22</sub> F <sub>4</sub> N O <sub>3</sub> | (M+H) <sup>+</sup> |

12-Bromo-9,10,15-tris(4-bromophenyl)-2-methyl-6H,7H-chromeno[4',3':4,5]pyrido[2,1-a]isoquinoline-6,7-dione (**3bf**)

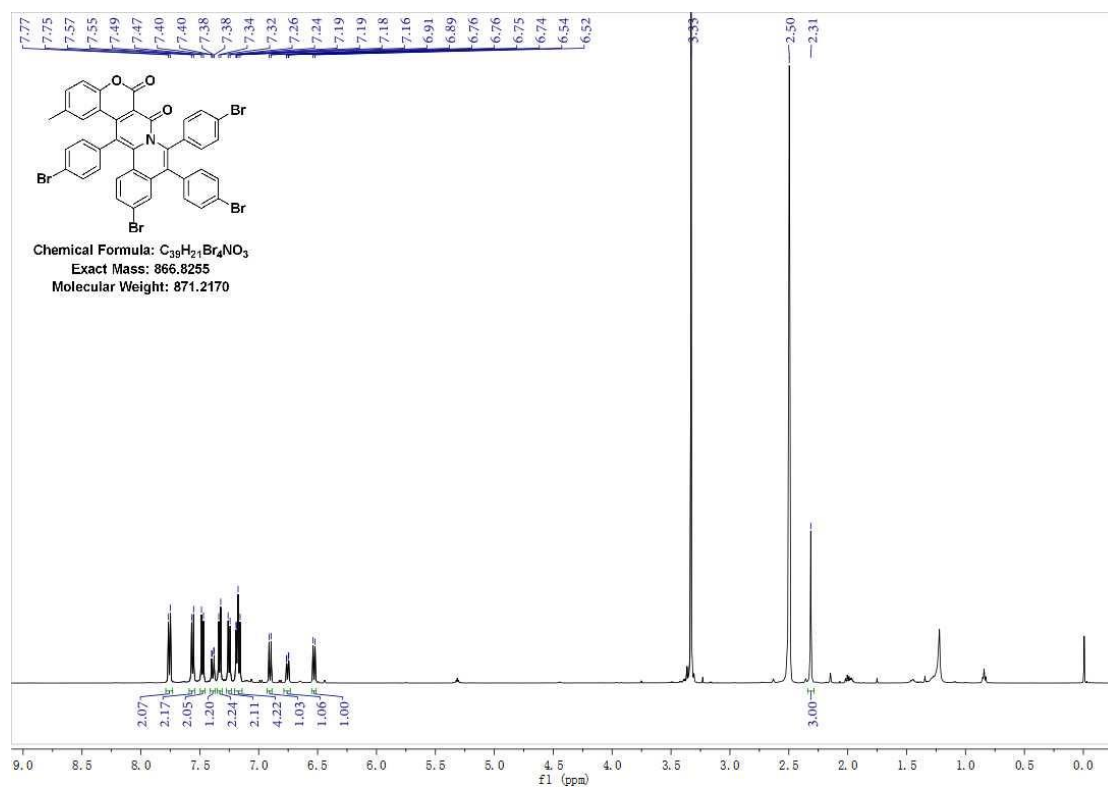

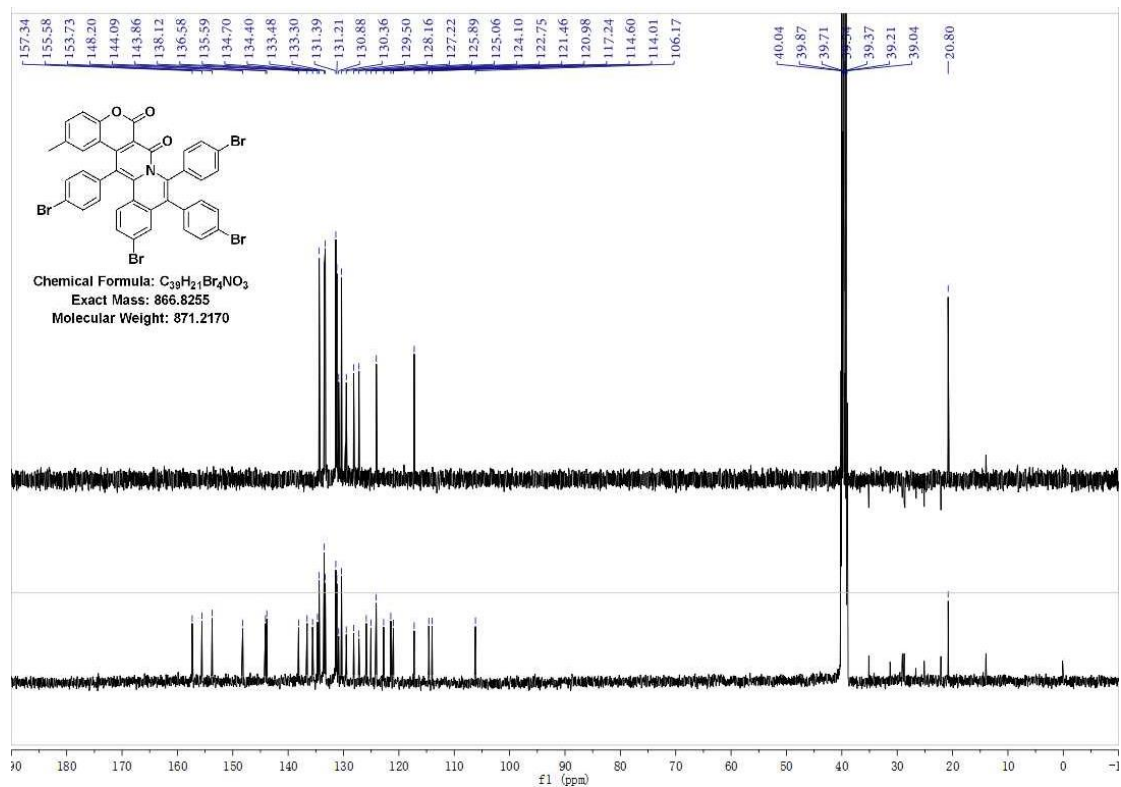

User Spectra

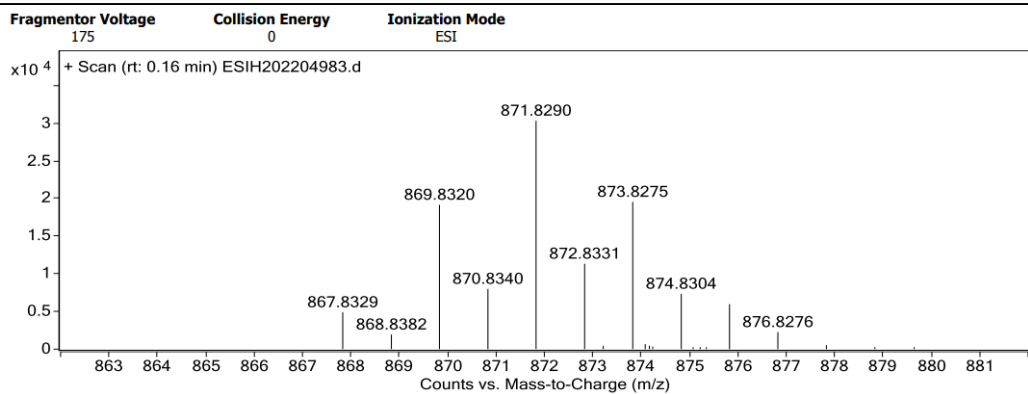

Formula Calculator Results

| m/z      | Calc m/z | Diff (mDa) | Diff (ppm) | Ion Formula      | Ion    |
|----------|----------|------------|------------|------------------|--------|
| 867.8329 | 867.8328 | -0.13      | -0.15      | C39 H22 Br4 N O3 | (M+H)+ |

End Of Report

2-Methoxy-9,10,15-triphenyl-6H,7H-chromeno[4',3':4,5]pyrido[2,1-a]isoquinoline-6,7-dione (**3ca**)

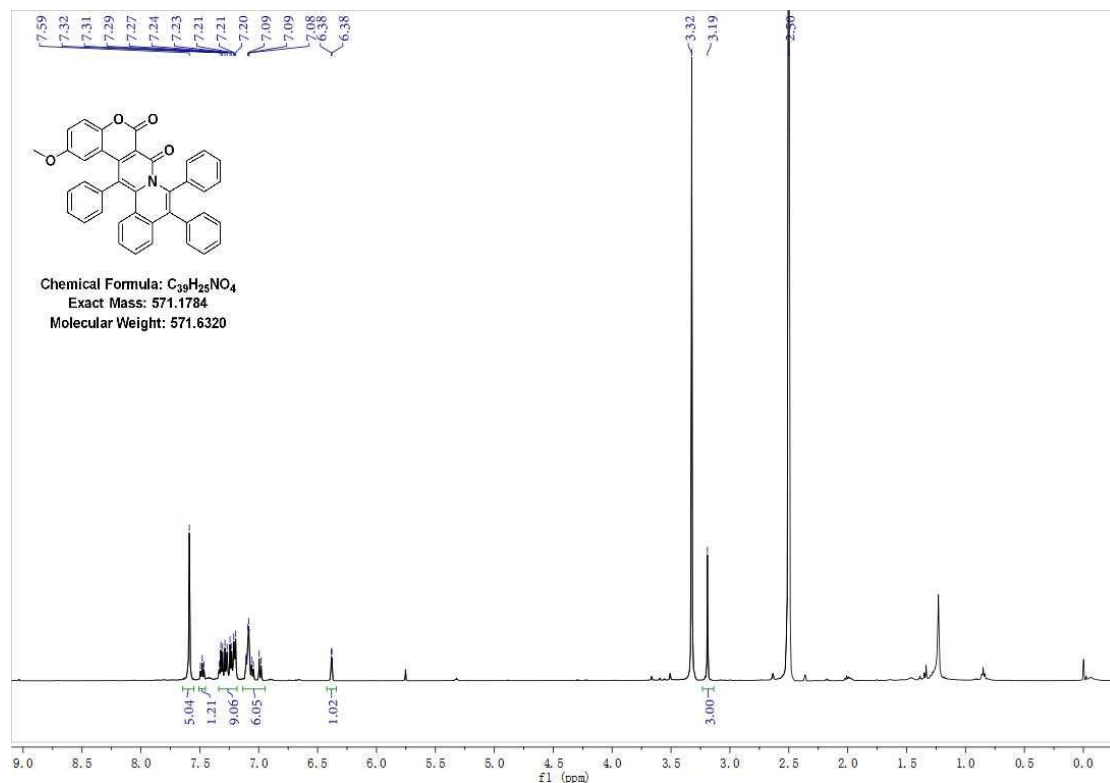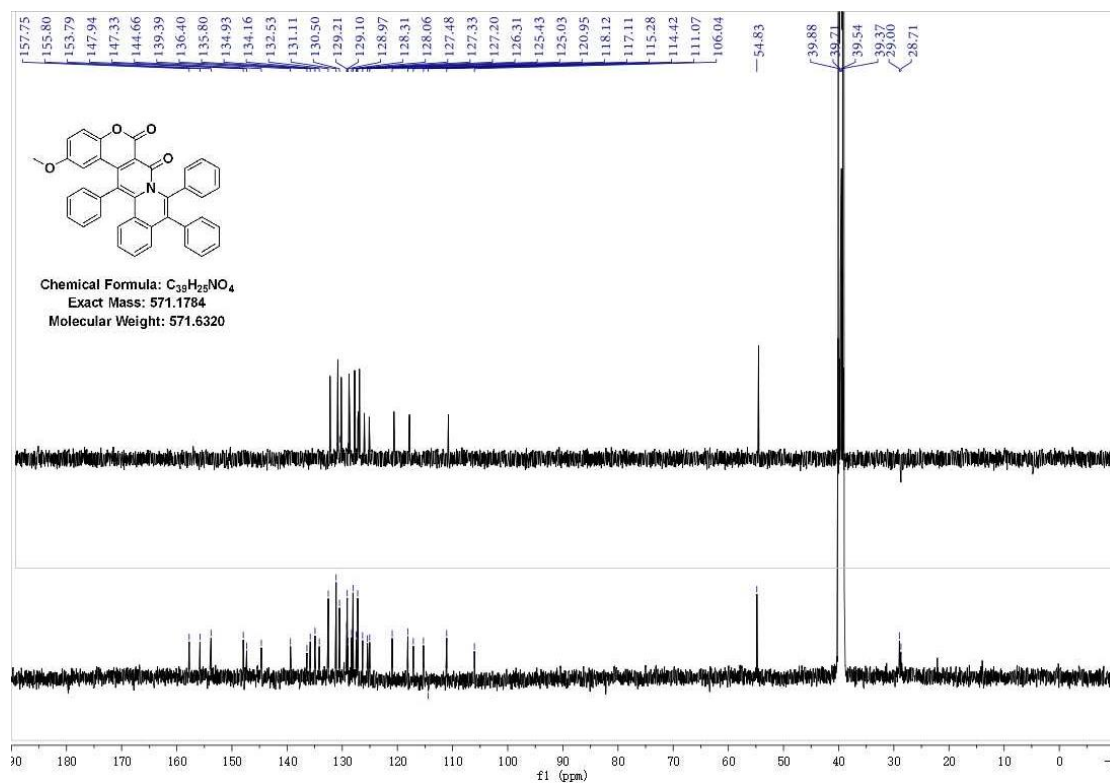

User Spectra

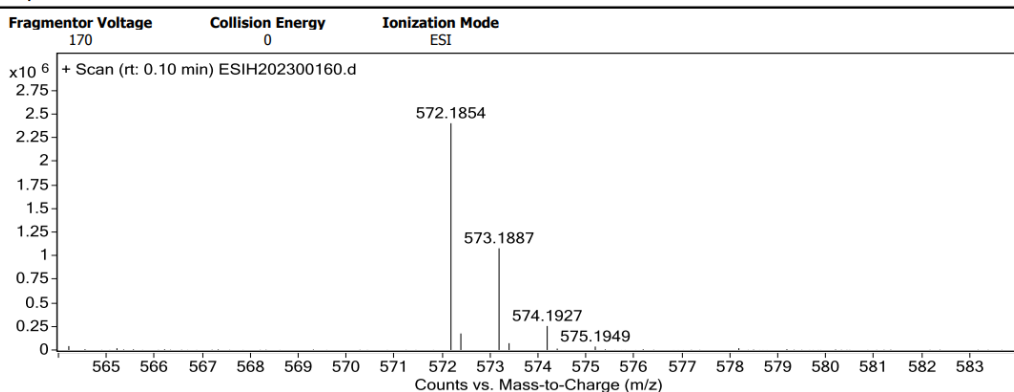

Formula Calculator Results

| m/z      | Calc m/z | Diff (mDa) | Diff (ppm) | Ion Formula                                      | Ion                |
|----------|----------|------------|------------|--------------------------------------------------|--------------------|
| 572.1854 | 572.1856 | 0.26       | 0.45       | C <sub>39</sub> H <sub>26</sub> N O <sub>4</sub> | (M+H) <sup>+</sup> |

*12-Fluoro-9,10,15-tris(4-fluorophenyl)-2-methoxy-6H,7H-chromeno[4',3':4,5]pyrido[2,1-a]isoquinoline-6,7-dione (3cd)*

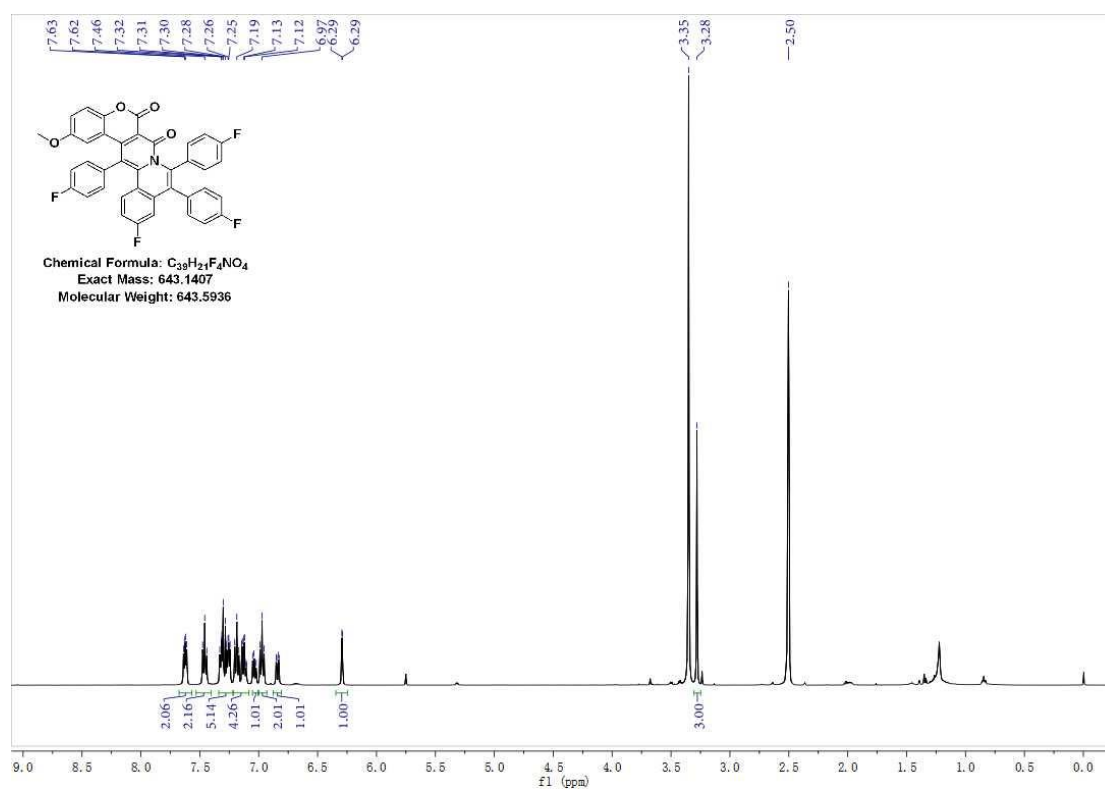

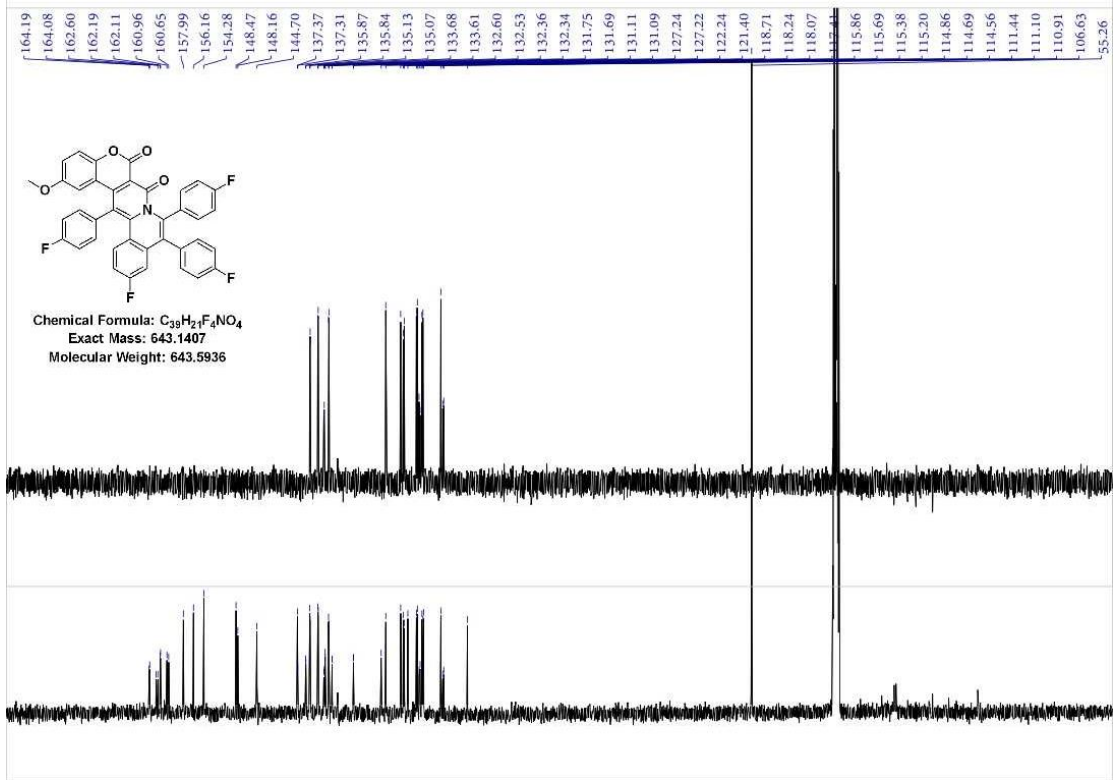

User Spectra

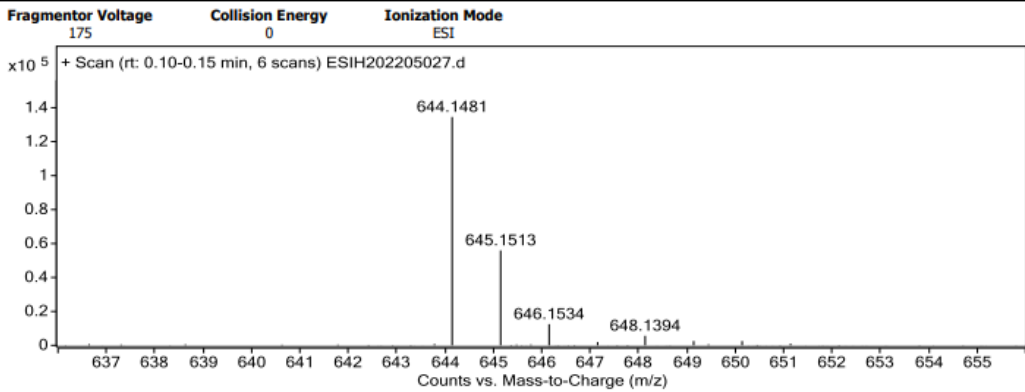

Formula Calculator Results

| m/z      | Calc m/z | Diff (mDa) | Diff (ppm) | Ion Formula                                                     | Ion                |
|----------|----------|------------|------------|-----------------------------------------------------------------|--------------------|
| 644.1481 | 644.1479 | -0.13      | -0.21      | C <sub>39</sub> H <sub>22</sub> F <sub>4</sub> N O <sub>4</sub> | (M+H) <sup>+</sup> |



12-Bromo-9,10,15-tris(4-bromophenyl)-2-methoxy-6H,7H-chromeno[4',3':4,5]pyrido  
[2,1-a]isoquinoline-6,7-dione (**3cf**)

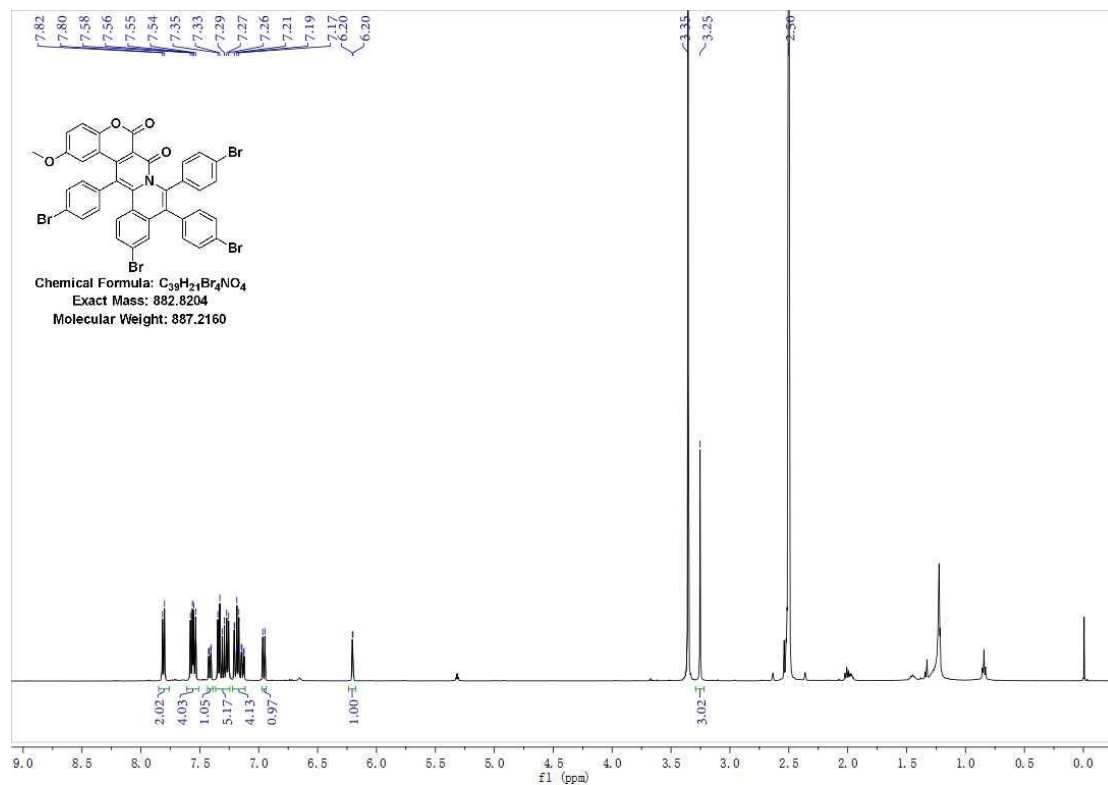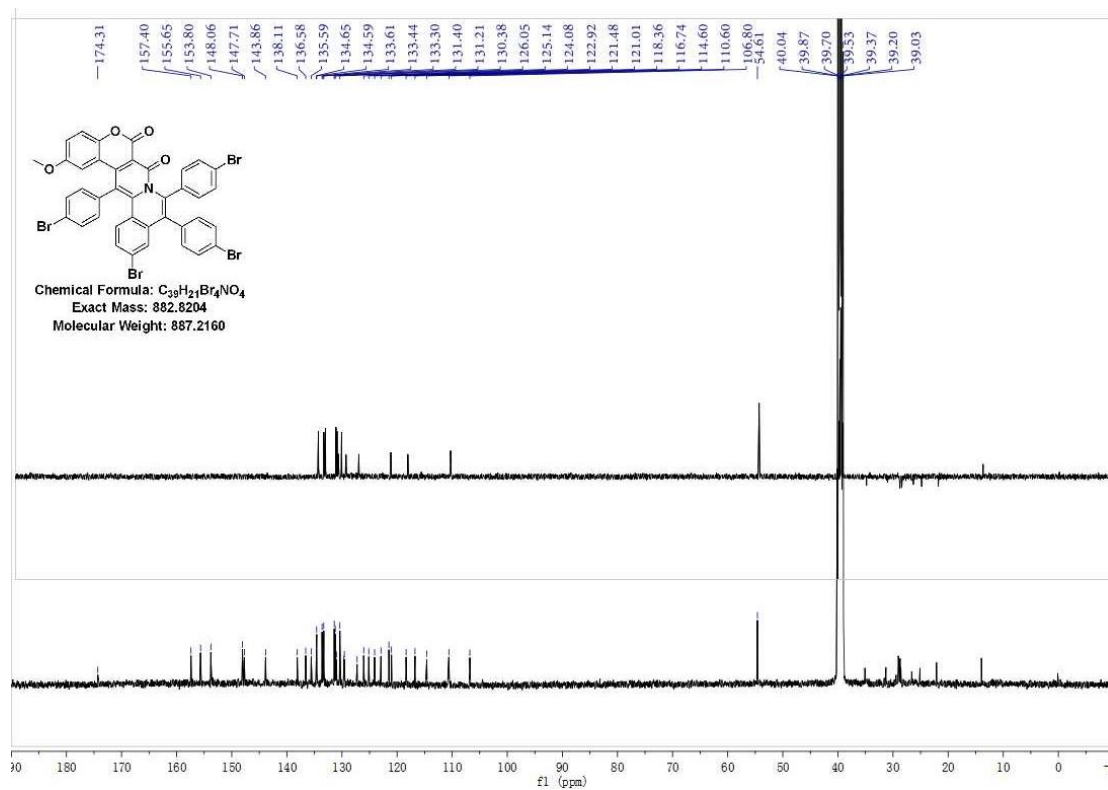

User Spectra

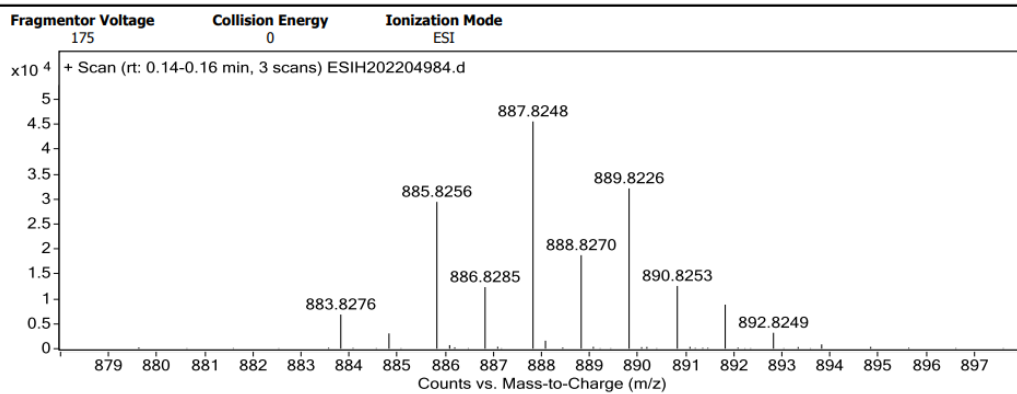

Formula Calculator Results

| m/z      | Calc m/z | Diff (mDa) | Diff (ppm) | Ion Formula                                                                   | Ion                |
|----------|----------|------------|------------|-------------------------------------------------------------------------------|--------------------|
| 883.8276 | 883.8277 | 0.09       | 0.1        | C <sub>39</sub> H <sub>22</sub> Br <sub>4</sub> N <sub>4</sub> O <sub>4</sub> | (M+H) <sup>+</sup> |

*2-Fluoro-9,10,15-triphenyl-6H,7H-chromeno[4',3':4,5]pyrido[2,1-a]isoquinoline-6,7-dione (3da)*

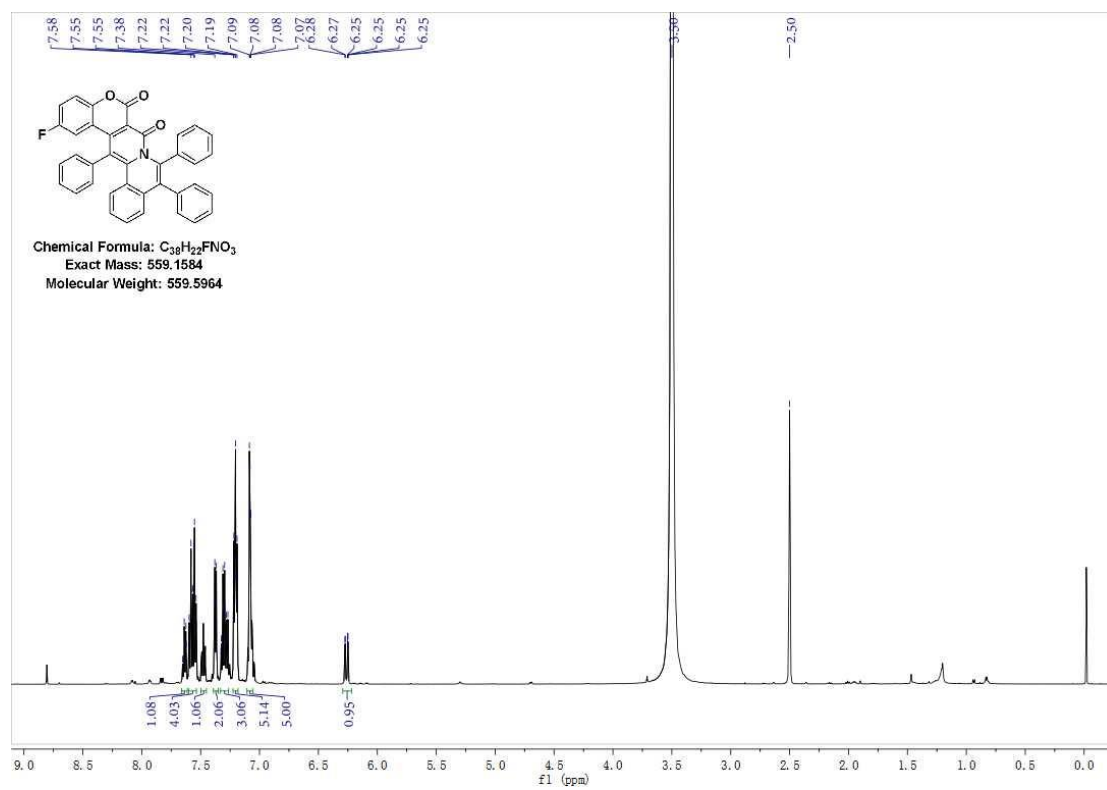

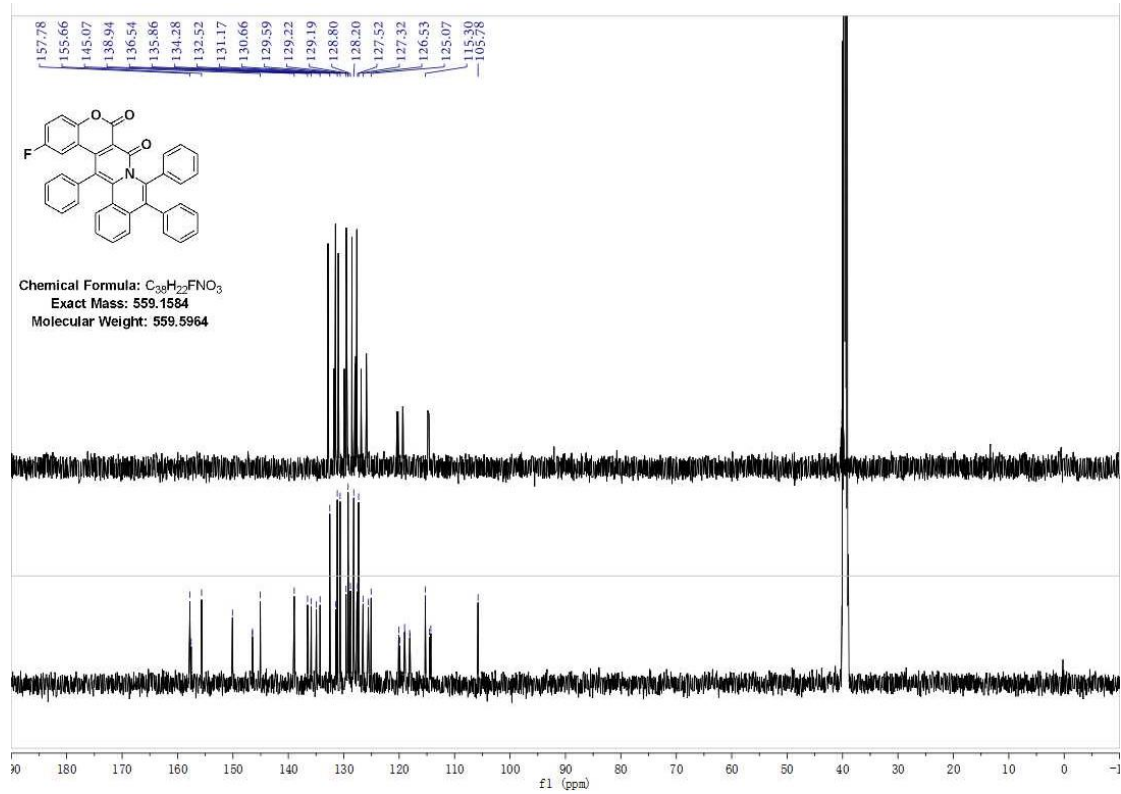

User Spectra

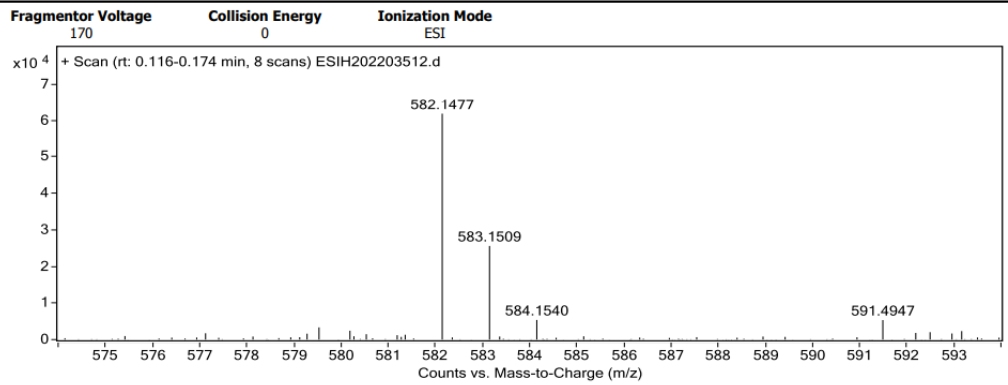

Formula Calculator Results

| m/z      | Calc m/z | Diff (mDa) | Diff (ppm) | Ion Formula       | Ion     |
|----------|----------|------------|------------|-------------------|---------|
| 582.1477 | 582.1476 | -0.12      | -0.2       | C38 H22 F N Na O3 | (M+Na)+ |

2-Fluoro-12-methyl-9,10,15-tri-p-tolyl-6H,7H-chromeno[4',3':4,5]pyrido[2,1a]isoquinoline-6,7-dione (**3db**)

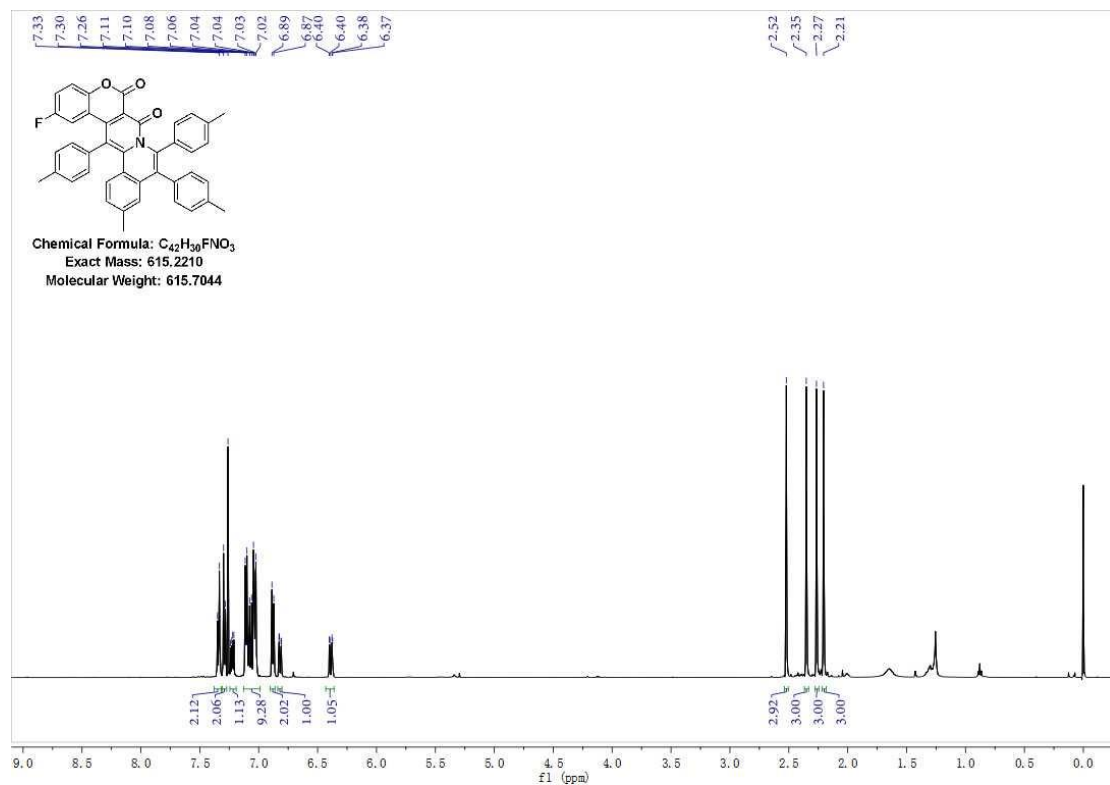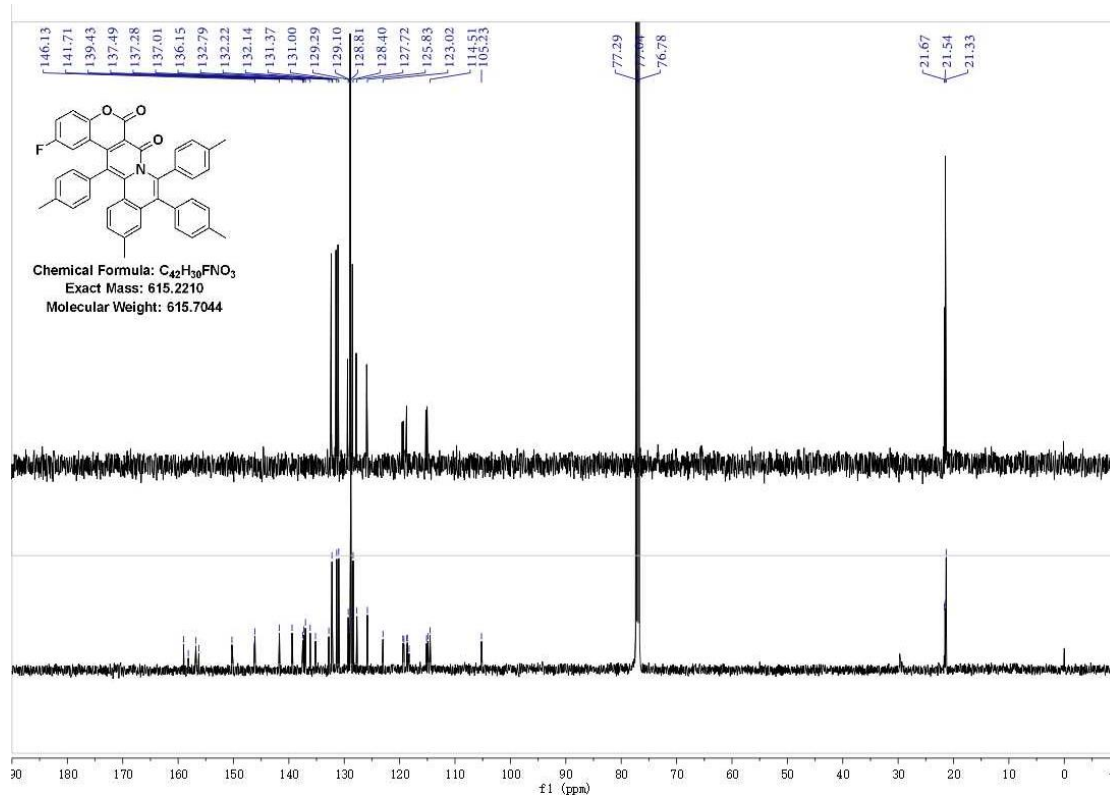

User Spectra

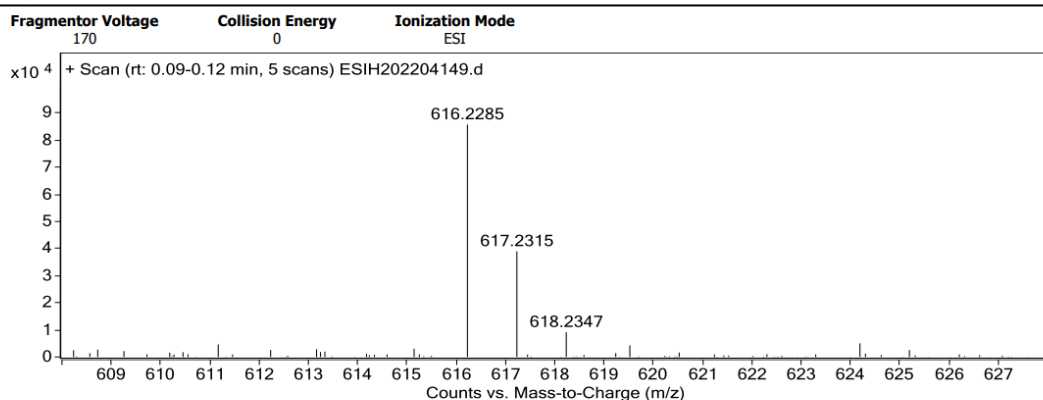

Formula Calculator Results

| m/z      | Calc m/z | Diff (mDa) | Diff (ppm) | Ion Formula    | Ion                |
|----------|----------|------------|------------|----------------|--------------------|
| 616.2285 | 616.2282 | -0.3       | -0.48      | C42 H31 F N O3 | (M+H) <sup>+</sup> |

12-Bromo-9,10,15-tris(4-bromophenyl)-2-fluoro-6H,7H-chromeno[4',3':4,5]pyrido[2,1-a]isoquinoline-6,7-dione (**3df**)

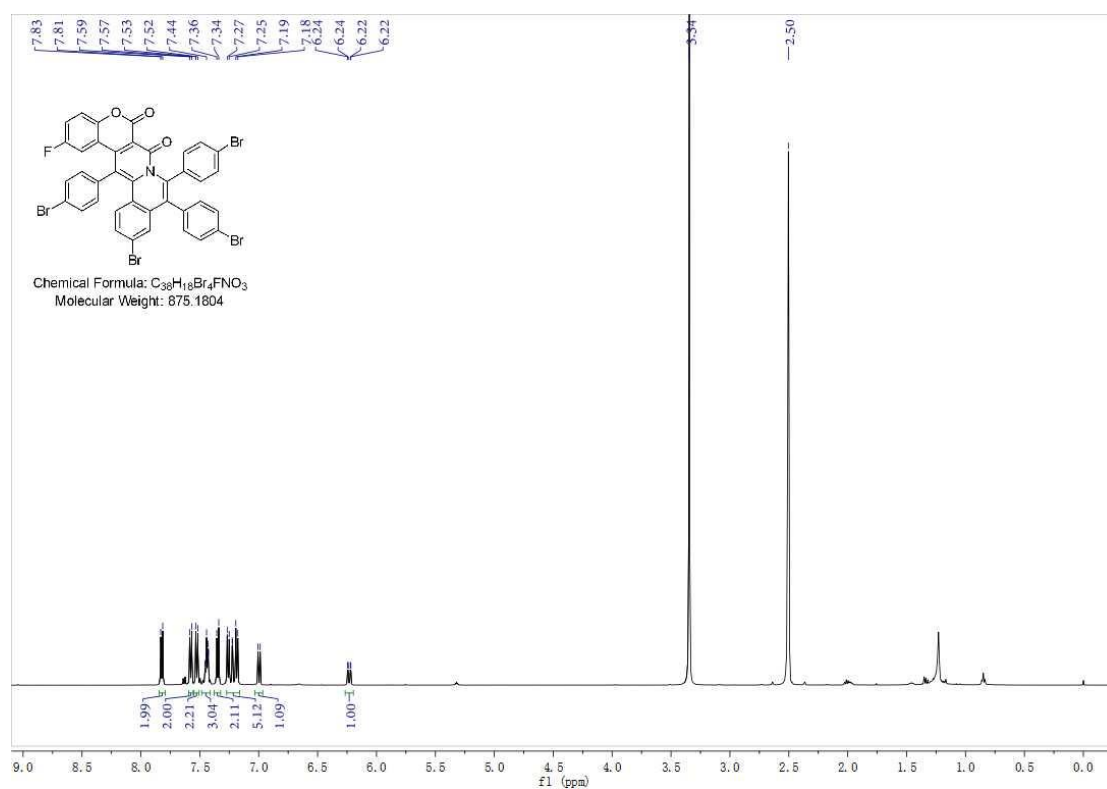

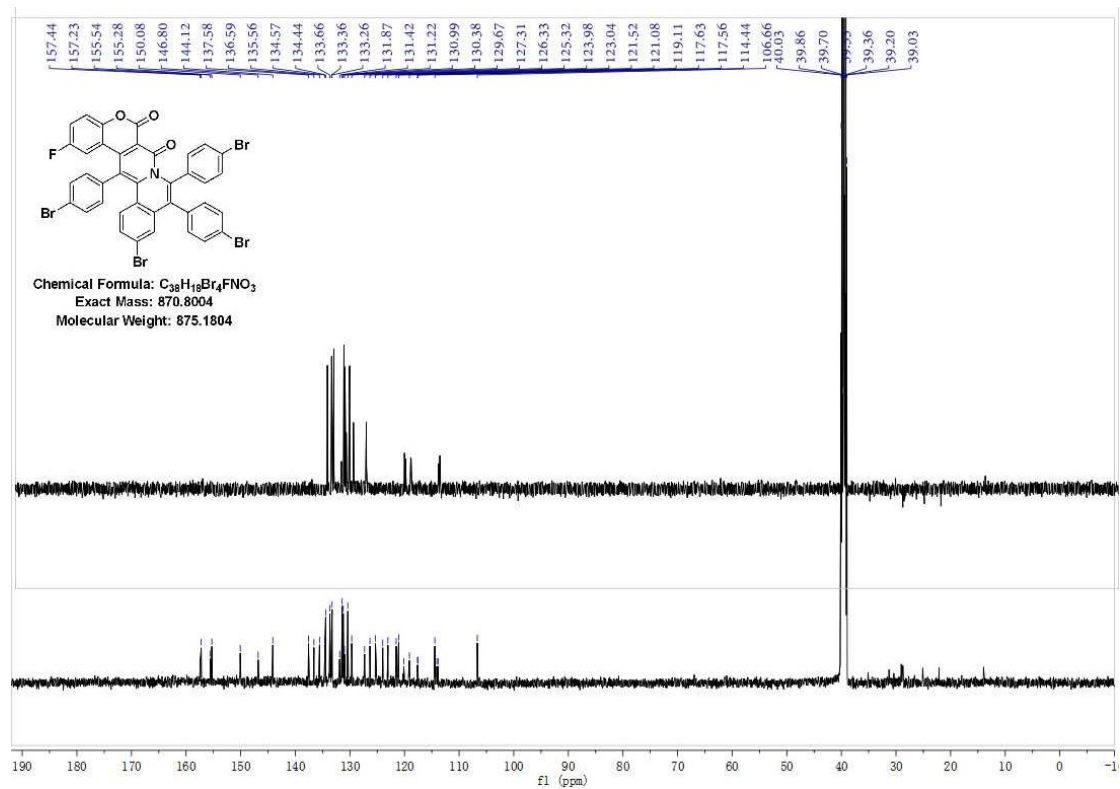

User Spectra

Fragmentor Voltage: 175  
 Collision Energy: 0  
 Ionization Mode: ESI

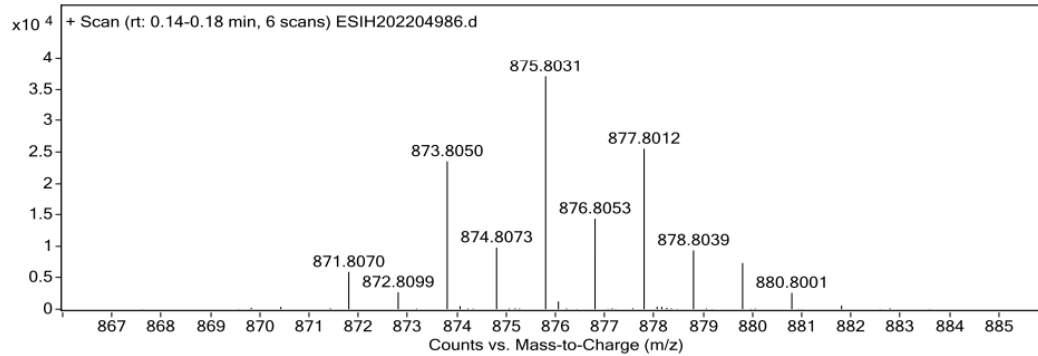

Formula Calculator Results

| m/z     | Calc m/z | Diff (mDa) | Diff (ppm) | Ion Formula        | Ion    |
|---------|----------|------------|------------|--------------------|--------|
| 871.807 | 871.8077 | 0.74       | 0.85       | C38 H19 Br4 F N O3 | (M+H)+ |

2-Chloro-9,10,15-triphenyl-6H,7H-chromeno[4',3':4,5]pyrido[2,1-a]isoquinoline-6,7-dione (3ea)

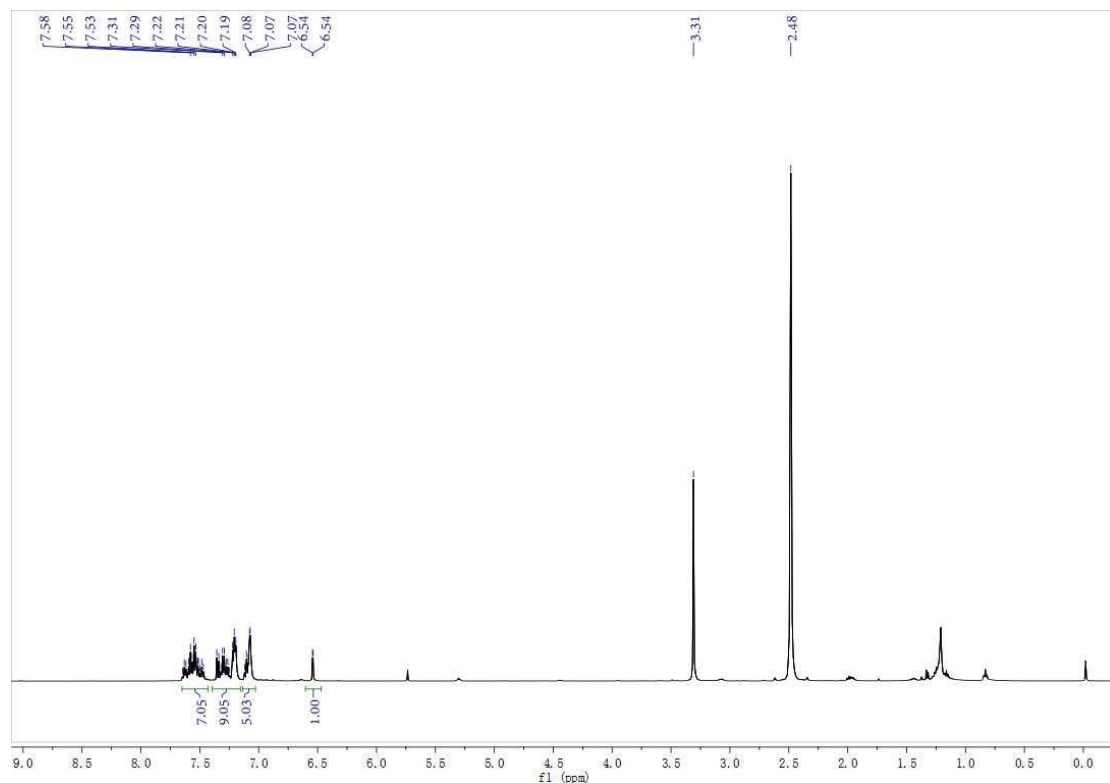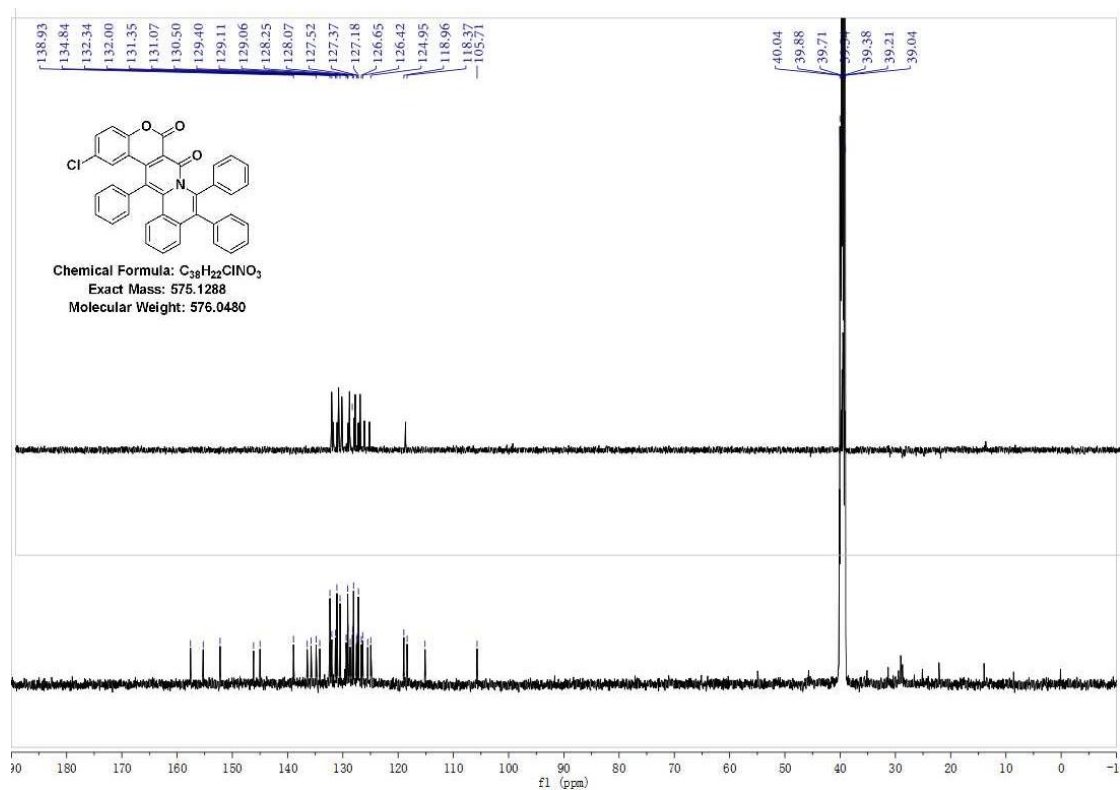

User Spectra

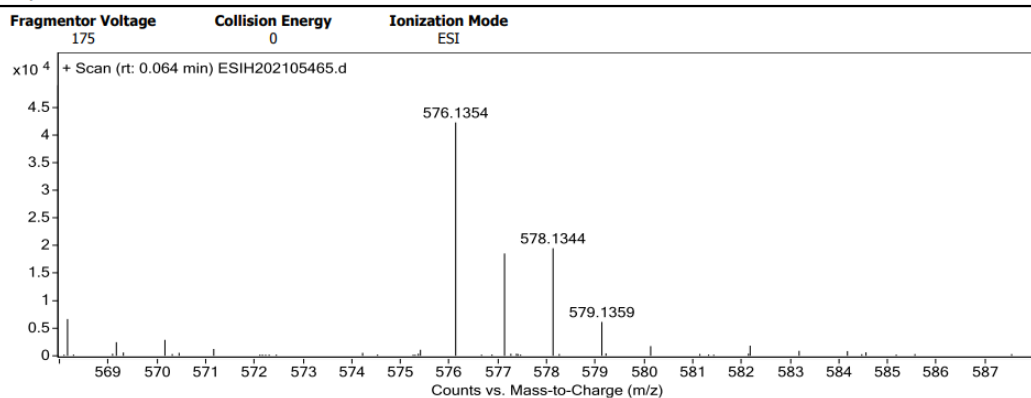

Formula Calculator Results

| m/z      | Calc m/z | Diff (mDa) | Diff (ppm) | Ion Formula                                         | Ion                |
|----------|----------|------------|------------|-----------------------------------------------------|--------------------|
| 576.1354 | 576.1361 | 0.66       | 1.14       | C <sub>38</sub> H <sub>23</sub> Cl N O <sub>3</sub> | (M+H) <sup>+</sup> |

*2-Chloro-12-methyl-9,10,15-tri-p-tolyl-6H,7H-chromeno[4',3':4,5]pyrido[2,1-a]isoquinoline-6,7-dione (3eb)*

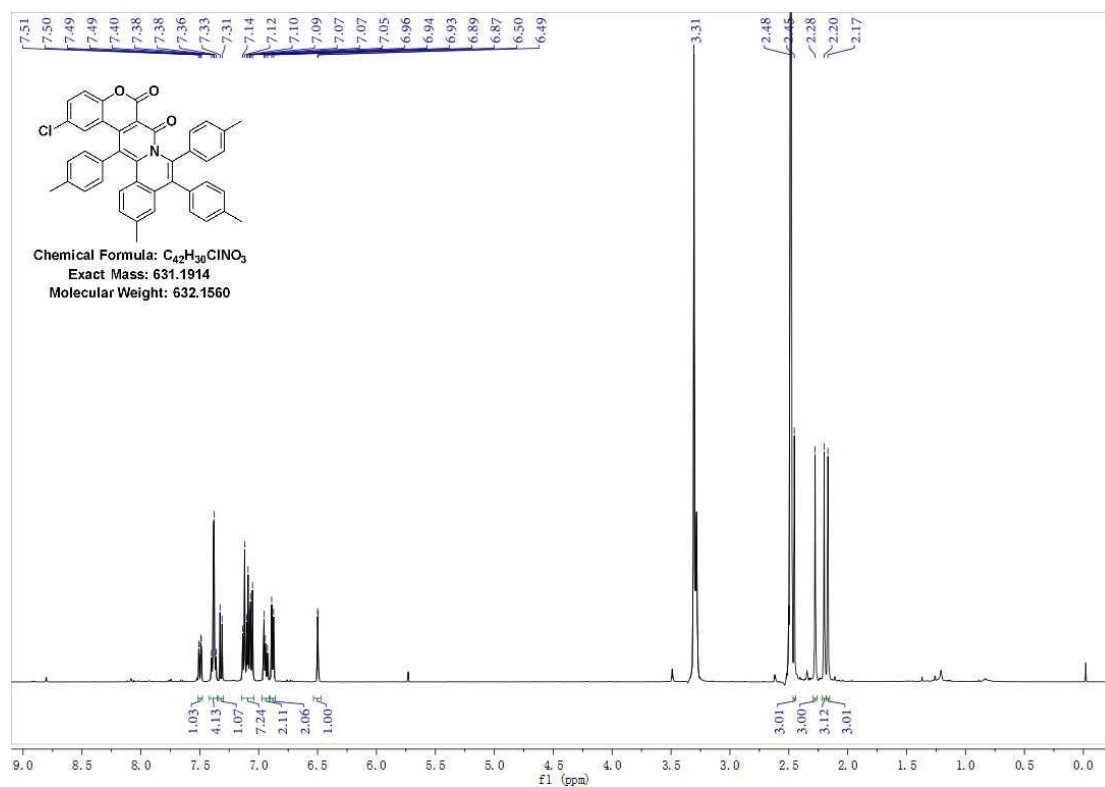



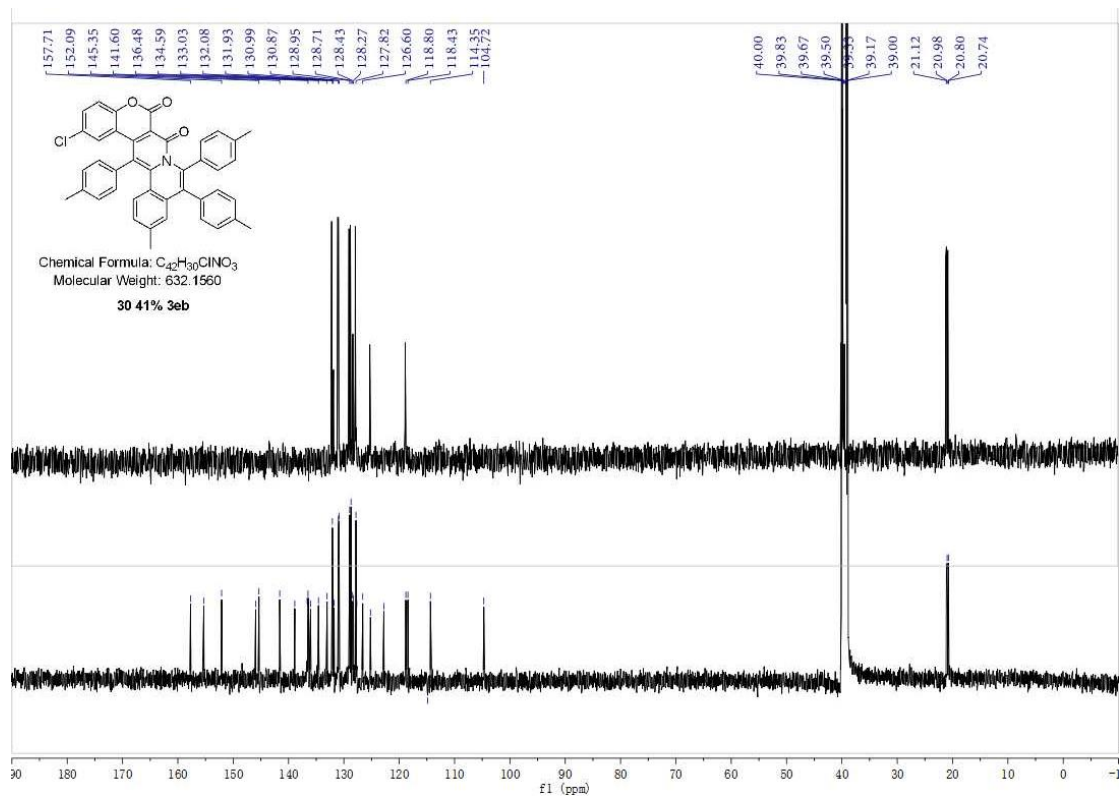

User Spectra

Fragmentor Voltage 200      Collision Energy 0      Ionization Mode ESI

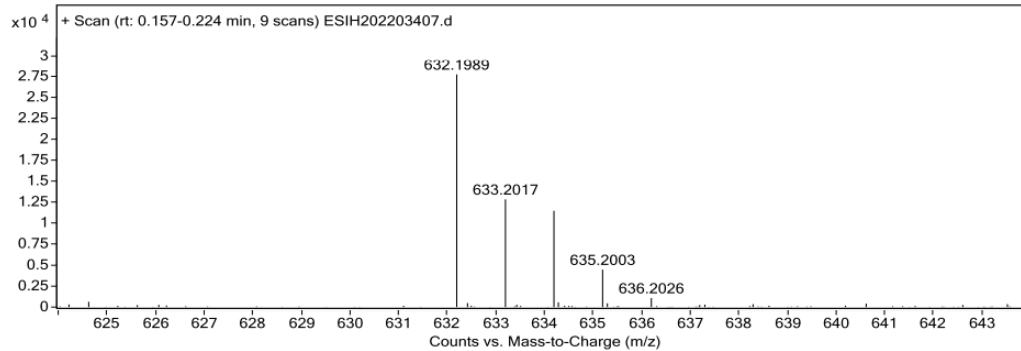

Formula Calculator Results

| m/z      | Calc m/z | Diff (mDa) | Diff (ppm) | Ion Formula                                         | Ion                |
|----------|----------|------------|------------|-----------------------------------------------------|--------------------|
| 632.1989 | 632.1987 | -0.16      | -0.25      | C <sub>42</sub> H <sub>31</sub> Cl N O <sub>3</sub> | (M+H) <sup>+</sup> |

2-Chloro-12-fluoro-9,10,15-tris(4-fluorophenyl)-6H,7H-chromeno[4',3':4,5]pyrido[2,1-a]isoquinoline-6,7-dione (**3ed**)

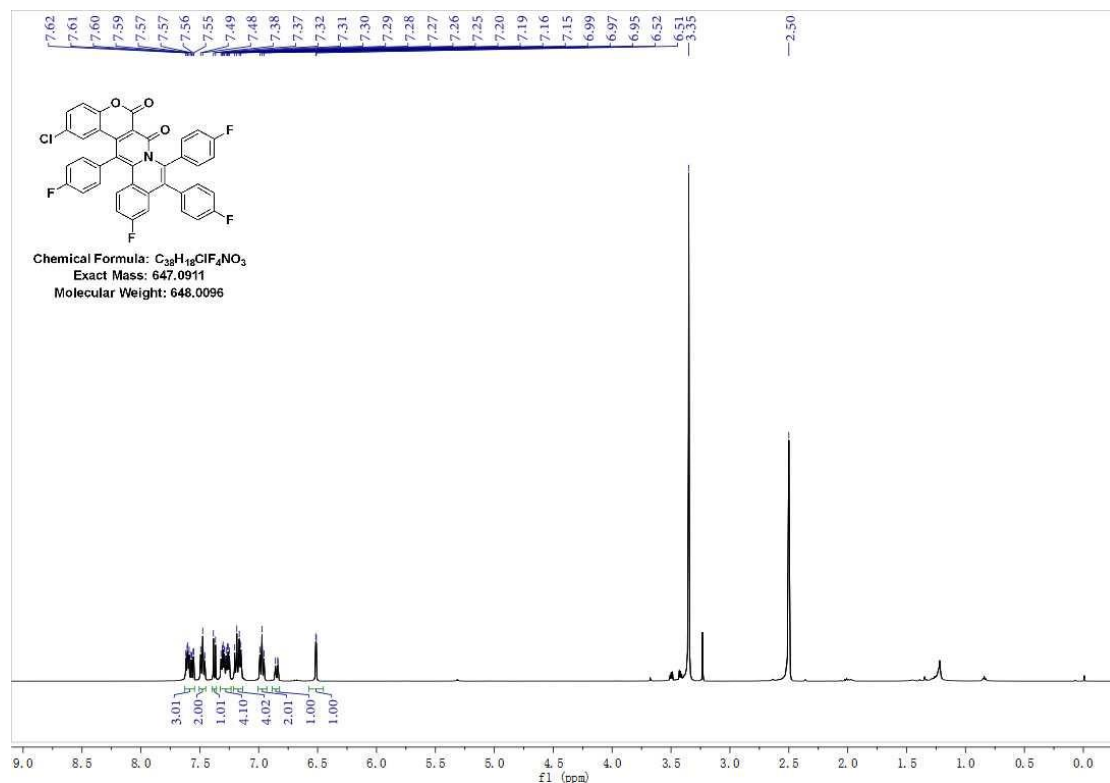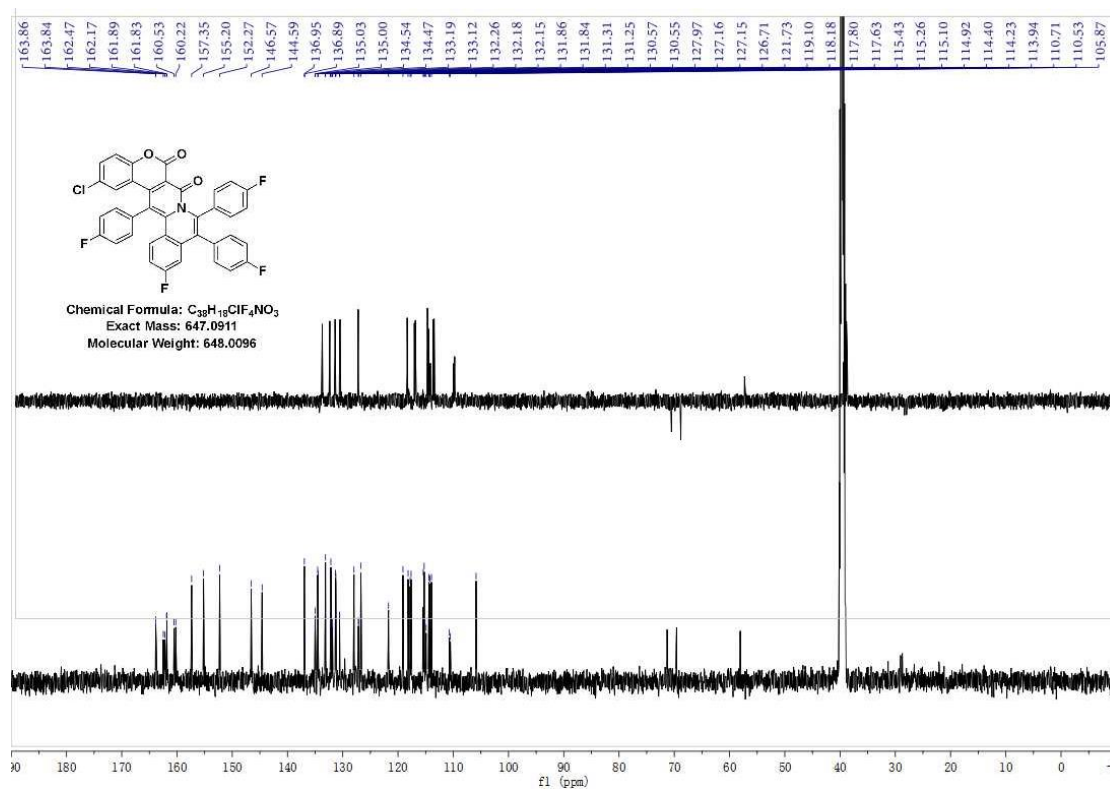

User Spectra

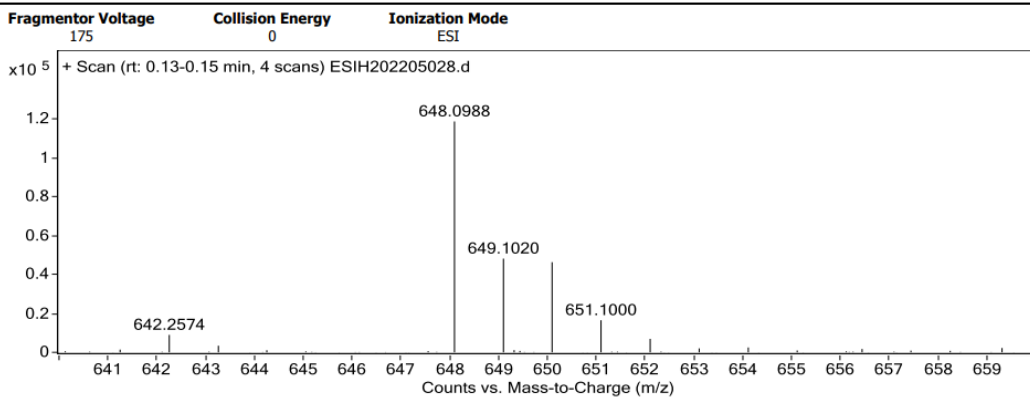

Formula Calculator Results

| m/z      | Calc m/z | Diff (mDa) | Diff (ppm) | Ion Formula        | Ion    |
|----------|----------|------------|------------|--------------------|--------|
| 648.0988 | 648.0984 | -0.43      | -0.66      | C38 H19 Cl F4 N O3 | (M+H)+ |

*12-Bromo-9,10,15-tris(4-bromophenyl)-2-chloro-6H,7H-chromeno[4',3':4,5]pyrido[2,1-a]isoquinoline-6,7-dione (3ef)*

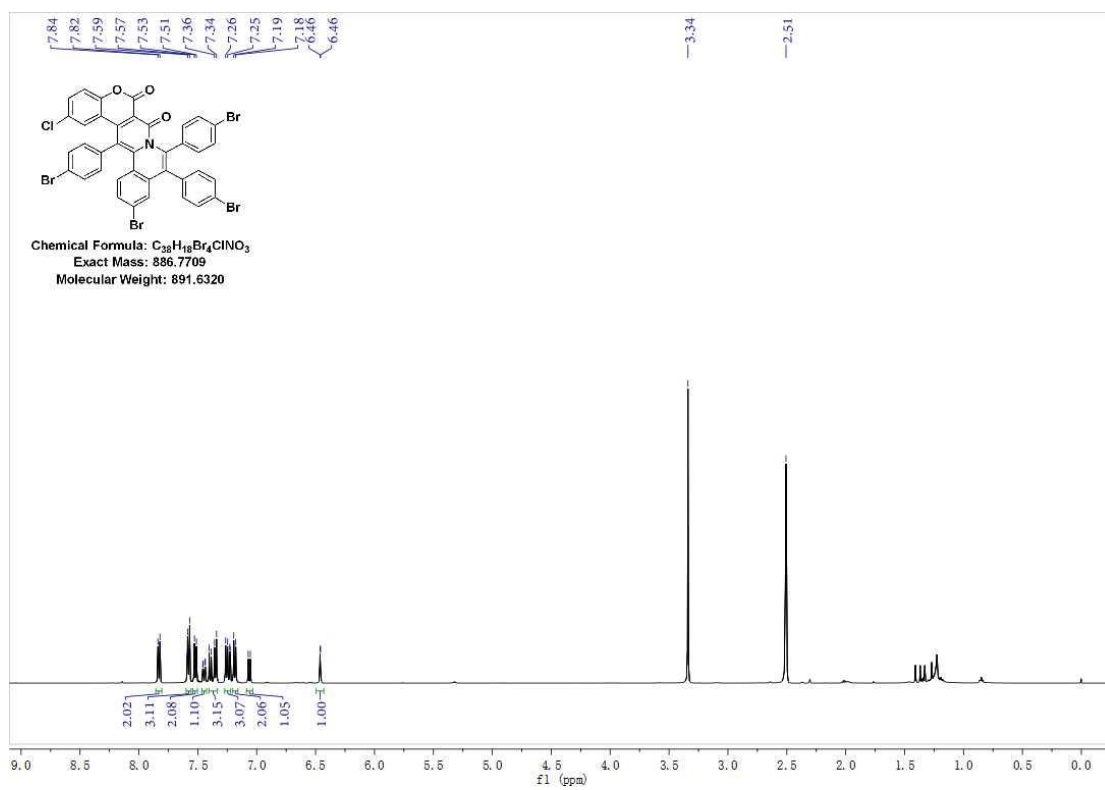

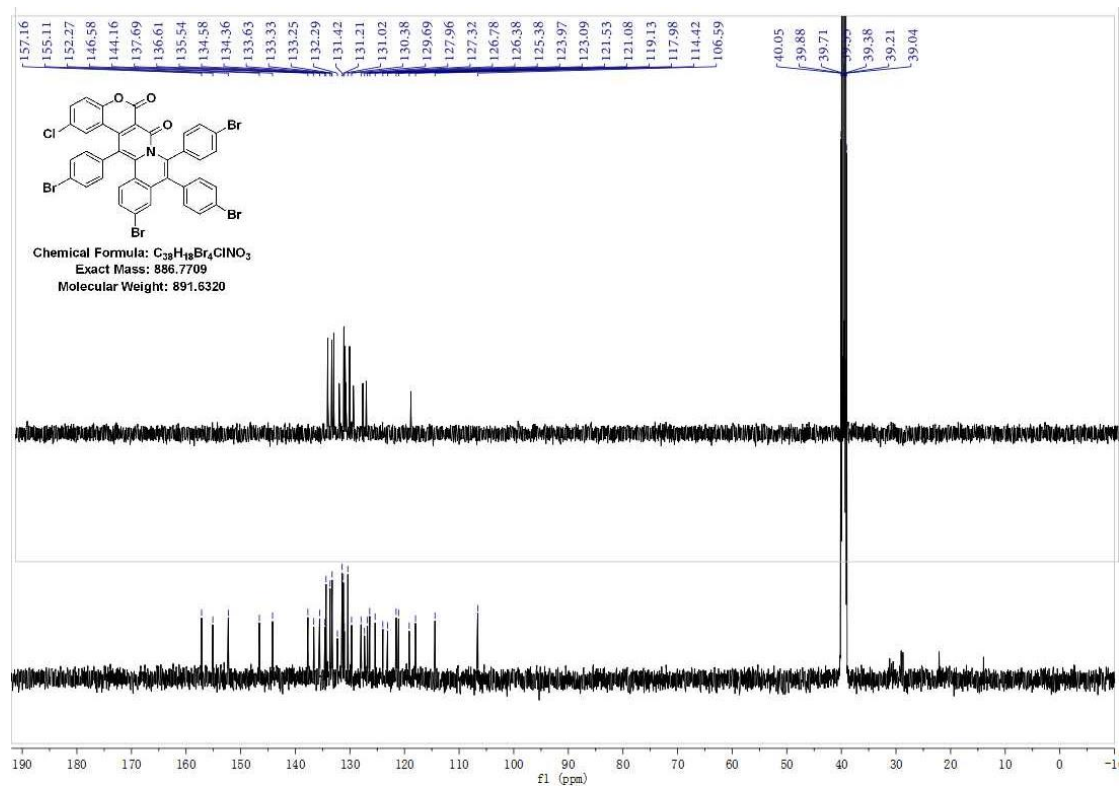

**User Spectra**

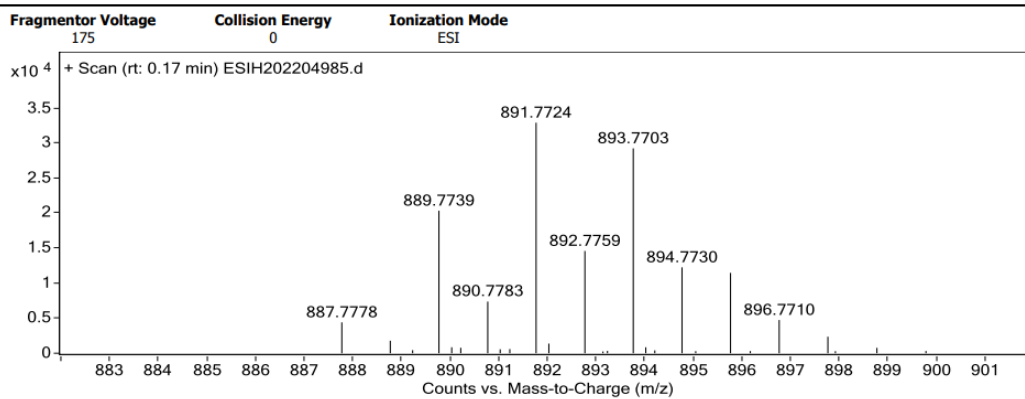

**Formula Calculator Results**

| m/z      | Calc m/z | Diff (mDa) | Diff (ppm) | Ion Formula         | Ion                |
|----------|----------|------------|------------|---------------------|--------------------|
| 887.7778 | 887.7781 | 0.4        | 0.45       | C38 H19 Br4 Cl N O3 | (M+H) <sup>+</sup> |

*9,10,15-Triphenyl-2-(trifluoromethyl)-6H,7H-chromeno[4',3':4,5]pyrido[2,1-a]isoquinoline-6,7-dione (3fa)*

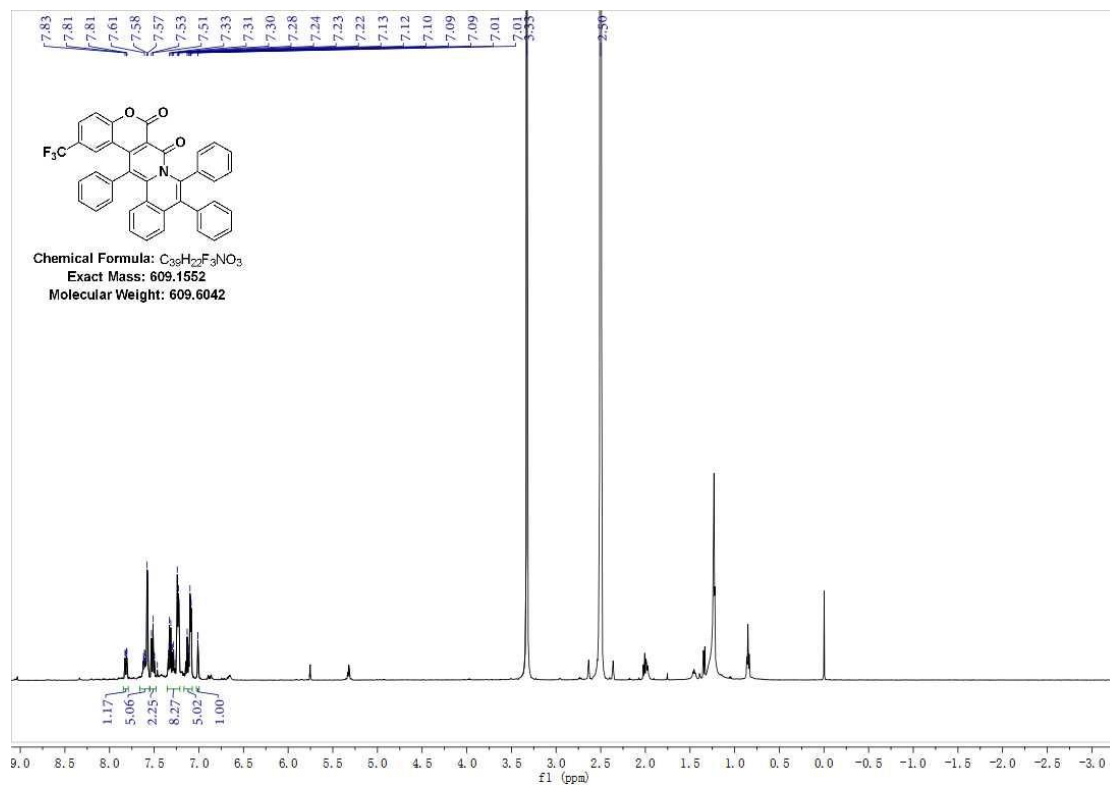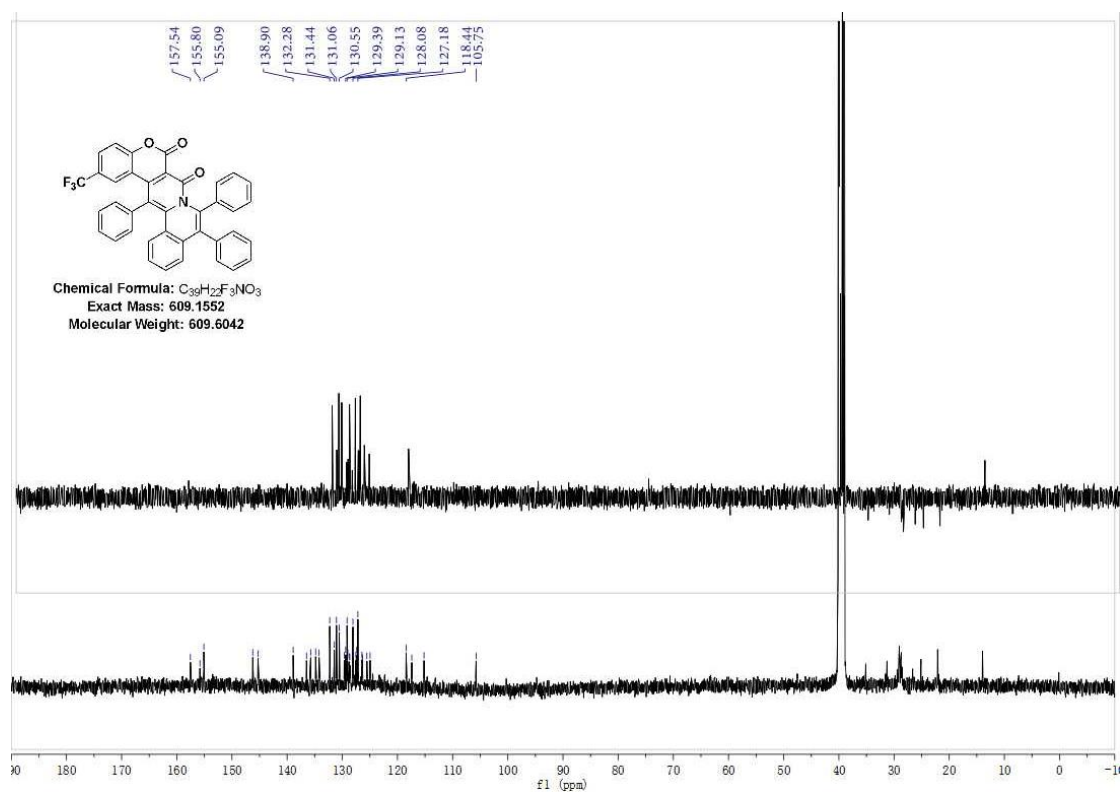

User Spectra

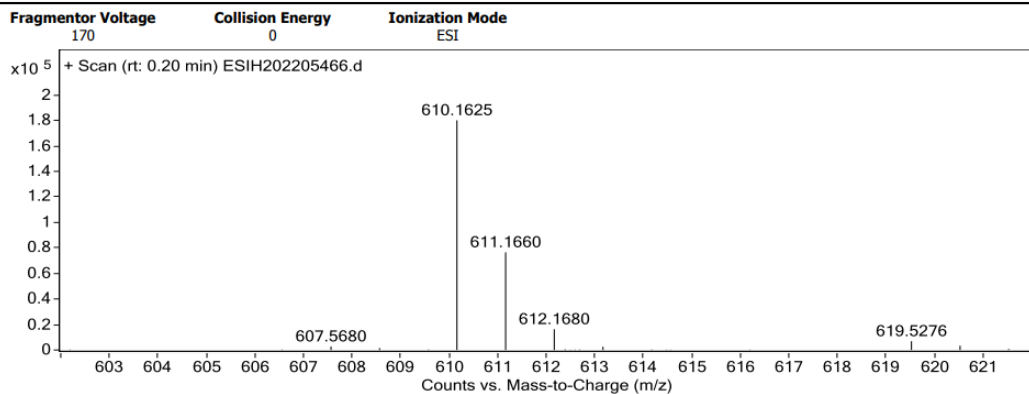

Formula Calculator Results

| m/z      | Calc m/z | Diff (mDa) | Diff (ppm) | Ion Formula                                                                  | Ion                |
|----------|----------|------------|------------|------------------------------------------------------------------------------|--------------------|
| 610.1625 | 610.1625 | -0.07      | -0.11      | C <sub>39</sub> H <sub>23</sub> F <sub>3</sub> N <sub>3</sub> O <sub>3</sub> | (M+H) <sup>+</sup> |

*3-Methyl-9,10,15-triphenyl-6H,7H-chromeno[4',3':4,5]pyrido[2,1-a]isoquinoline-6,7-dione (3ga)*

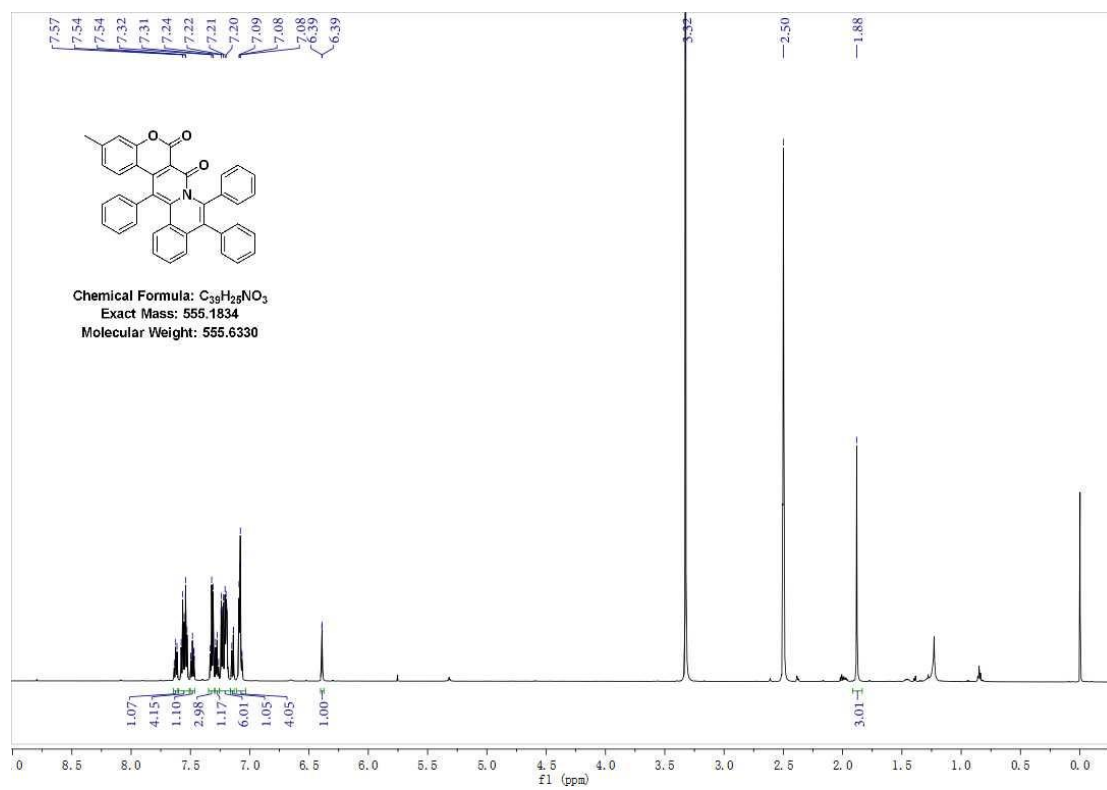

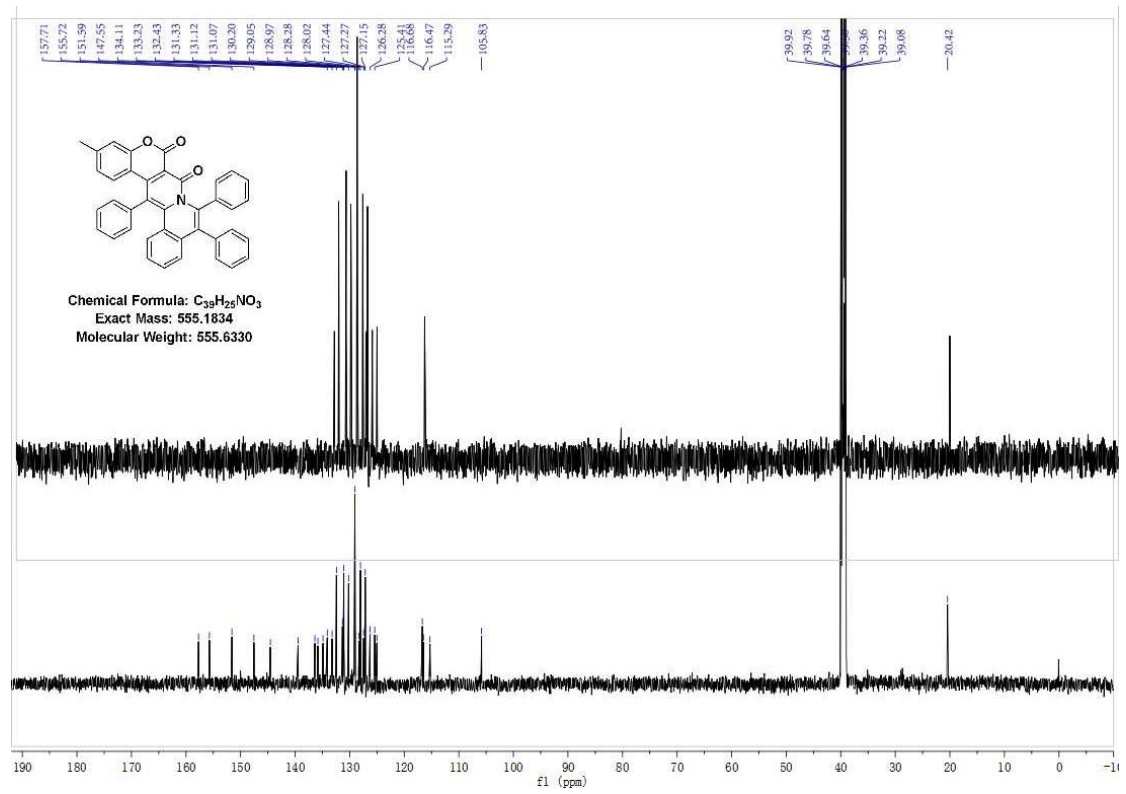

User Spectra

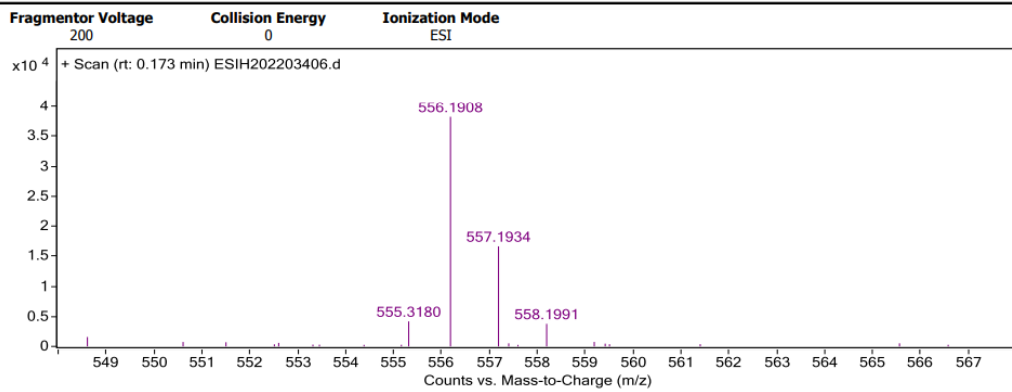

Formula Calculator Results

| m/z      | Calc m/z | Diff (mDa) | Diff (ppm) | Ion Formula         | Ion                |
|----------|----------|------------|------------|---------------------|--------------------|
| 556.1908 | 556.1907 | -0.09      | -0.15      | $C_{39}H_{26}N O_3$ | (M+H) <sup>+</sup> |

*3,12-Dimethyl-9,10,15-tri-p-tolyl-6H,7H-chromeno[4',3':4,5]pyrido[2,1-a]isoquinoline-6,7-dione (3gb)*

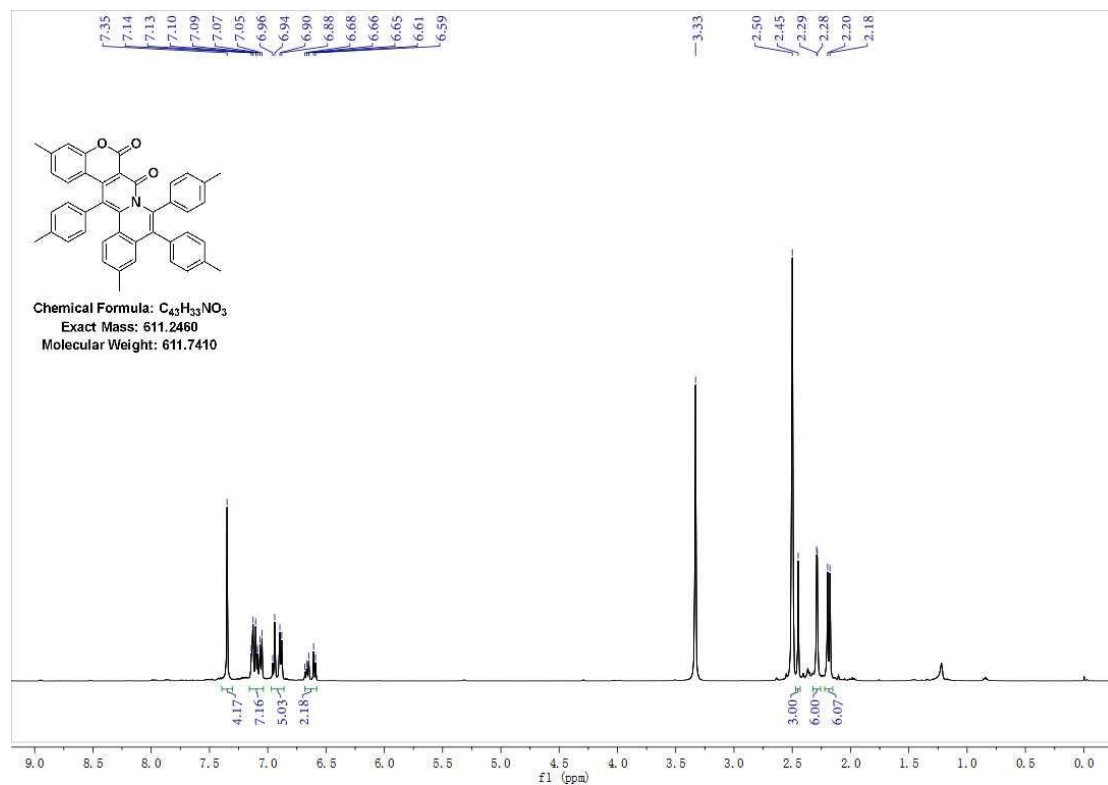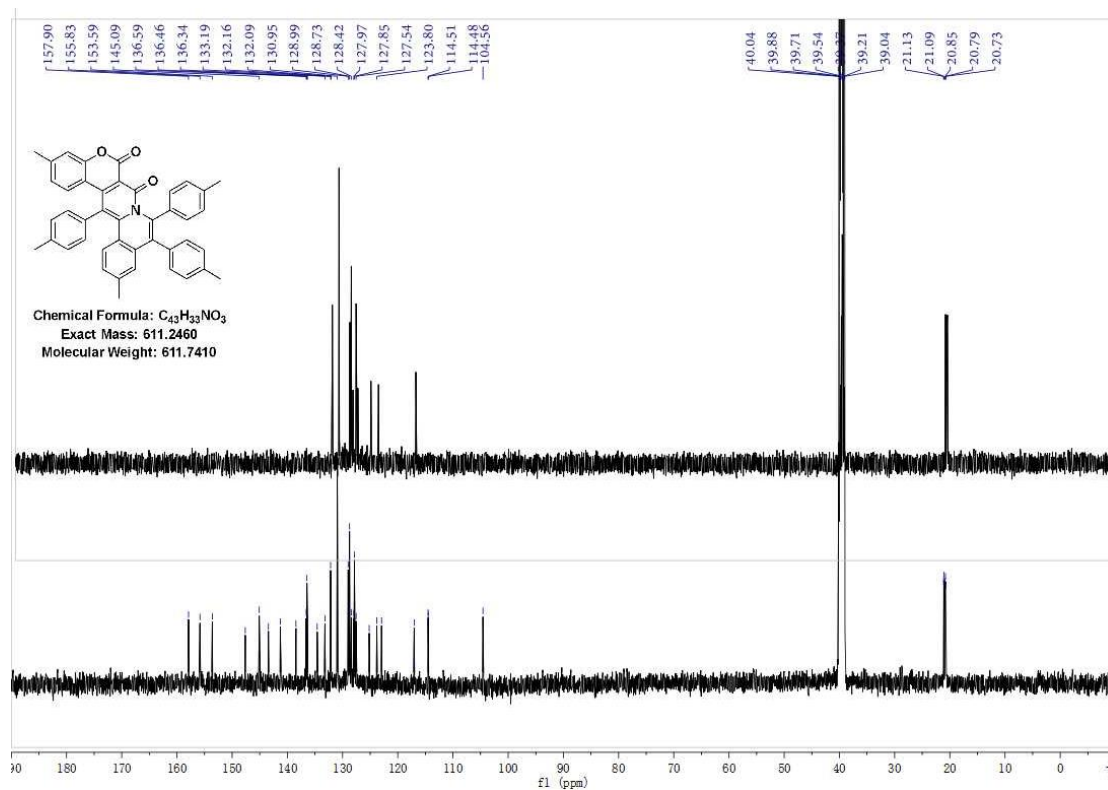



## User Spectra

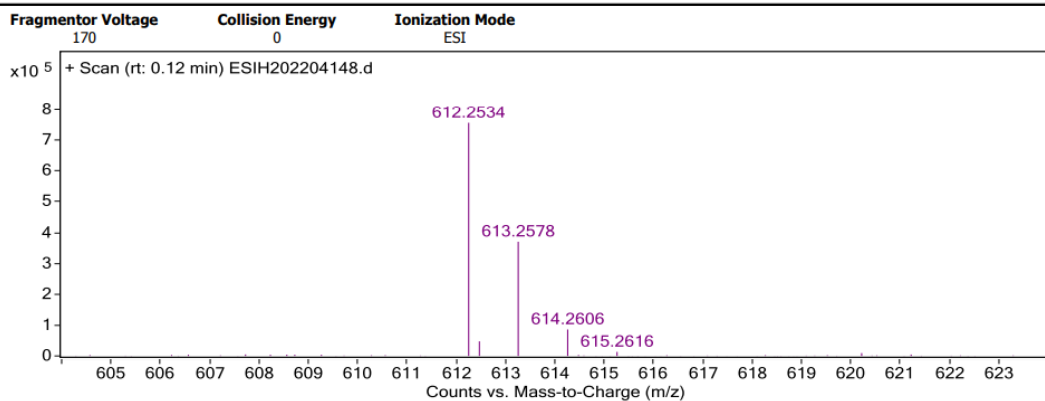

## Formula Calculator Results

| m/z      | Calc m/z | Diff (mDa) | Diff (ppm) | Ion Formula  | Ion    |
|----------|----------|------------|------------|--------------|--------|
| 612.2534 | 612.2533 | -0.1       | -0.17      | C43 H34 N O3 | (M+H)+ |

*12-Chloro-9,10,15-tris(4-chlorophenyl)-3-methyl-6H,7H-chromeno[4',3':4,5]pyrido[2,1-a]isoquinoline-6,7-dione (3ge)*

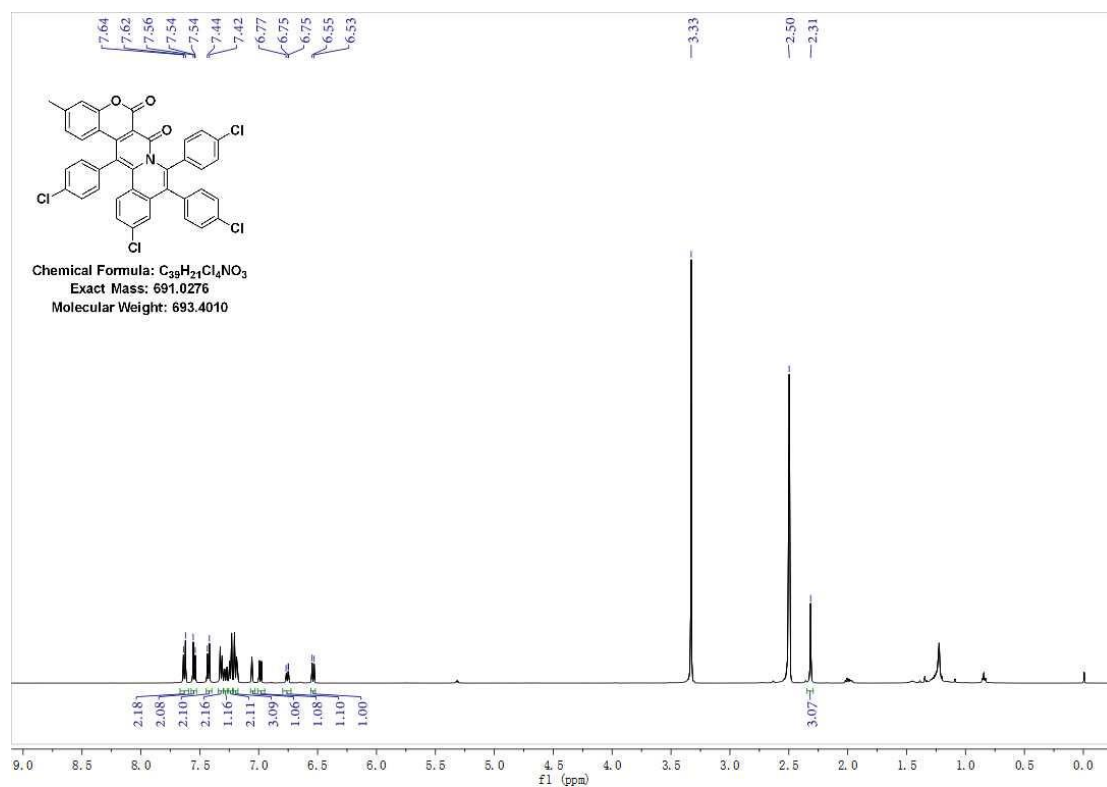

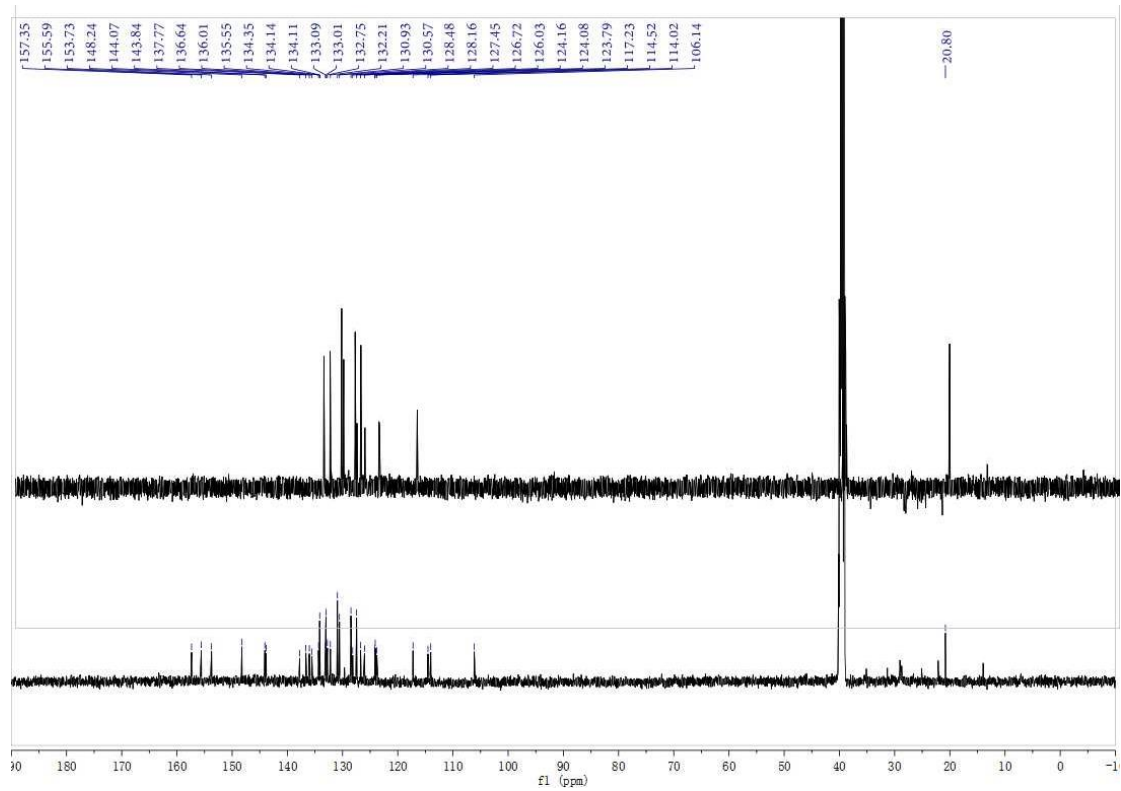

**User Spectra**

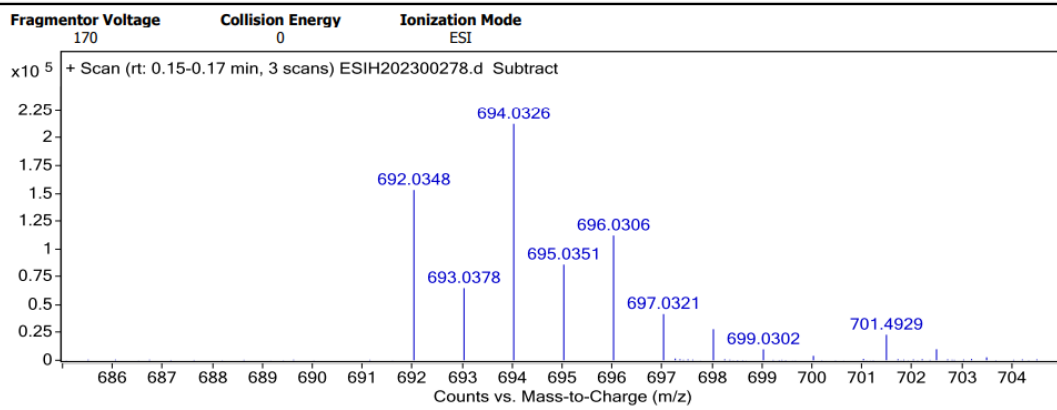

**Formula Calculator Results**

| m/z      | Calc m/z | Diff (mDa) | Diff (ppm) | Ion Formula                                                      | Ion                |
|----------|----------|------------|------------|------------------------------------------------------------------|--------------------|
| 692.0348 | 692.0348 | 0.06       | 0.08       | C <sub>39</sub> H <sub>22</sub> Cl <sub>4</sub> N O <sub>3</sub> | (M+H) <sup>+</sup> |

End Of Report

1,2-Dibutyl-4H-chromeno[3,4-c]pyridine-4,5(3H)-dione (3ah)

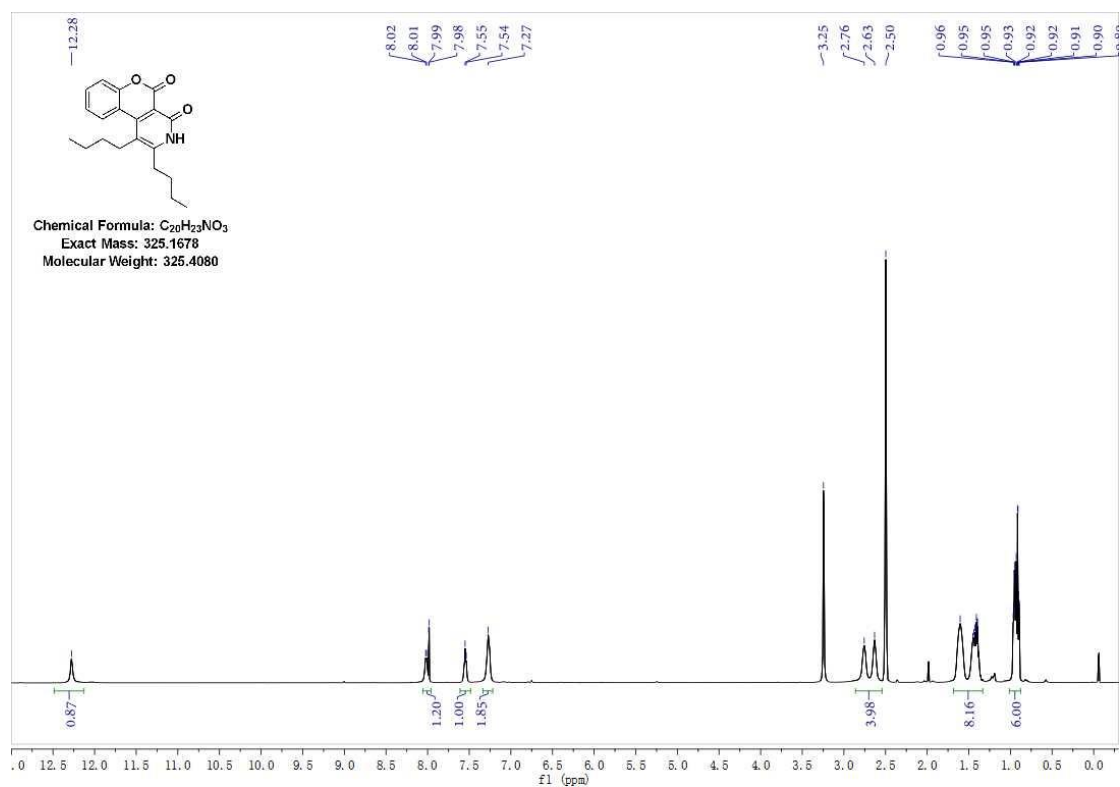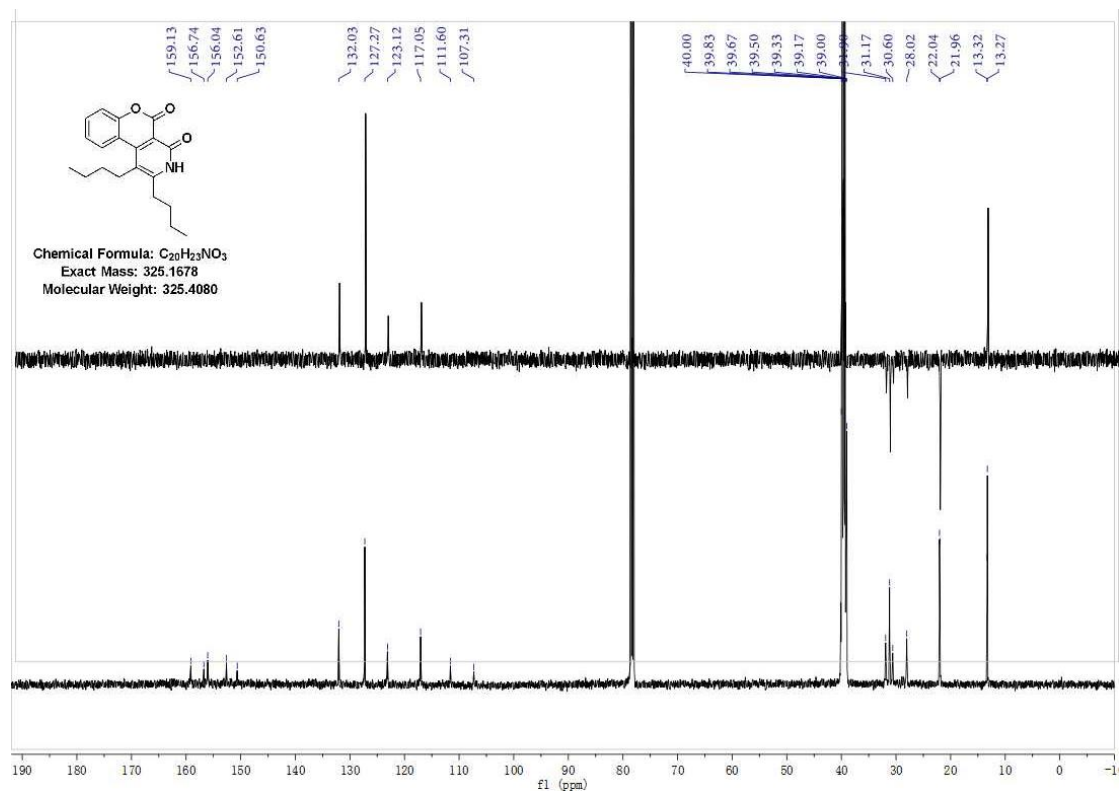

## User Spectra

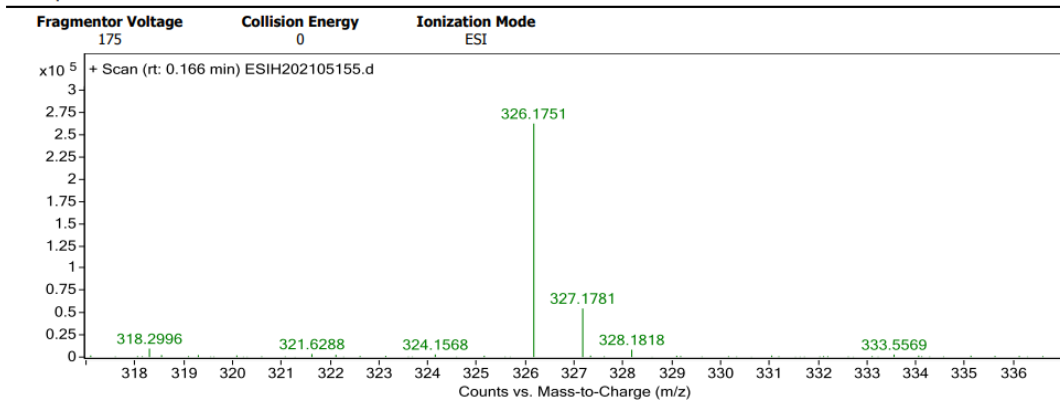

## Formula Calculator Results

| m/z      | Calc m/z | Diff (mDa) | Diff (ppm) | Ion Formula                                      | Ion                |
|----------|----------|------------|------------|--------------------------------------------------|--------------------|
| 326.1751 | 326.1751 | -0.02      | -0.06      | C <sub>20</sub> H <sub>24</sub> N O <sub>3</sub> | (M+H) <sup>+</sup> |

*1,2-Dipentyl-4H-chromeno[3,4-c]pyridine-4,5(3H)-dione (3ai)*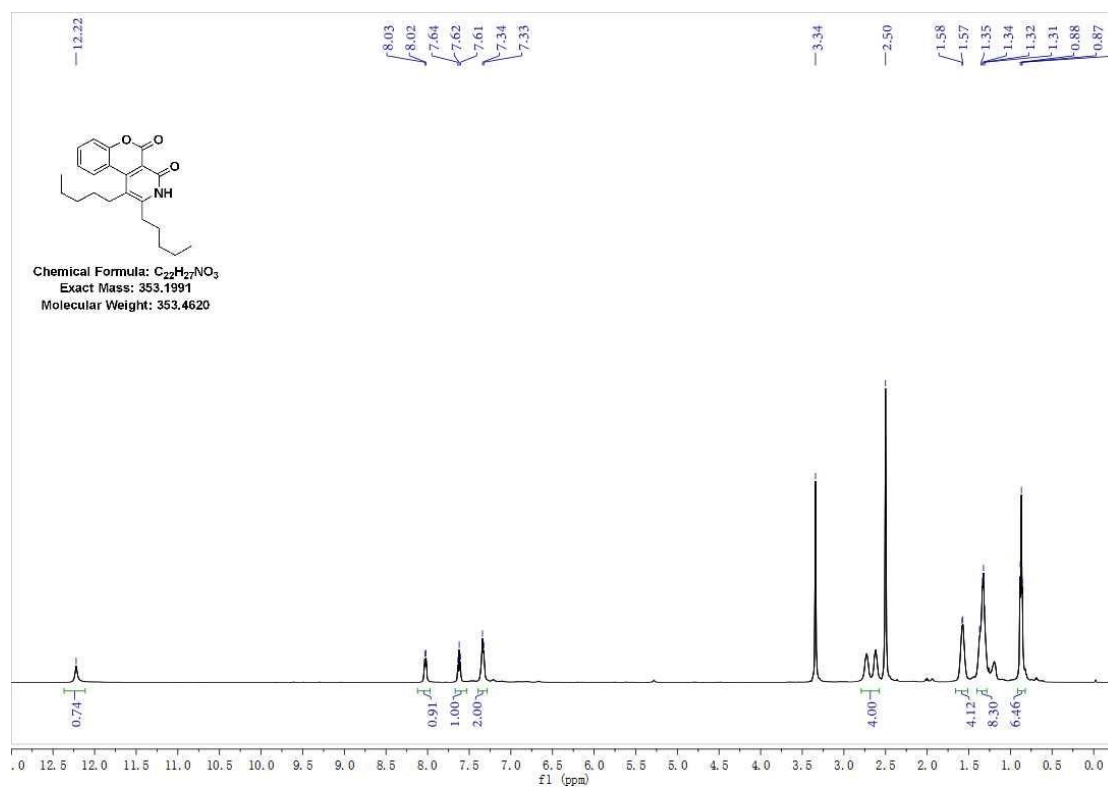

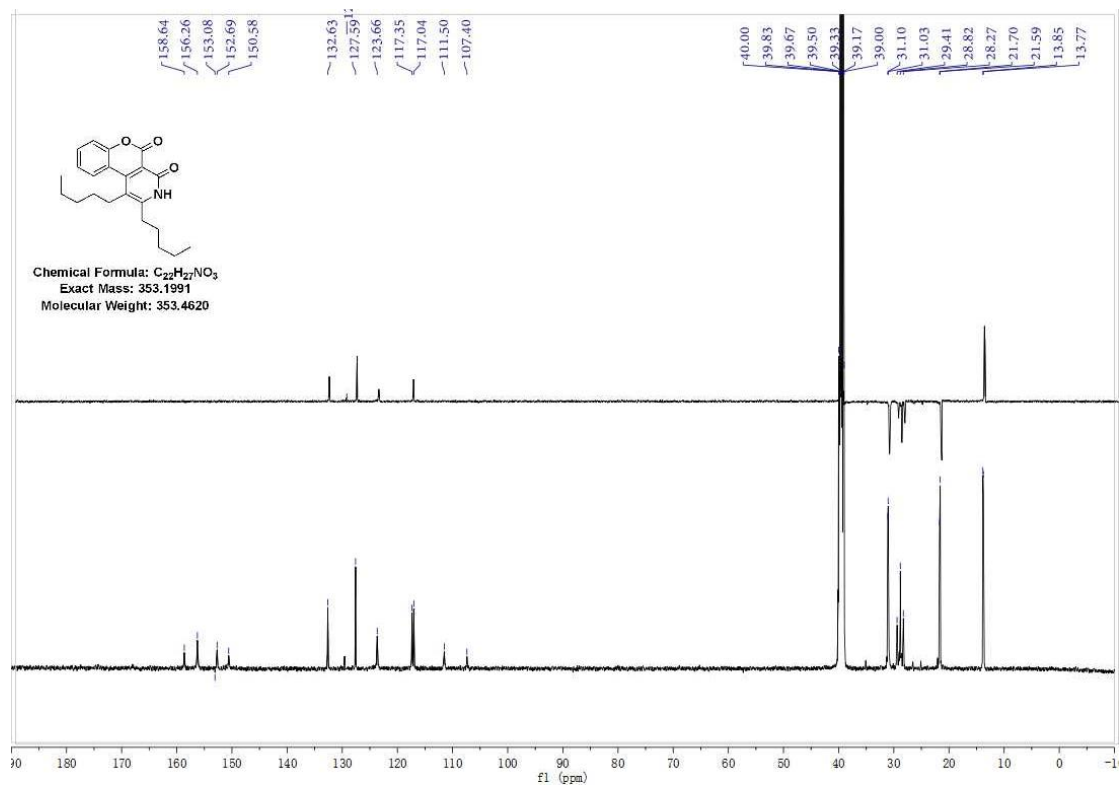

User Spectra

Fragmentor Voltage: 170  
 Collision Energy: 0  
 Ionization Mode: ESI

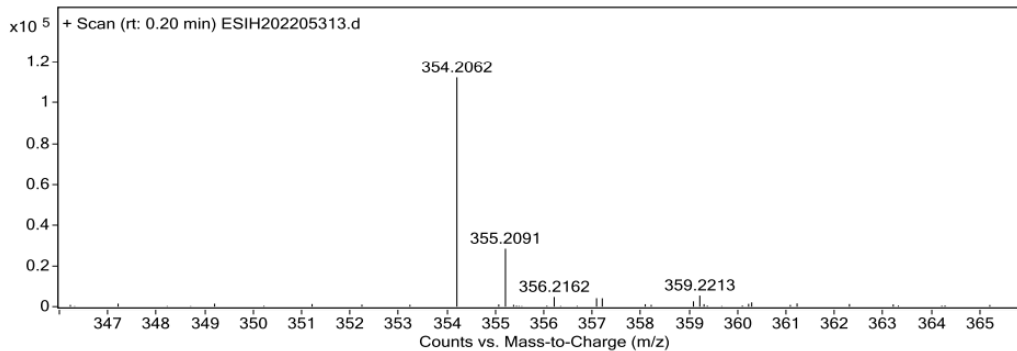

Formula Calculator Results

| m/z      | Calc m/z | Diff (mDa) | Diff (ppm) | Ion Formula  | Ion                |
|----------|----------|------------|------------|--------------|--------------------|
| 354.2062 | 354.2064 | 0.12       | 0.35       | C22 H28 N O3 | (M+H) <sup>+</sup> |

*1,2-Dibutyl-9-methyl-4H-chromeno[3,4-c]pyridine-4,5(3H)-dione (3bh)*

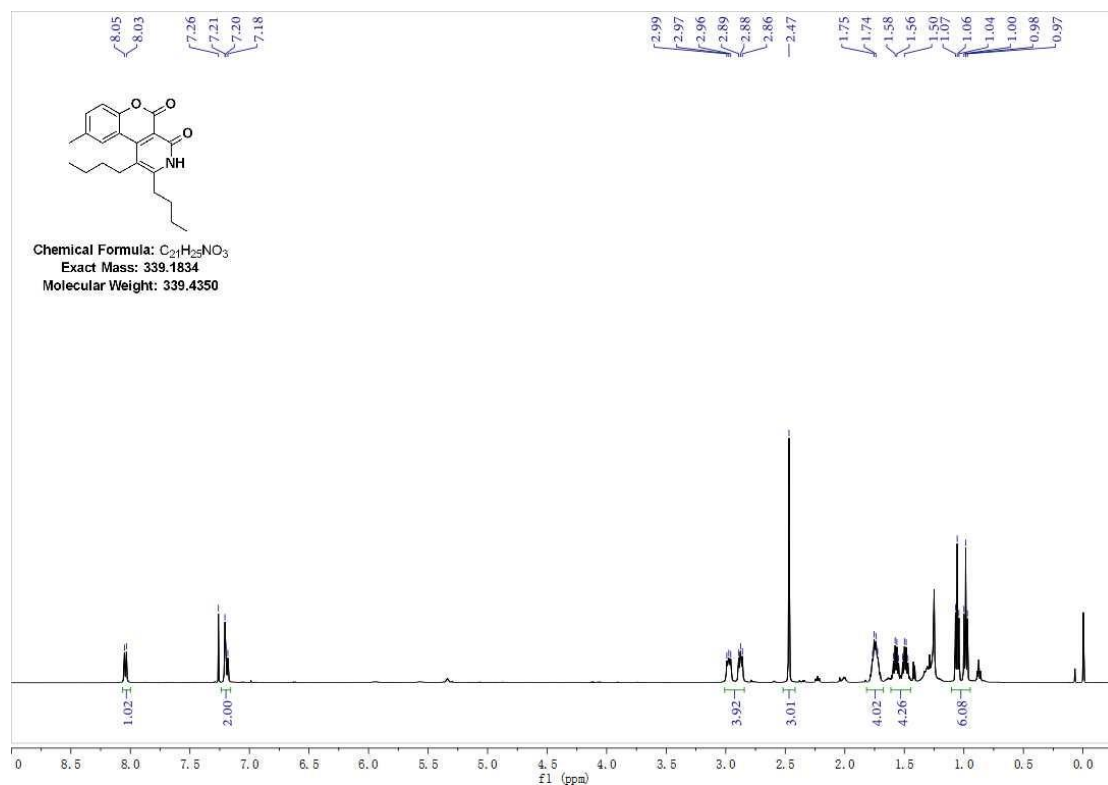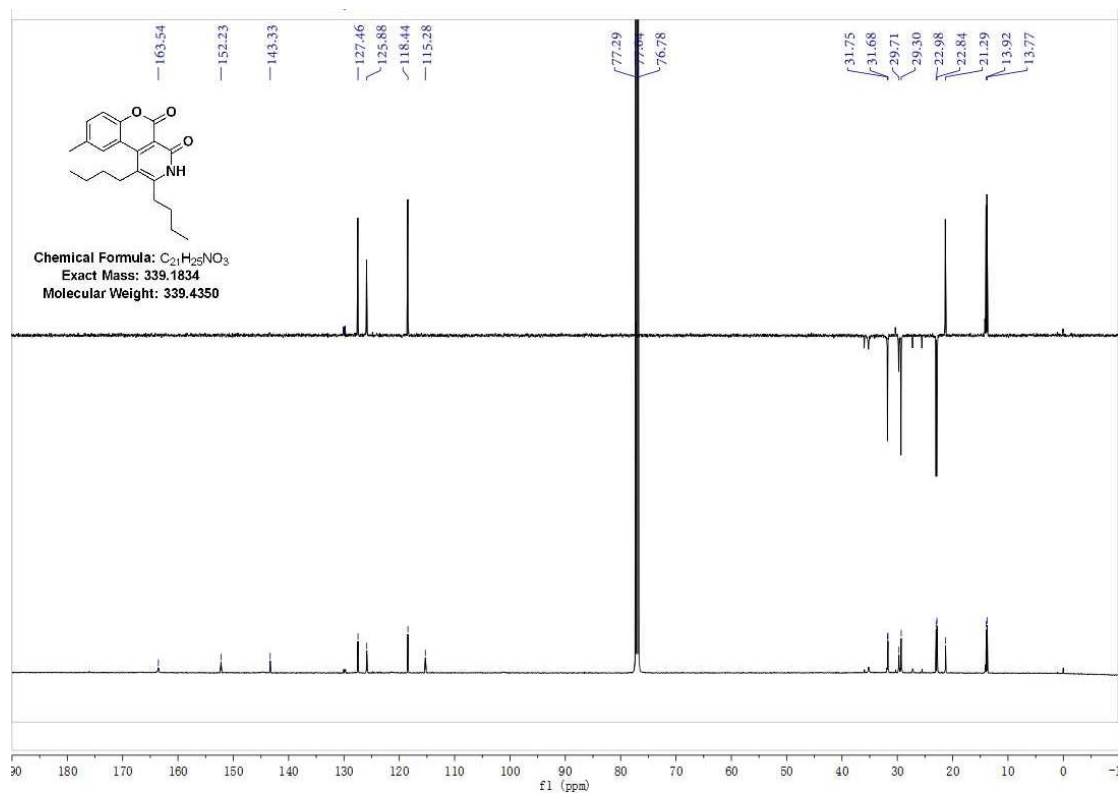

User Spectra

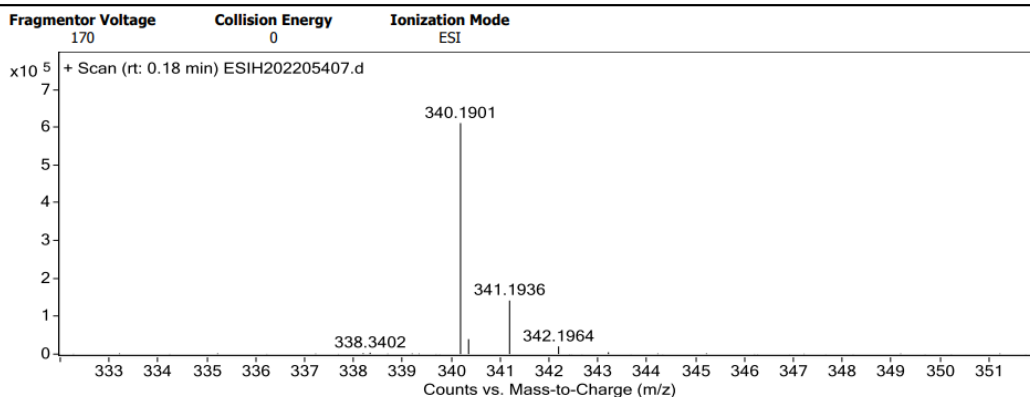

Formula Calculator Results

| m/z      | Calc m/z | Diff (mDa) | Diff (ppm) | Ion Formula                                      | Ion                |
|----------|----------|------------|------------|--------------------------------------------------|--------------------|
| 340.1901 | 340.1907 | 0.65       | 1.9        | C <sub>21</sub> H <sub>26</sub> N O <sub>3</sub> | (M+H) <sup>+</sup> |

1,2-Dibutyl-9-fluoro-4H-chromeno[3,4-c]pyridine-4,5(3H)-dione (3dh)

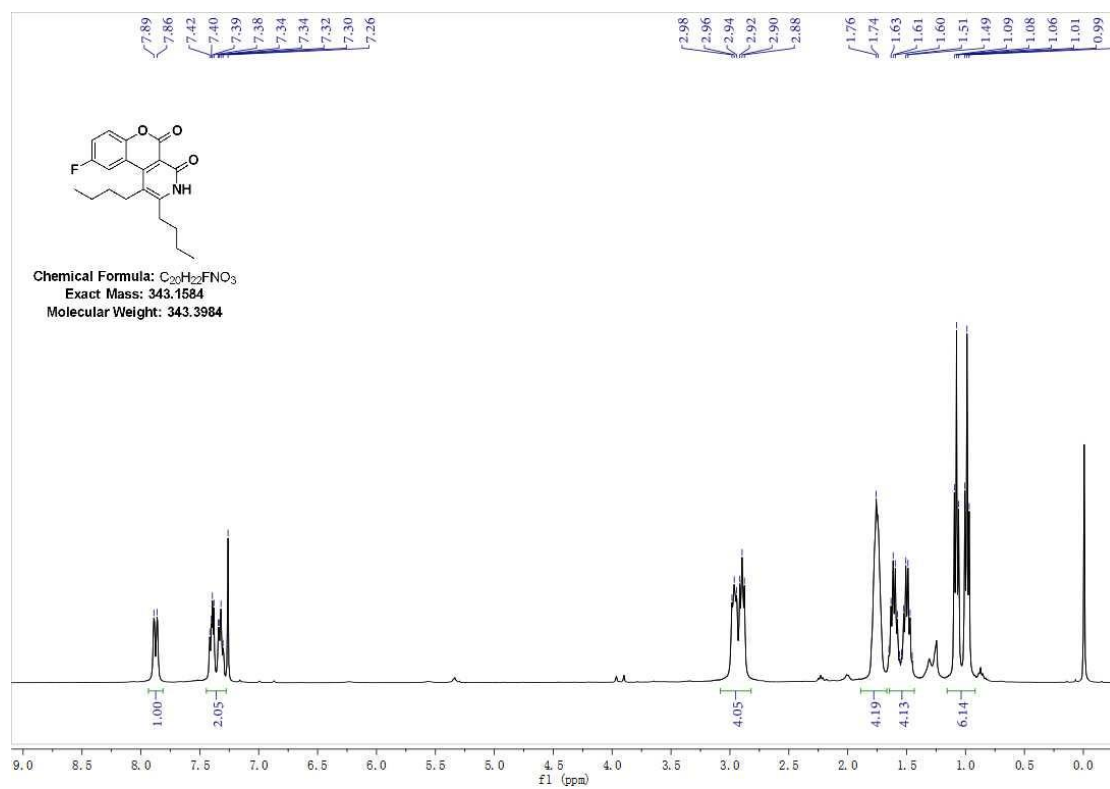

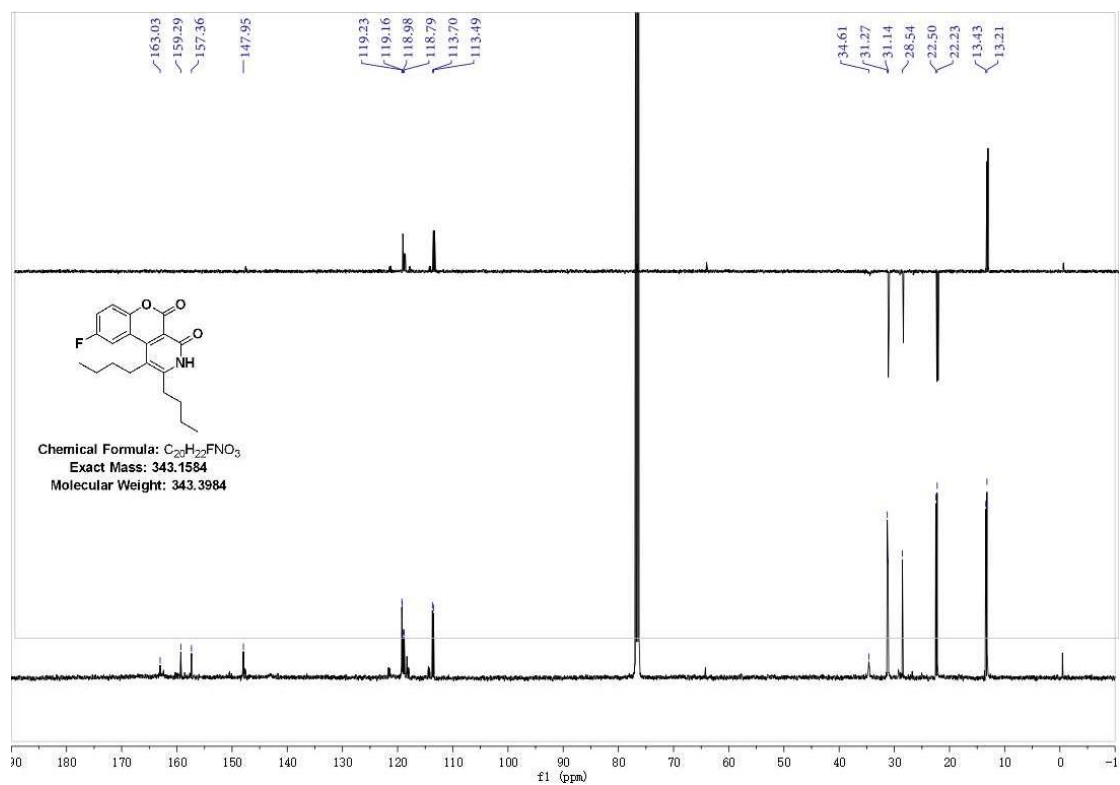

User Spectra

Fragmentor Voltage: 170  
 Collision Energy: 0  
 Ionization Mode: ESI

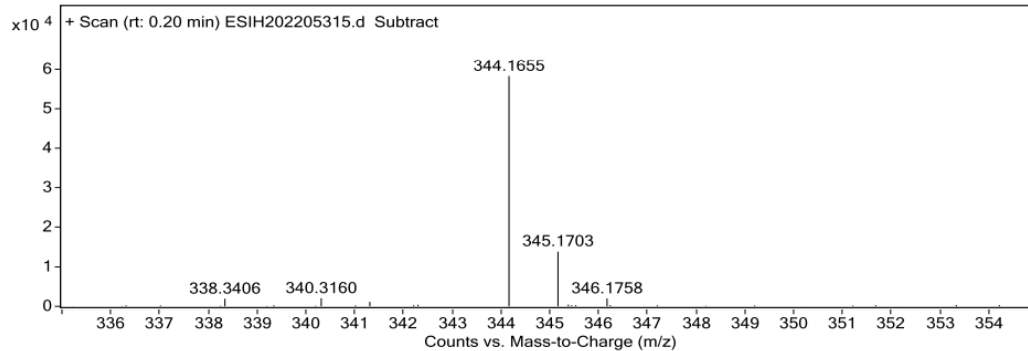

Formula Calculator Results

| m/z      | Calc m/z | Diff (mDa) | Diff (ppm) | Ion Formula                                        | Ion                |
|----------|----------|------------|------------|----------------------------------------------------|--------------------|
| 344.1655 | 344.1656 | 0.16       | 0.47       | C <sub>20</sub> H <sub>23</sub> F N O <sub>3</sub> | (M+H) <sup>+</sup> |



9-Fluoro-1,2-dipentyl-4H-chromeno[3,4-c]pyridine-4,5(3H)-dione (**3di**)

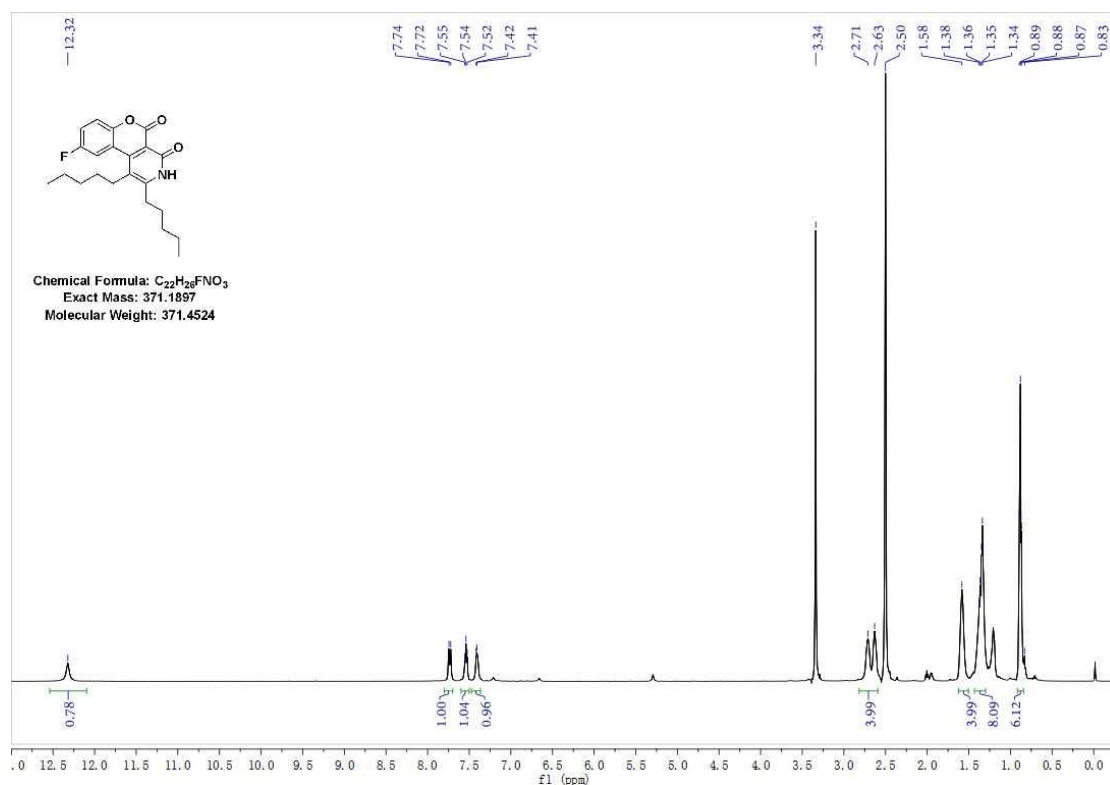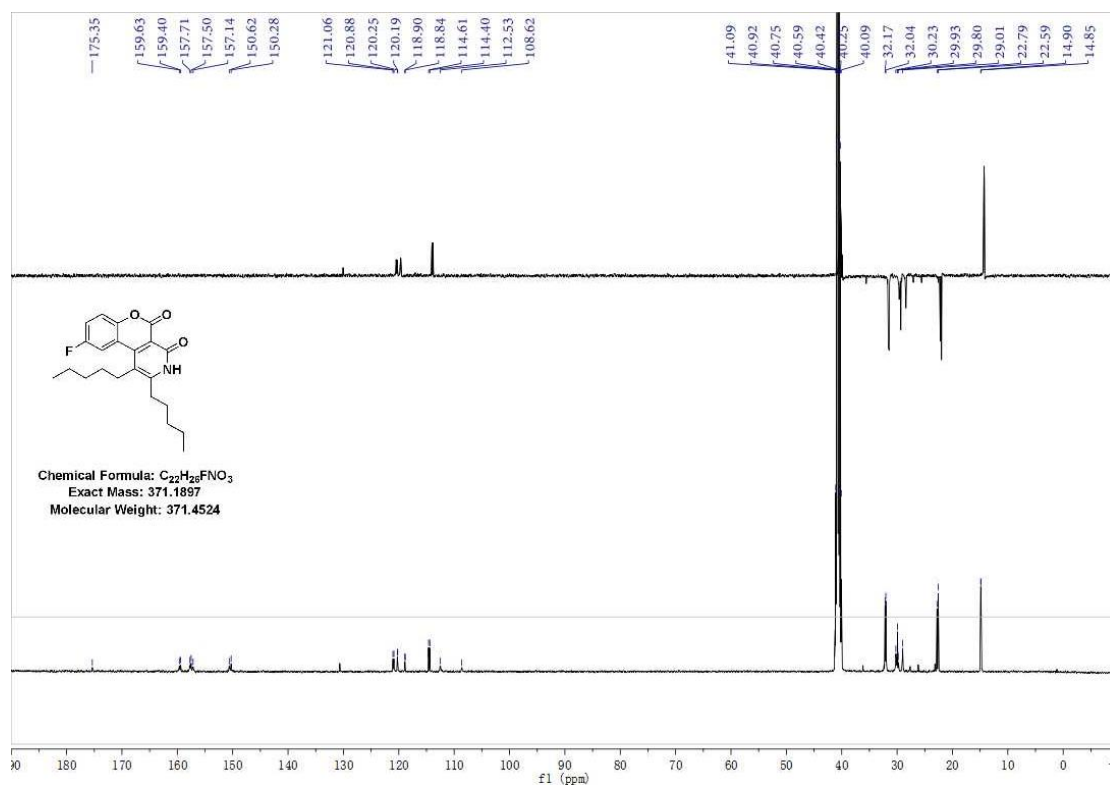

User Spectra

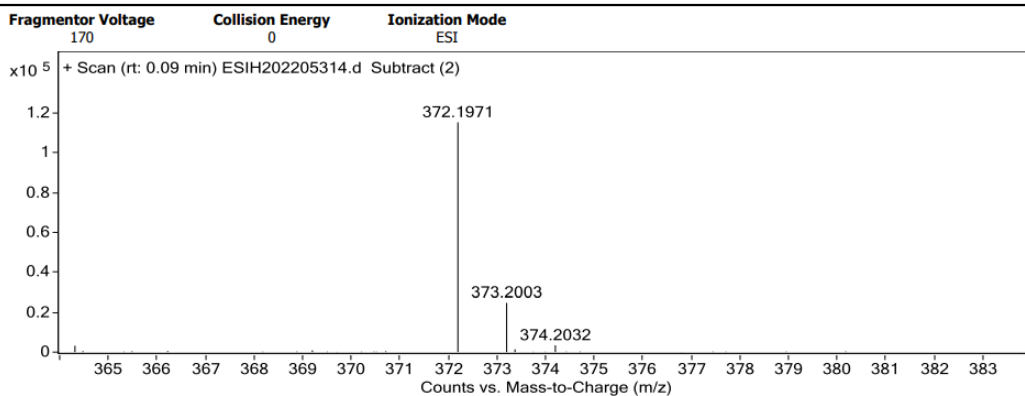

Formula Calculator Results

| m/z      | Calc m/z | Diff (mDa) | Diff (ppm) | Ion Formula    | Ion    |
|----------|----------|------------|------------|----------------|--------|
| 372.1971 | 372.1969 | -0.17      | -0.47      | C22 H27 F N O3 | (M+H)+ |

1,2-Dibutyl-9-chloro-4H-chromeno[3,4-c]pyridine-4,5(3H)-dione (3eh)

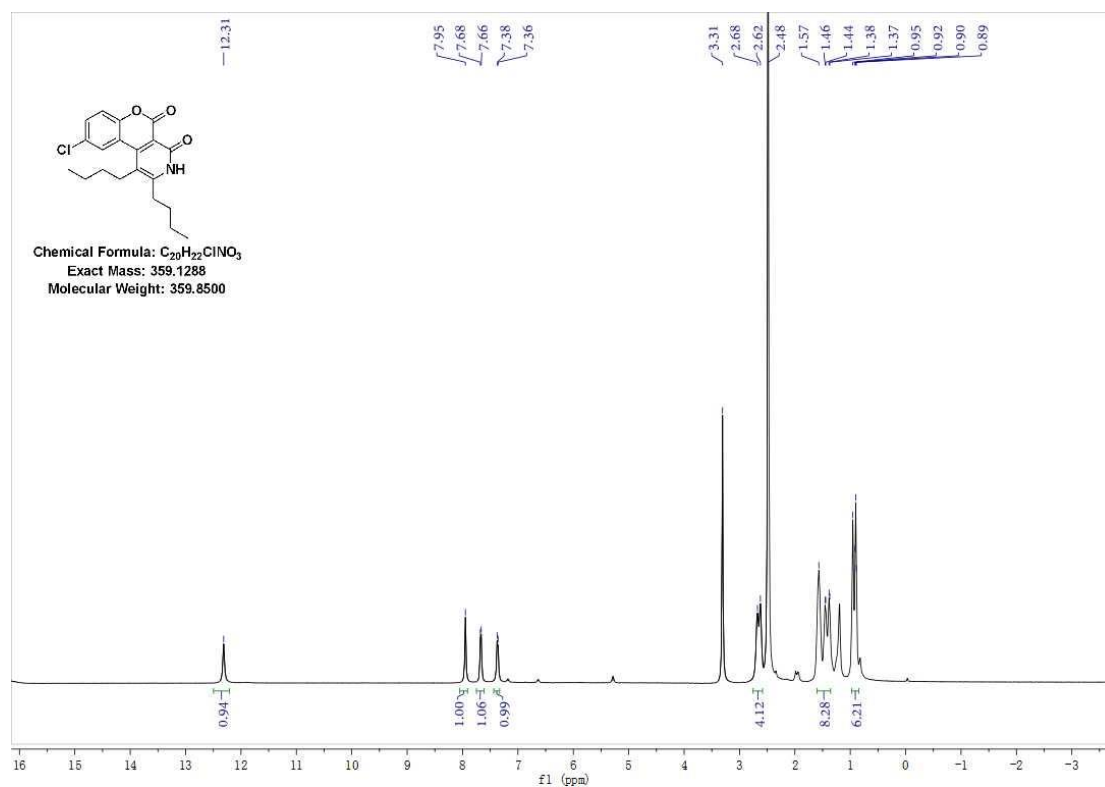

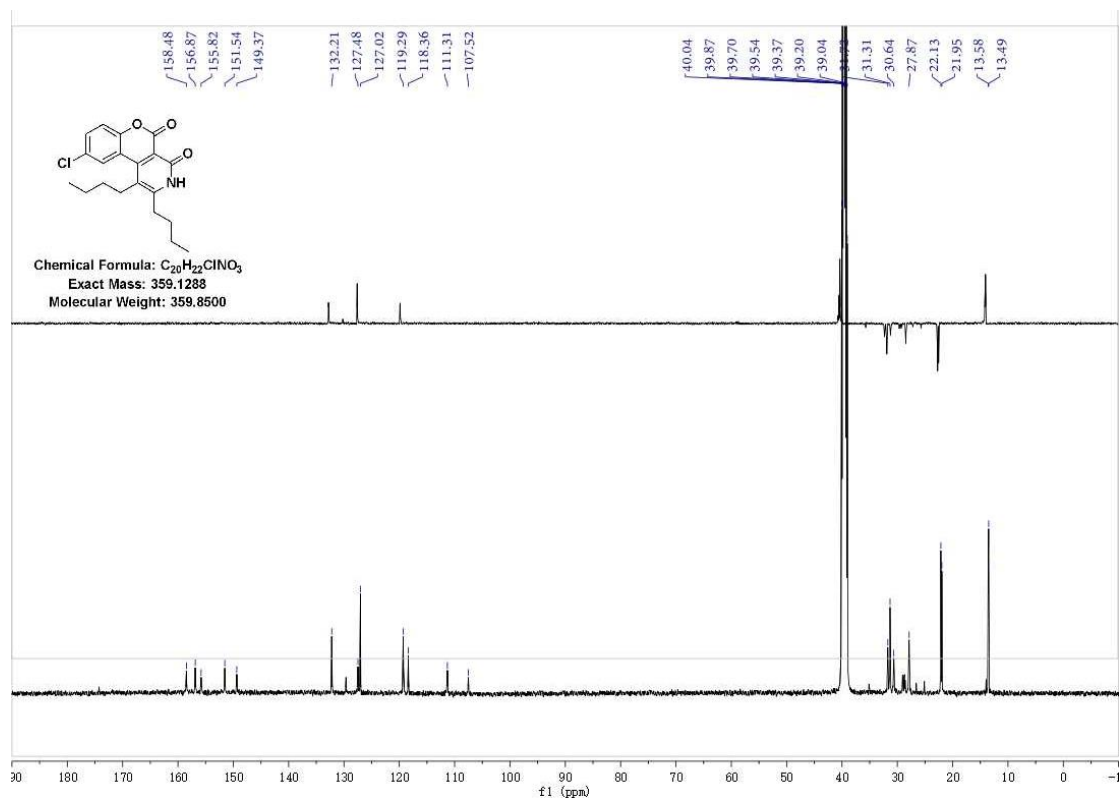

User Spectra

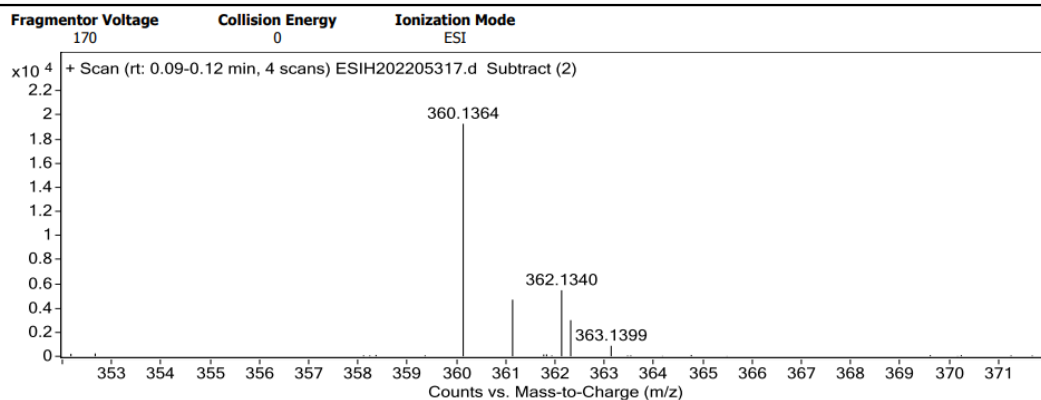

Formula Calculator Results

| m/z      | Calc m/z | Diff (mDa) | Diff (ppm) | Ion Formula                                         | Ion                |
|----------|----------|------------|------------|-----------------------------------------------------|--------------------|
| 360.1364 | 360.1361 | -0.25      | -0.71      | C <sub>20</sub> H <sub>23</sub> Cl N O <sub>3</sub> | (M+H) <sup>+</sup> |

10,15-Dimethyl-9-phenyl-6*H*,7*H*-chromeno[4',3':4,5]pyrido[2,1-*a*]isoquinoline-6,7-dione (3aj)

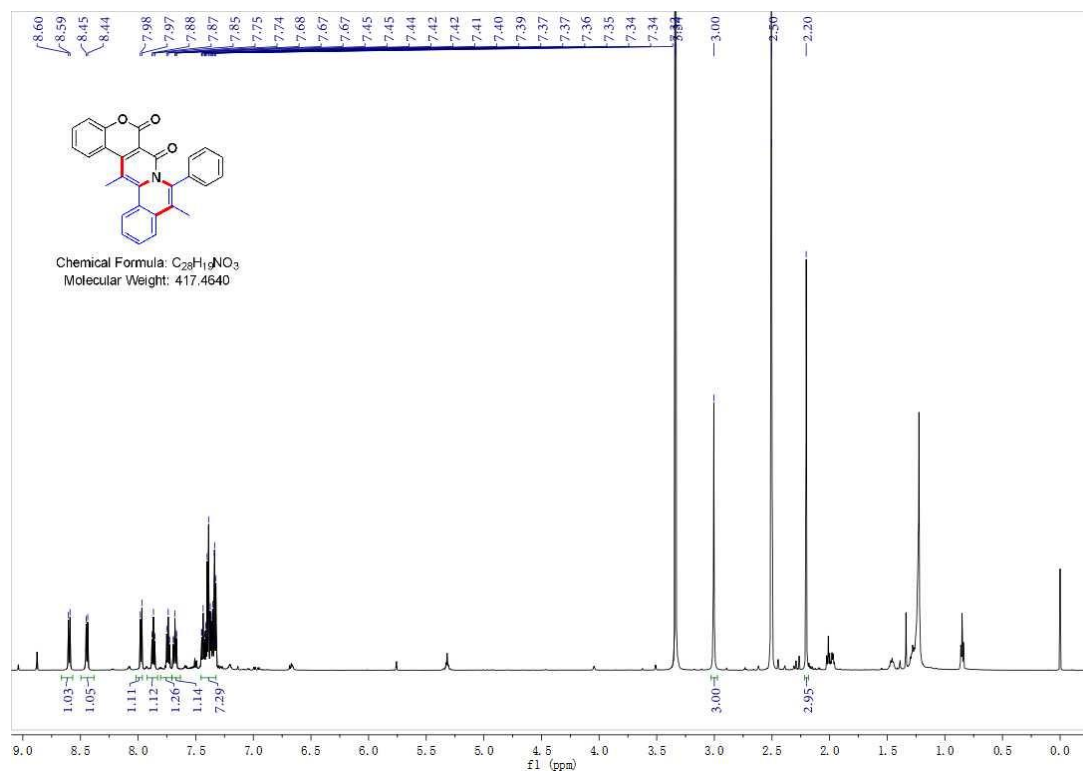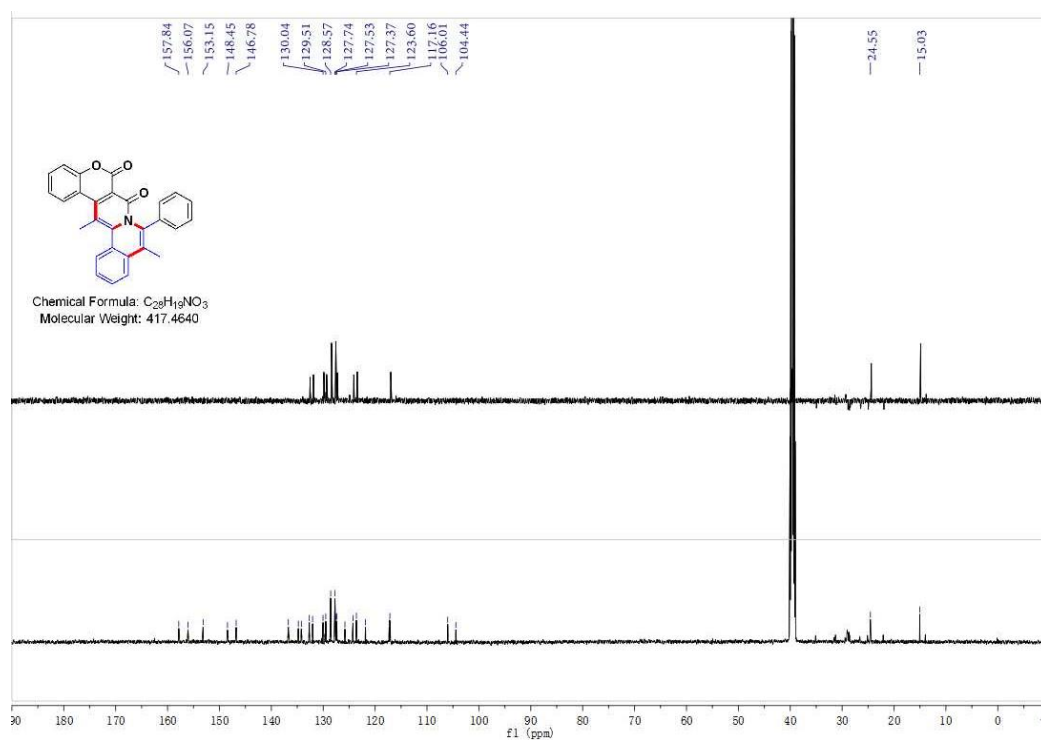

User Spectra

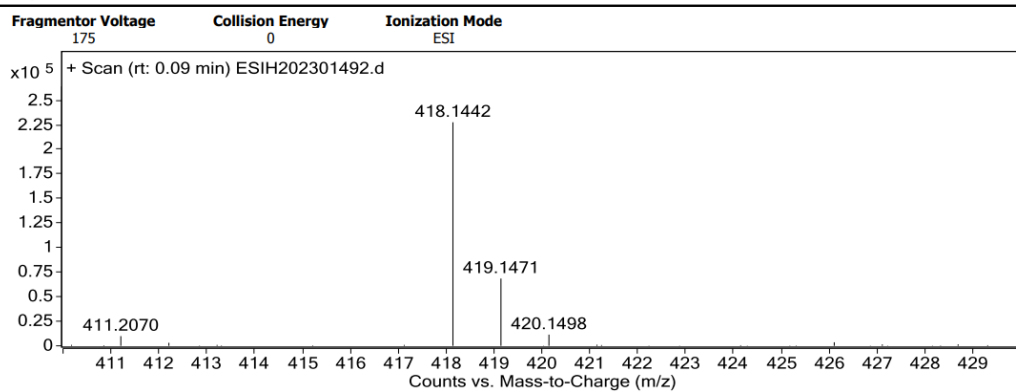

Formula Calculator Results

| m/z      | Calc m/z | Diff (mDa) | Diff (ppm) | Ion Formula  | Ion    |
|----------|----------|------------|------------|--------------|--------|
| 418.1442 | 418.1438 | -0.4       | -0.95      | C28 H20 N O3 | (M+H)+ |

Diethyl 4,5-dioxo-3,5-dihydro-4*H*-chromeno[3,4-*c*]pyridine-1,2-dicarboxylate (**3ak**)

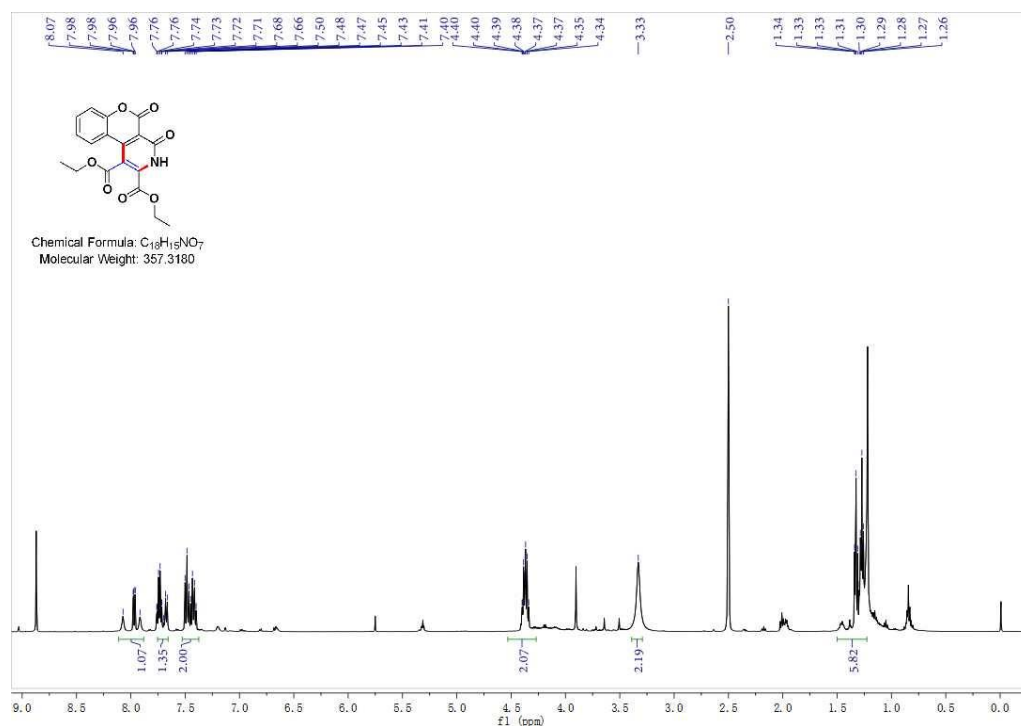

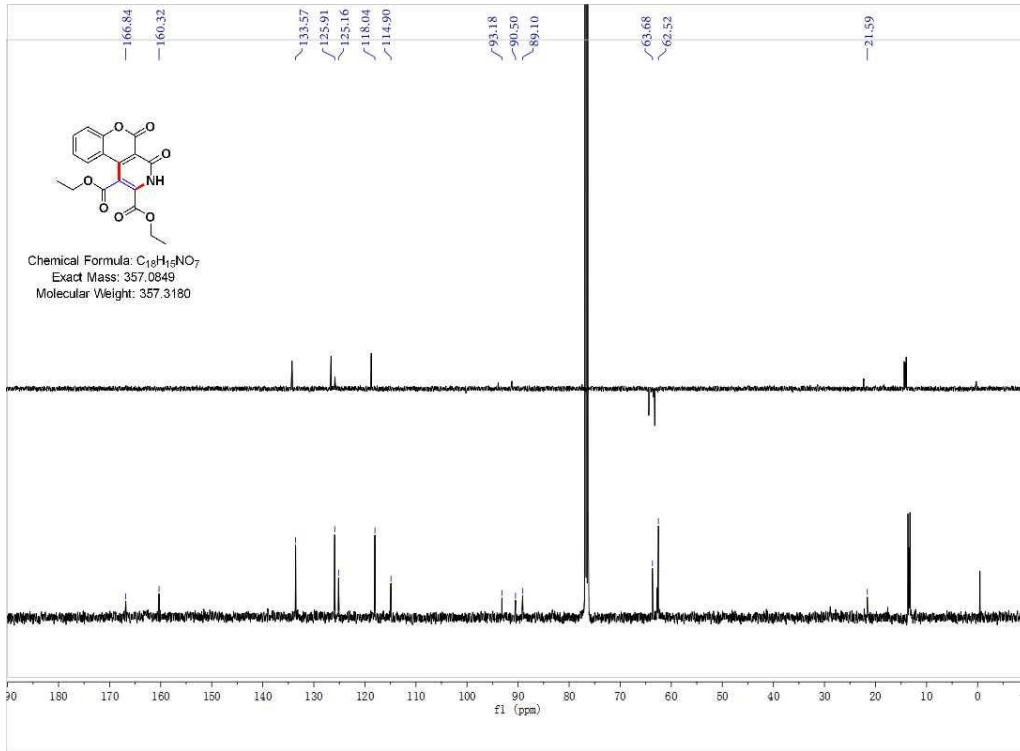

**User Spectra**

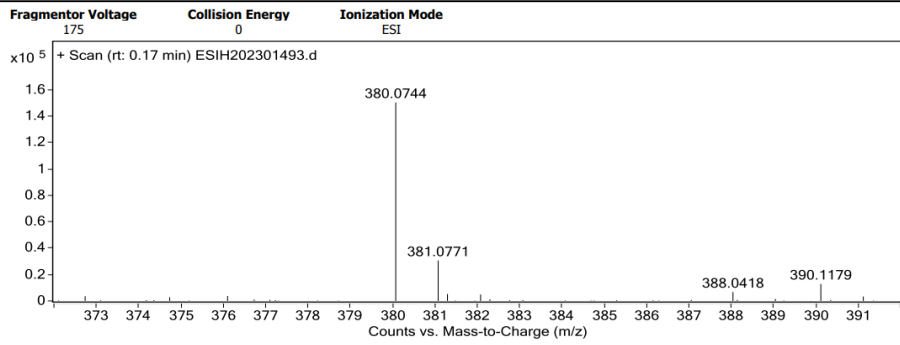

**Formula Calculator Results**

| m/z      | Calc m/z | Diff (mDa) | Diff (ppm) | Ion Formula                                         | Ion                 |
|----------|----------|------------|------------|-----------------------------------------------------|---------------------|
| 380.0744 | 380.0741 | -0.3       | -0.78      | C <sub>18</sub> H <sub>15</sub> N Na O <sub>7</sub> | (M+Na) <sup>+</sup> |

# 1,2-Diphenyl-4*H*-chromeno[3,4-*c*]pyridine-4,5(3*H*)-dione (VI)

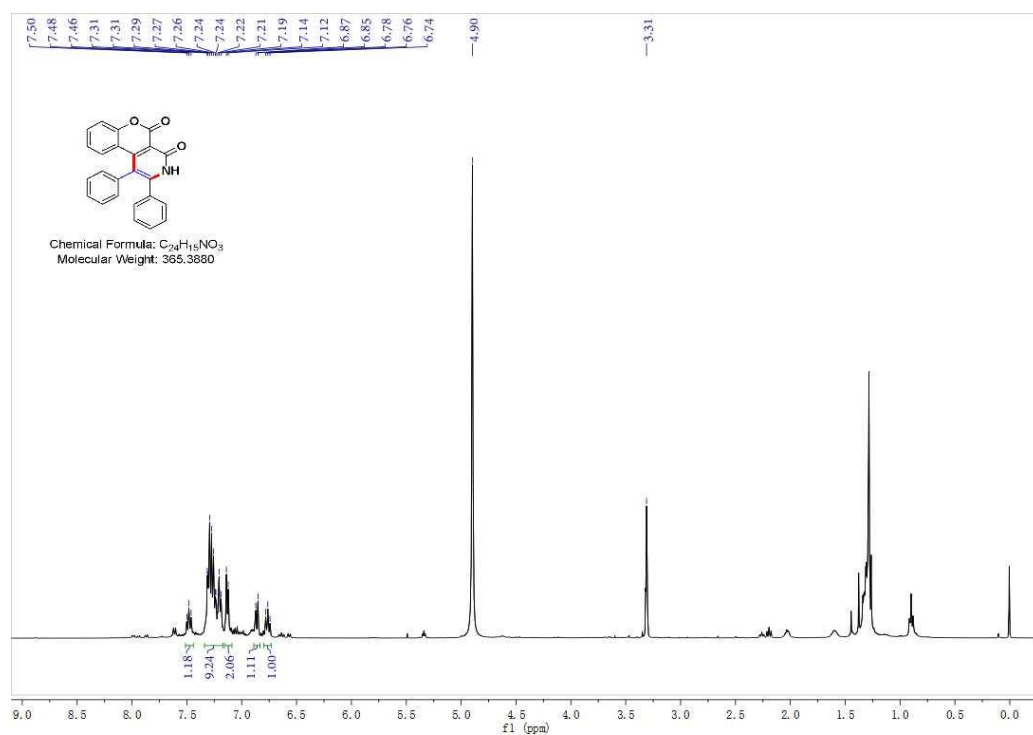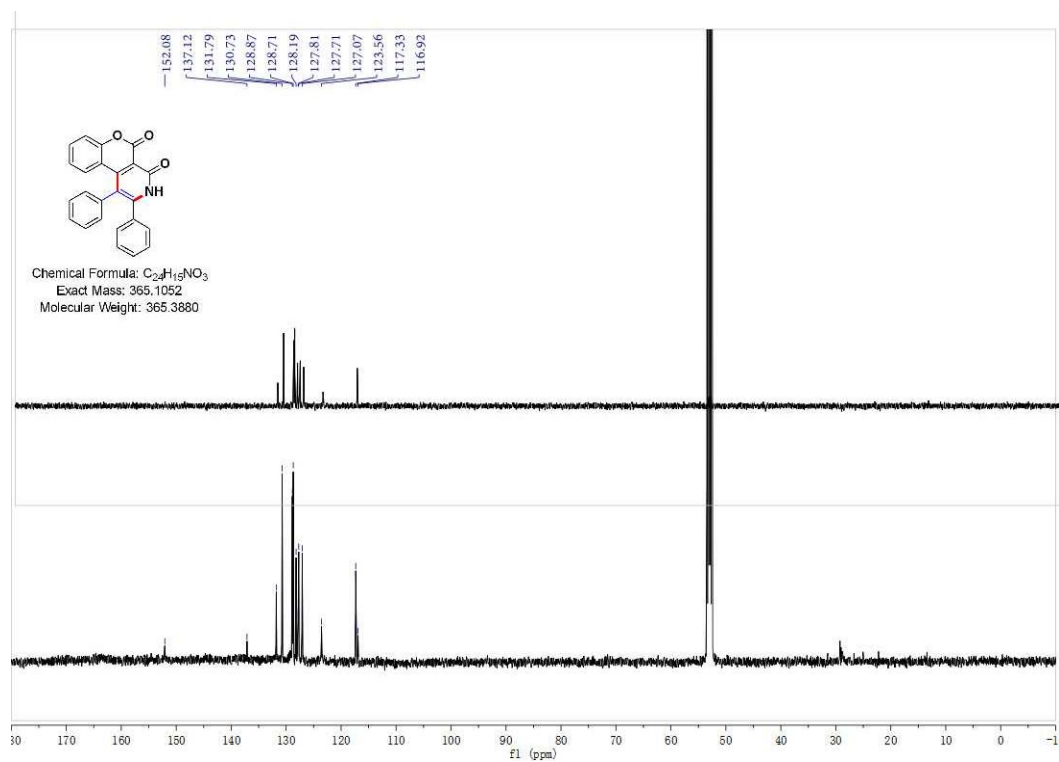

User Spectra

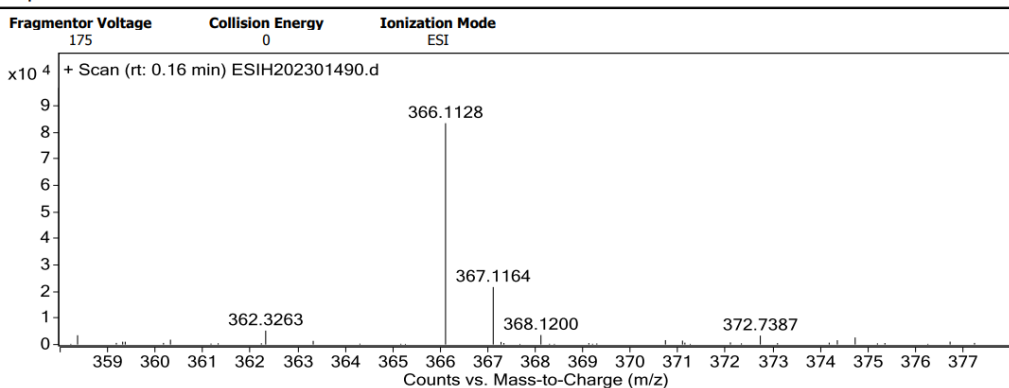

Formula Calculator Results

| m/z      | Calc m/z | Diff (mDa) | Diff (ppm) | Ion Formula                                      | Ion                |
|----------|----------|------------|------------|--------------------------------------------------|--------------------|
| 366.1128 | 366.1125 | -0.3       | -0.81      | C <sub>24</sub> H <sub>16</sub> N O <sub>3</sub> | (M+H) <sup>+</sup> |

12-(3,4-Diphenylisoquinolin-1-yl)-7-hydroxy-6H-naphtho[2,3-c]chromen-6-one (4a)

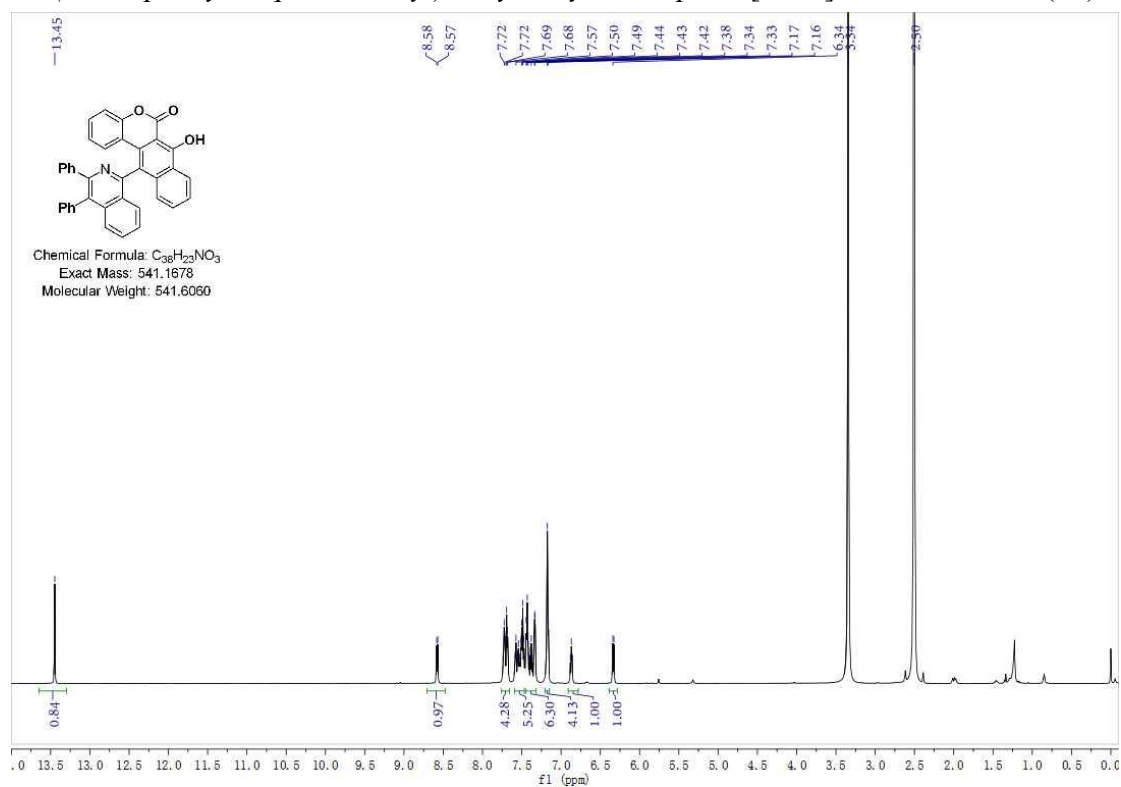



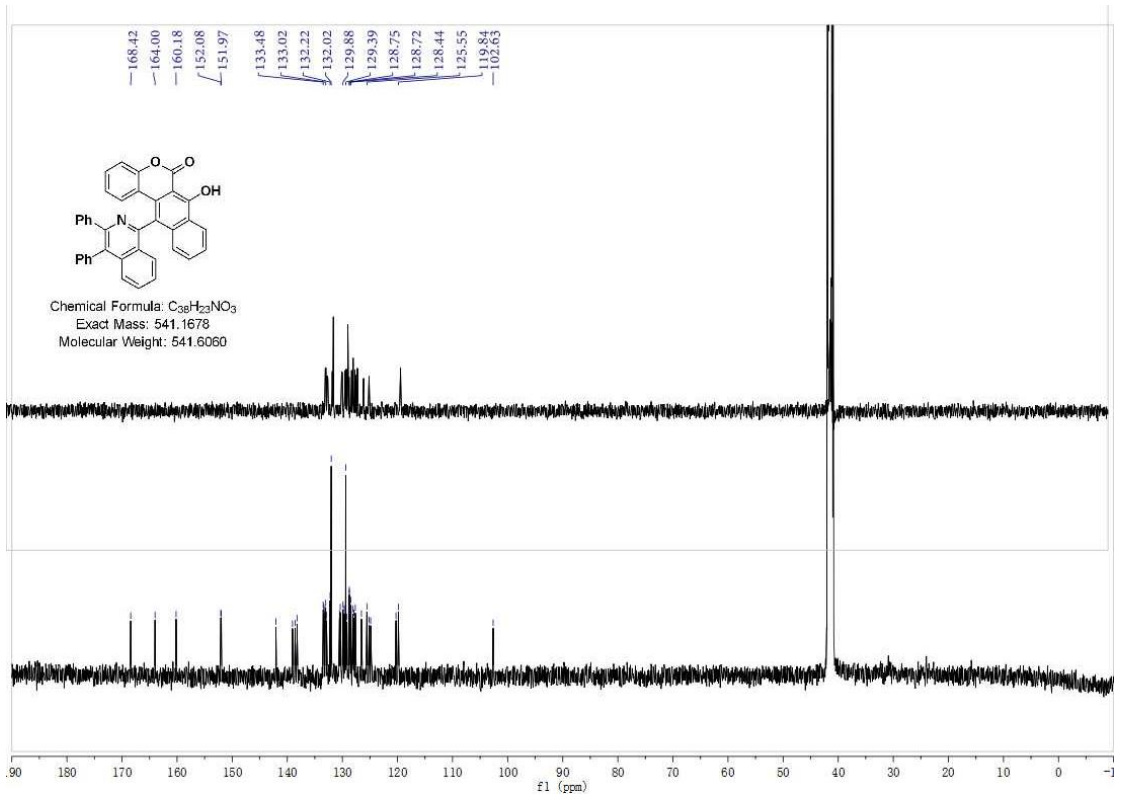

**User Spectra**

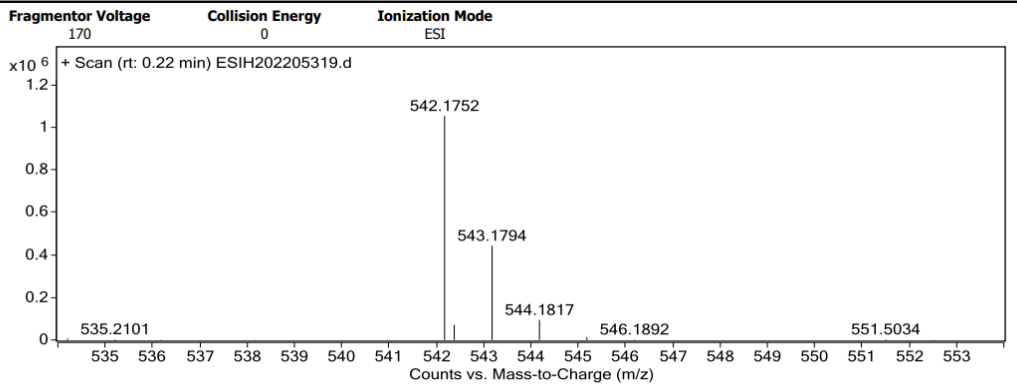

**Formula Calculator Results**

| m/z      | Calc m/z | Diff (mDa) | Diff (ppm) | Ion Formula                                      | Ion                |
|----------|----------|------------|------------|--------------------------------------------------|--------------------|
| 542.1752 | 542.1751 | -0.12      | -0.22      | C <sub>38</sub> H <sub>24</sub> N O <sub>3</sub> | (M+H) <sup>+</sup> |

12-(3,4-diphenylisoquinolin-1-yl)-7-hydroxy-3-methyl-6H-naphtho[2,3-c]chromen-6-one (4b)

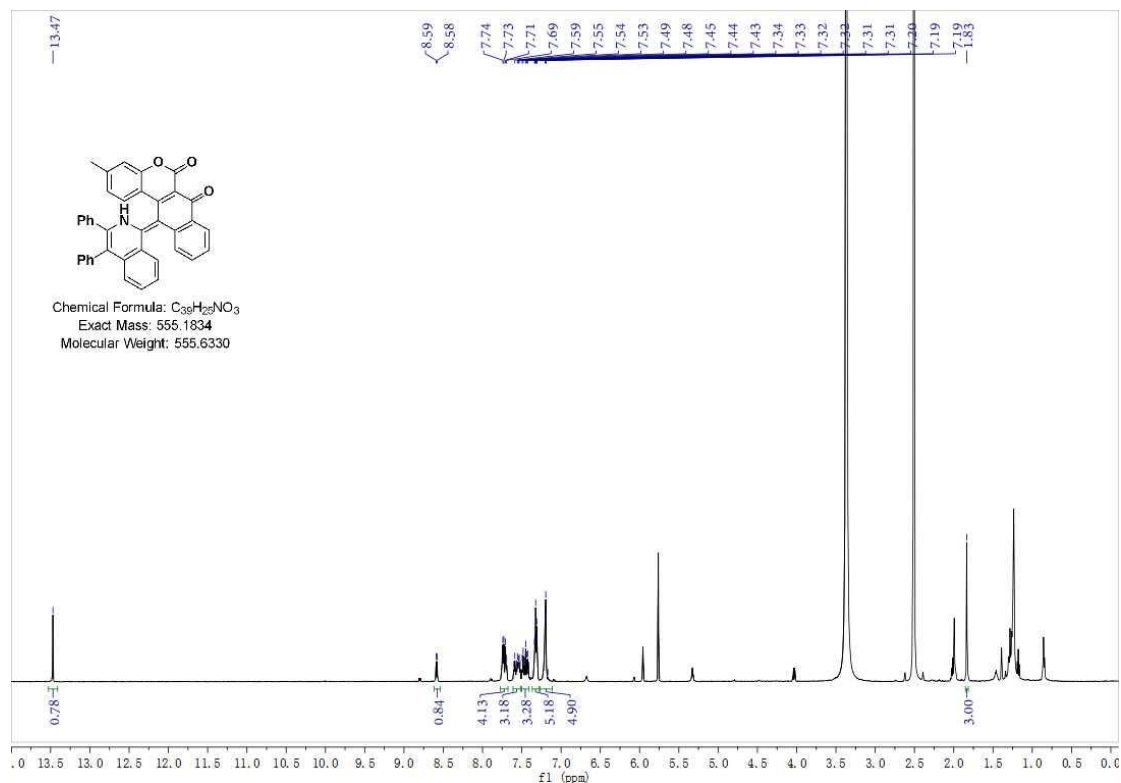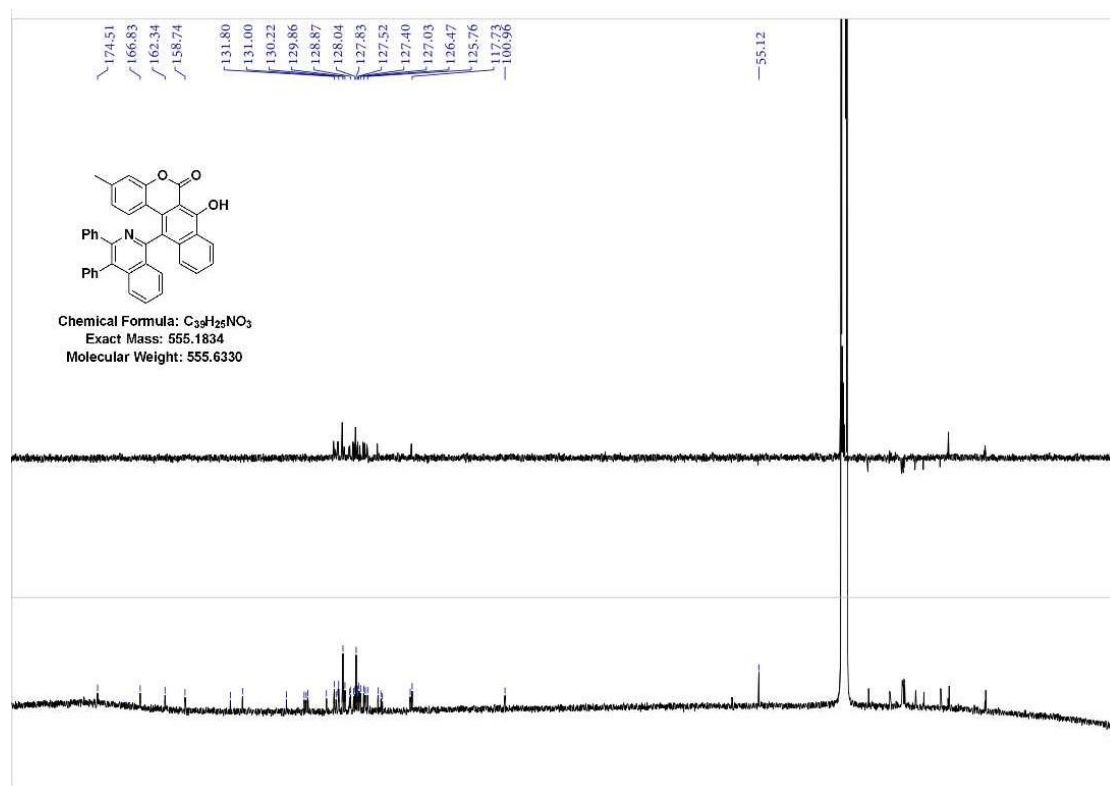

User Spectra

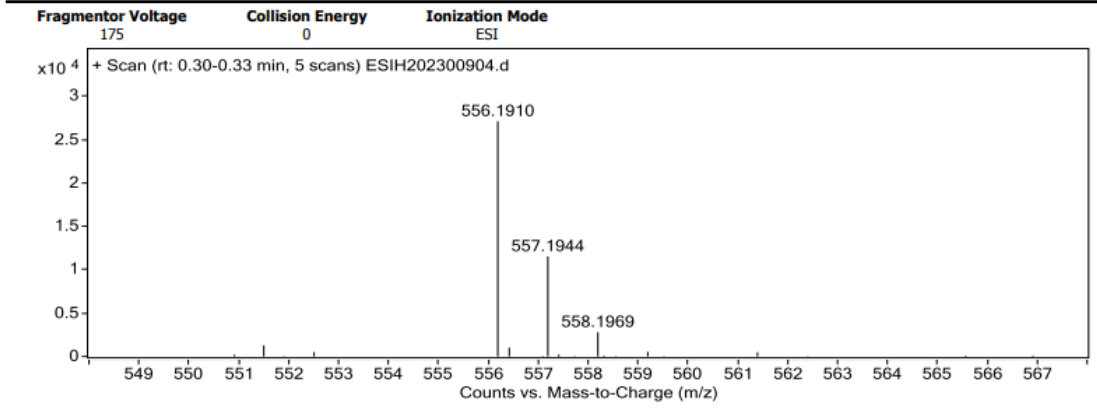

Formula Calculator Results

| m/z     | Calc m/z | Diff (mDa) | Diff (ppm) | Ion Formula                                      | Ion                |
|---------|----------|------------|------------|--------------------------------------------------|--------------------|
| 556.191 | 556.1907 | -0.27      | -0.48      | C <sub>39</sub> H <sub>26</sub> N O <sub>3</sub> | (M+H) <sup>+</sup> |

1,2-Dibutyl-3,4-dihydro-5H-chromeno[3,4-c]pyridin-5-one (5)

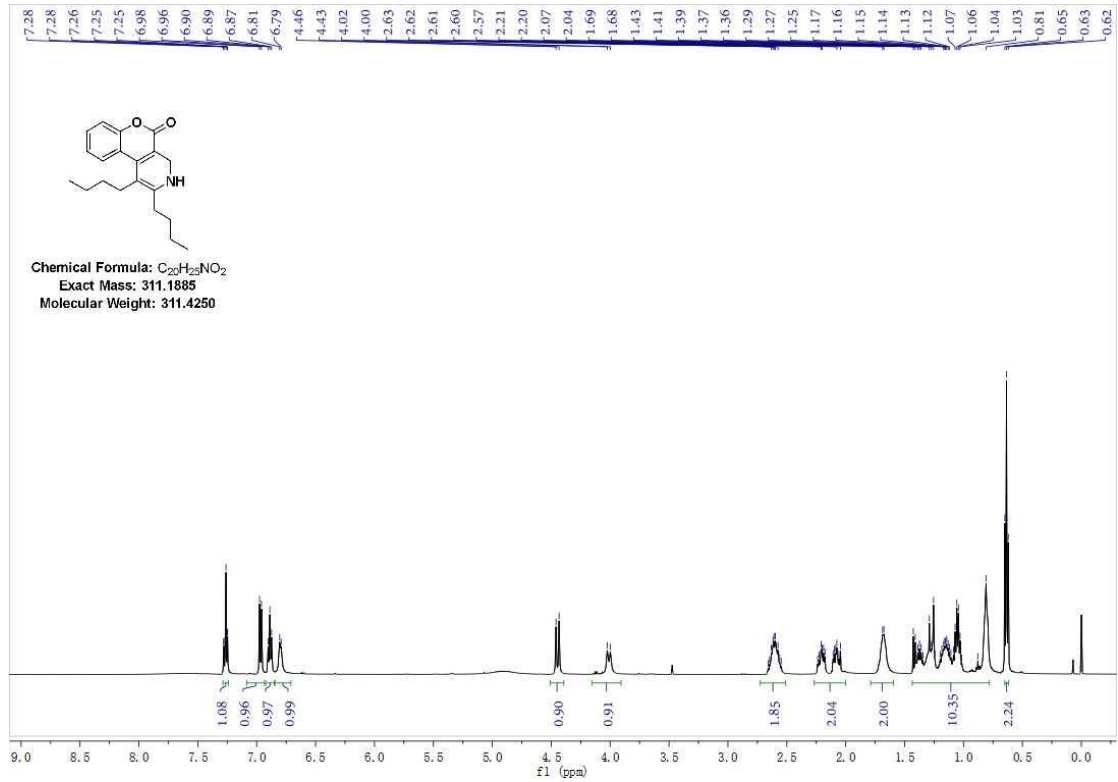

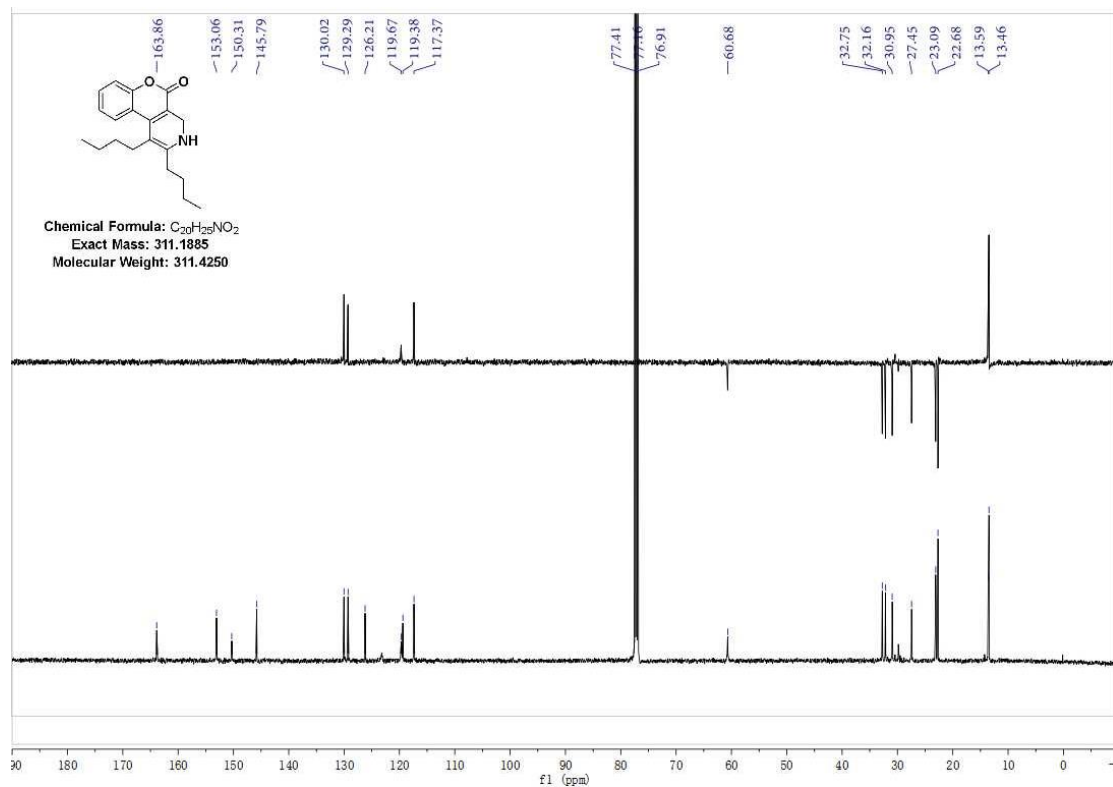

**User Spectra**

Fragmentor Voltage 170      Collision Energy 0      Ionization Mode ESI

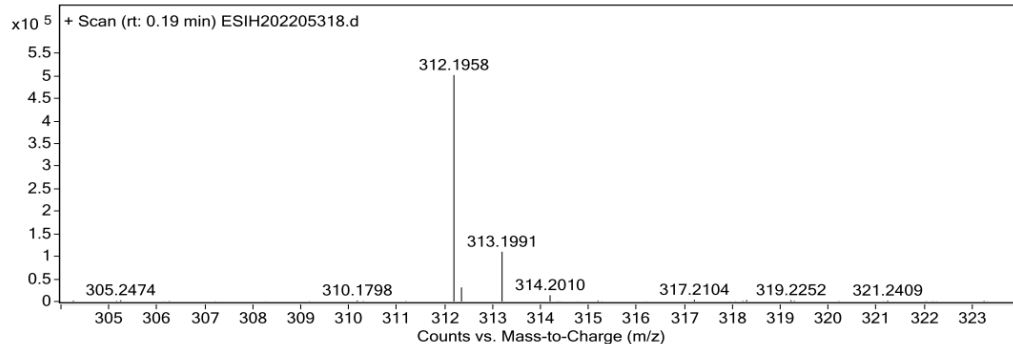

**Formula Calculator Results**

| m/z      | Calc m/z | Diff (mDa) | Diff (ppm) | Ion Formula                                      | Ion                |
|----------|----------|------------|------------|--------------------------------------------------|--------------------|
| 312.1958 | 312.1958 | 0.02       | 0.05       | C <sub>20</sub> H <sub>26</sub> N O <sub>2</sub> | (M+H) <sup>+</sup> |
