# Supplementary figures and images for: A Ru(ii)-catalyzed C–H activation and annulation cascade for the construction of highly coumarin-fused benzo[a]quinolizin-4-ones and pyridin-2-ones
Source: Royal Society of Chemistry journal article supplement (doi:10.1039/d3qo00255a), 2023-01-01

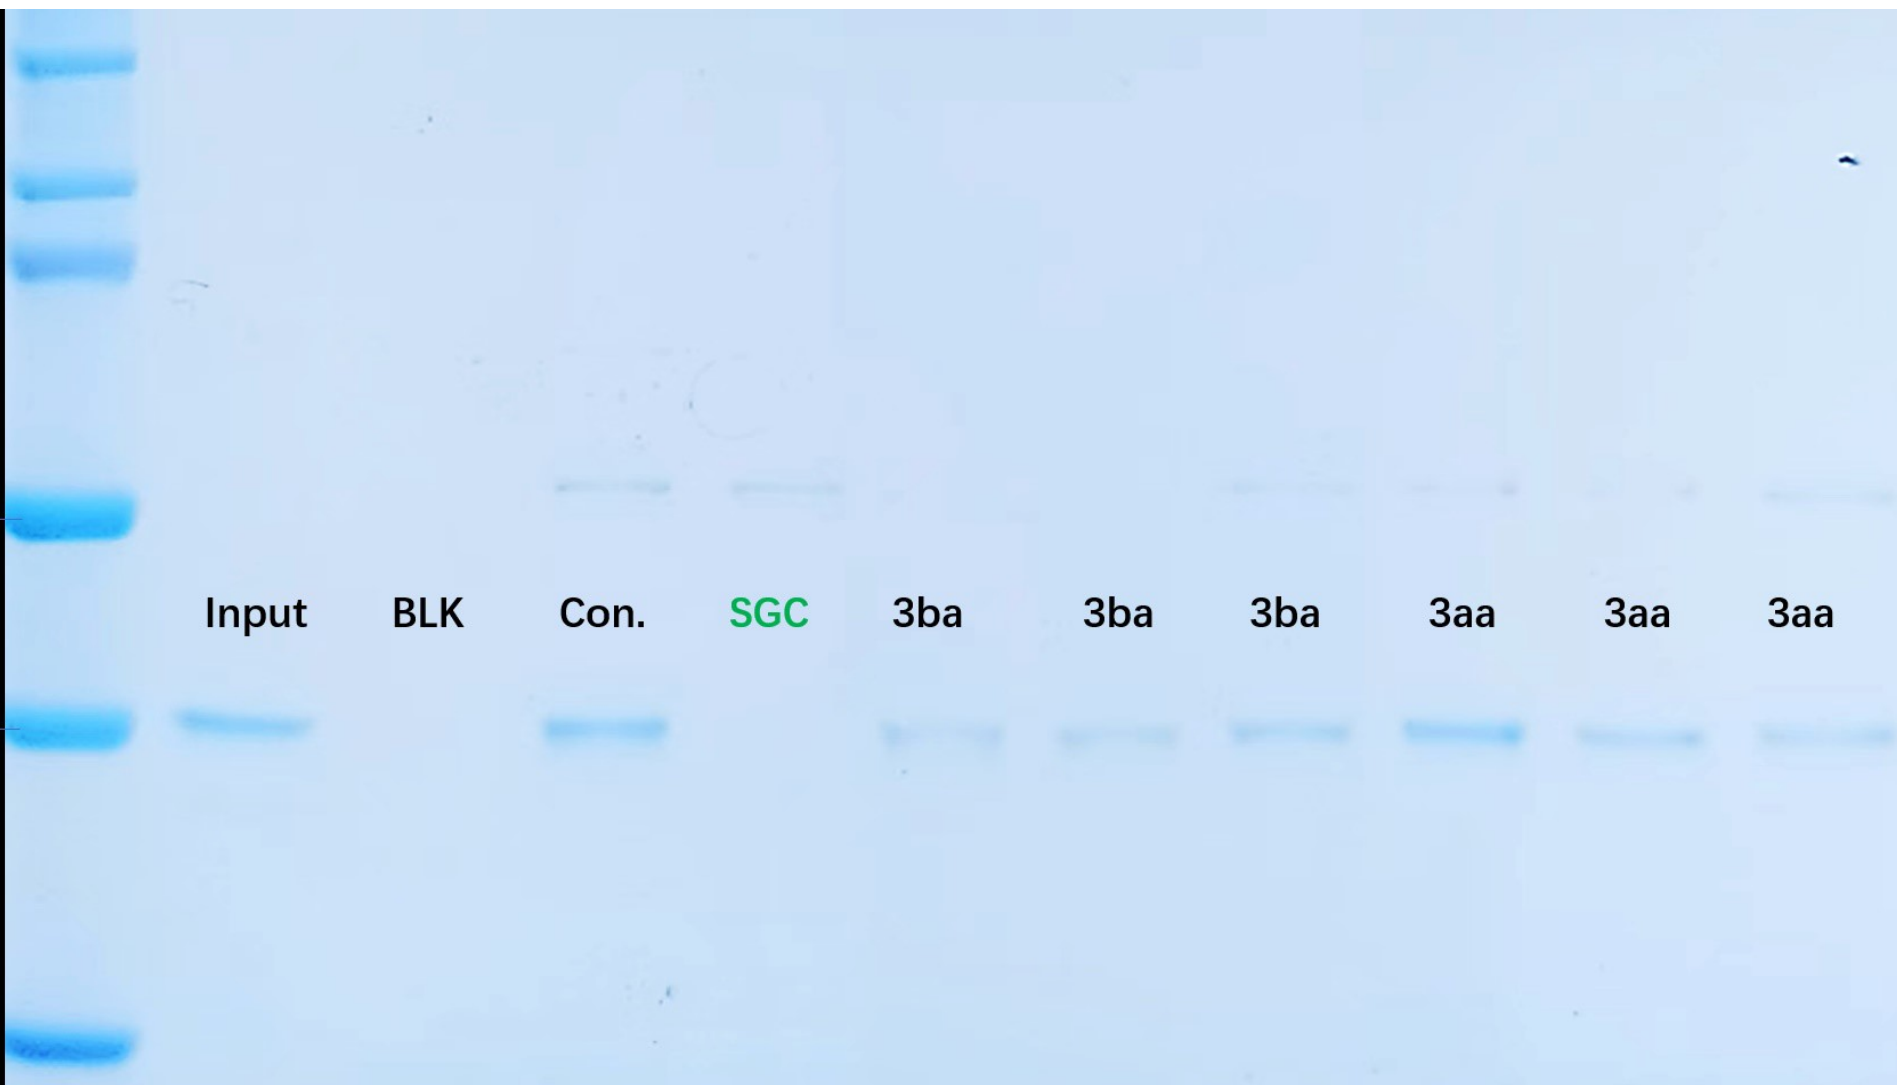

Supplement: d3qo00255a2.pdf [file d3qo00255a2.pdf]

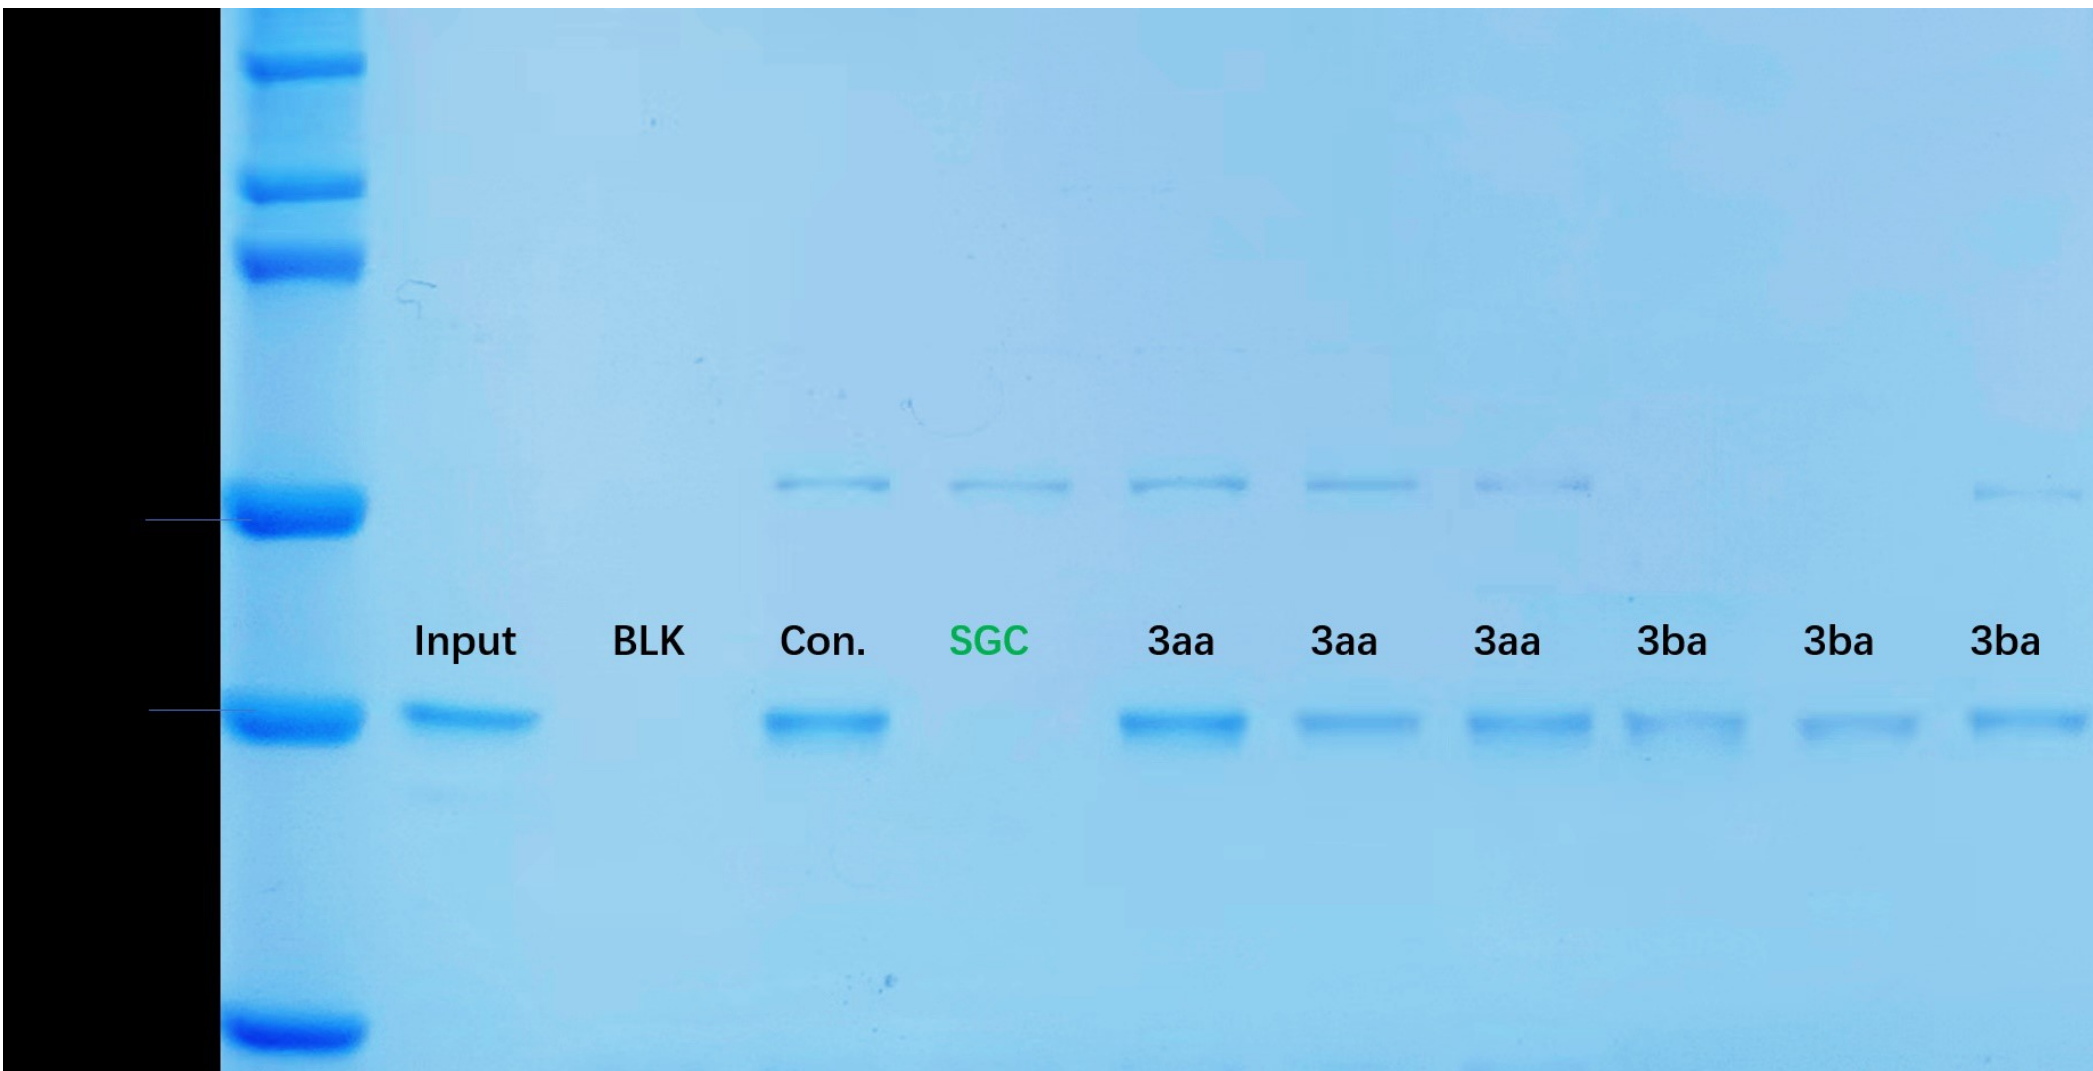

Supplement: d3qo00255a3.pdf [file d3qo00255a3.pdf]

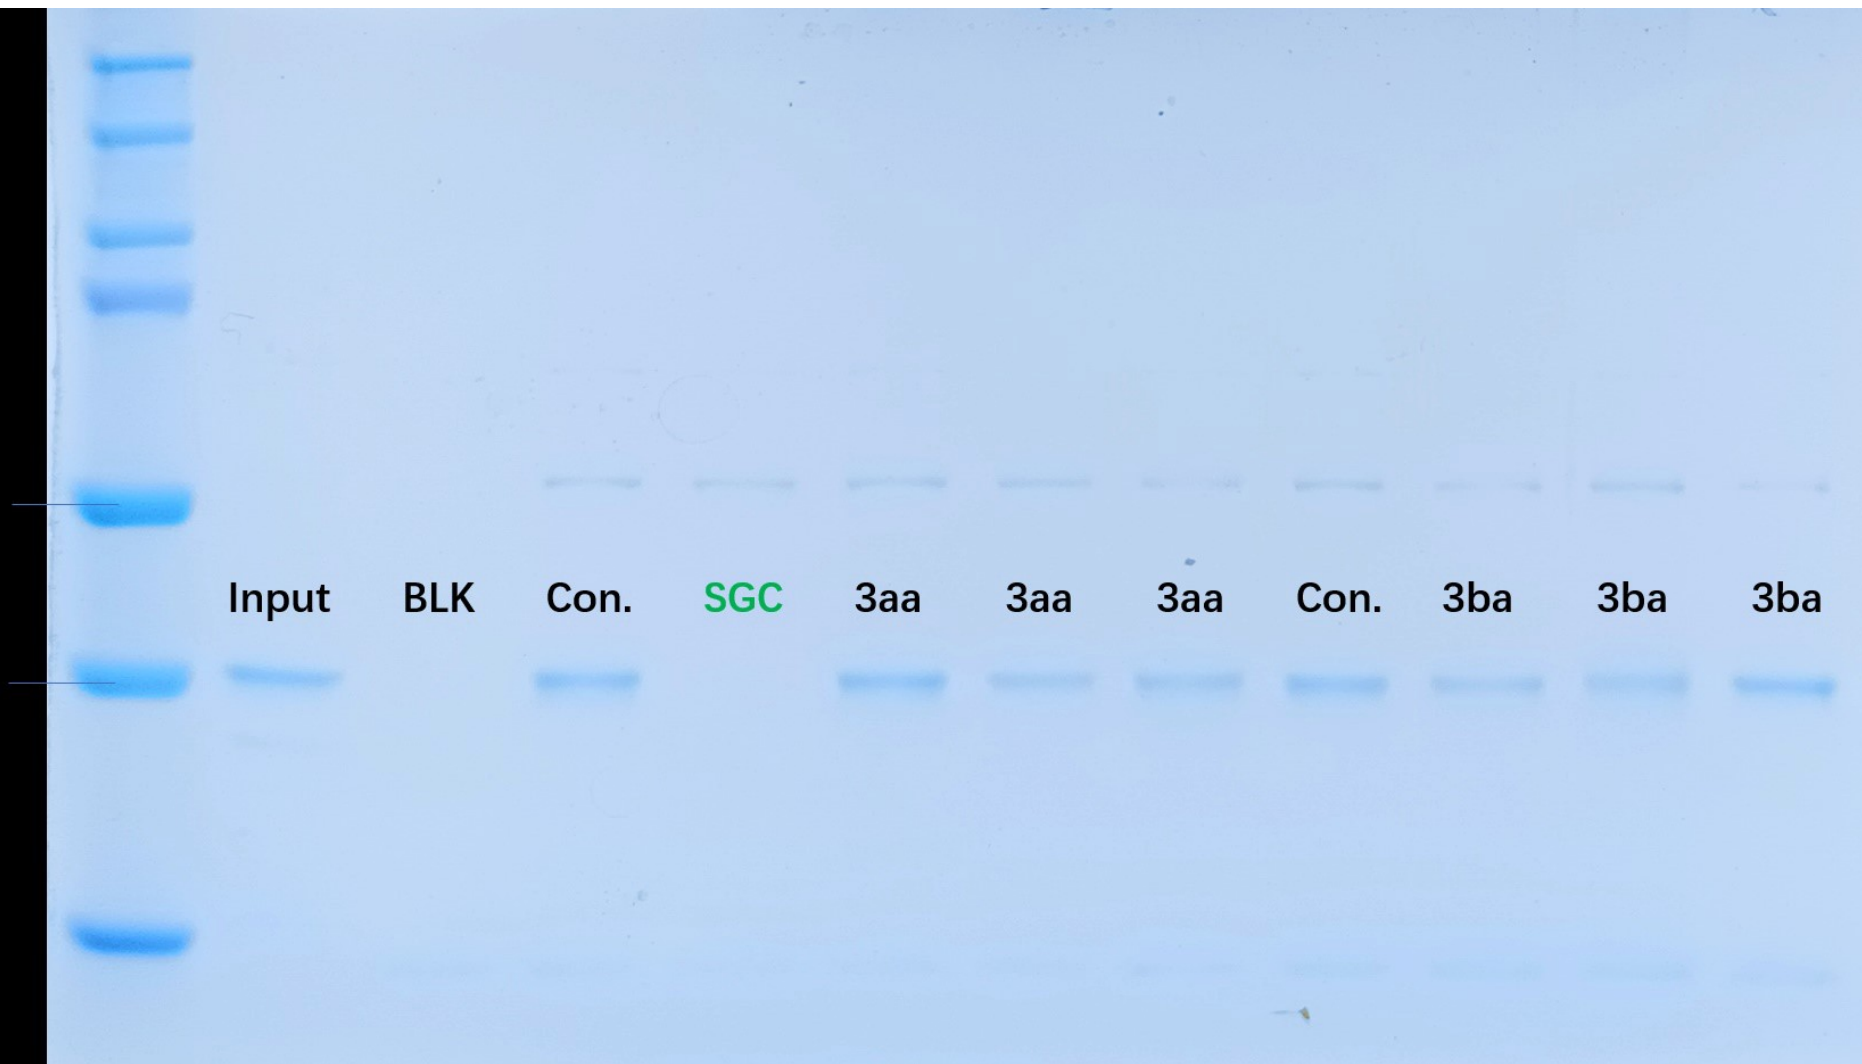

Supplement: d3qo00255a4.pdf [file d3qo00255a4.pdf]
